# Supplementary material for: Re-analysis of SARS-CoV-2-infected host cell proteomics time-course data by impact pathway analysis and network analysis: a potential link with inflammatory response
Source: Aging (Albany NY). 2020 Jun 23;12(12):11277–86. doi: 10.18632/aging.103524 (PMC7343490; doi:10.18632/aging.103524)
Supplement: Supplementary Table 1 [file aging-12-103524-s003..csv]

Protein	2h vs. mock_fc	2h vs. mock_p	6h vs. mock_fc	6h vs. mock_p	10h vs. mock_fc	10h vs. mock_p	24h vs. mock_fc	24h vs. mock_p
Q06481	-0.088310303	0.019746379	-0.082781344	0.101436179	-0.162824854	0.023381718	-0.809009154	1.86973E-07
P49715	0.004212187	0.933382179	-0.05966225	0.256808552	0.030227942	0.827560494	-0.98720451	1.46462E-05
P06748	-0.056877048	0.127659478	0.047451524	0.100601126	0.04657464	0.097754223	0.388994973	1.7134E-05
P02533	-0.110229346	0.043877314	0.377079939	0.036906314	-0.080707632	0.024399033	0.576494494	2.0951E-05
P02771	-0.124914516	0.483777331	-0.172416909	0.090443078	0.028795472	0.875524588	-1.023012683	2.81724E-05
O00767	0.072715046	0.510985336	0.04794641	0.473490189	-0.096809844	0.06421419	-1.183716106	3.06709E-05
P10619	-0.079516723	0.285066908	-0.045086941	0.311072834	0.021634	0.647777048	-0.385479199	3.09299E-05
Q9BRK5	-0.11422588	0.182968793	-0.001709133	0.957895129	-0.029170083	0.373875678	-0.2020668	3.74866E-05
P55061	-0.10631211	0.145563137	-0.129795176	6.20685E-05	-0.168080822	0.002093348	-1.082585295	3.76043E-05
Q7Z3J2	-0.117606384	0.229779321	-0.1109928	0.002016826	-0.045245465	0.644675585	0.885322867	3.83039E-05
Q86SE5	0.194704407	0.058645664	0.170311493	0.188061712	0.119109832	0.349370223	0.778987261	4.37057E-05
P02647	-0.055752997	0.411118441	0.031789574	0.631968639	-0.231838293	0.043070918	-0.944616935	4.91889E-05
P0DTC6	-0.077996812	0.651612567	0.390071522	0.103918759	0.761931001	0.008175006	3.496425135	4.98303E-05
Q16850	0.005349253	0.90442411	0.074314903	0.057465973	0.037939873	0.477743262	-0.449102671	5.10857E-05
Q9H0U9	-0.190469139	0.117636536	-0.071908962	0.445679289	-0.385439323	0.003860808	-2.121068791	5.28217E-05
Q2TB90	-0.261783682	0.651038616	-0.017280043	0.969758618	0.120057783	0.709704221	1.098900547	5.40681E-05
P02766	-0.148993417	0.2510099	-0.15397686	0.174374773	-0.123649759	0.492149978	-1.073283096	5.54438E-05
P24534	-0.062774042	0.000142659	-0.01805736	0.22112387	0.044089501	0.169233446	0.142351654	6.71467E-05
P20248	-0.04809134	0.276314011	-0.019457413	0.60424094	0.149881814	0.193607171	-0.453054121	7.16312E-05
Q15465	0.035947636	0.776661748	0.021017413	0.812532826	-0.090170929	0.290568433	-2.857718617	7.57215E-05
Q3SZ57	-0.204156431	0.295864728	-0.12879921	0.253136481	0.024565292	0.904426459	-1.205276628	8.22644E-05
Q01581	-0.072215508	0.036124459	0.014335118	0.584563358	-0.016544564	0.616448085	-0.444957998	8.80182E-05
Q15043	-0.117752429	0.164357331	-0.101686317	0.058788366	-0.096378171	0.352255016	-0.370259525	9.51397E-05
Q9UBM7	0.068605324	0.072115816	0.037317183	0.18575544	0.084731715	0.19249668	0.116594626	9.86125E-05
P23921	-0.065695045	0.100982021	0.131275491	0.000745707	0.041256291	0.458928808	-0.223032822	0.000100785
P02652	0.559813536	0.14478395	-0.085330896	0.519506105	0.125748338	0.619125292	-2.61336155	0.000108987
O14950	-0.026367613	0.54592417	0.031632198	0.471738311	-0.043804805	0.458695365	0.238853284	0.000117027
P11940	0.018099279	0.380907527	0.034017627	0.117359669	0.035129785	0.28090767	0.153020261	0.00011892
Q9NPE3	-0.09875616	0.065221237	-0.054490974	0.480151243	0.044044848	0.581125411	0.600832408	0.000124463
Q3ZBD7	0.019879702	0.814517694	0.036837583	0.457232795	0.09475487	0.450655993	0.285714073	0.00012528
Q9UBU8	-0.013114596	0.785613126	-0.082264194	0.494483543	-0.091895386	0.239443955	-0.418618067	0.000134067
Q8NC51	-0.016557393	0.453124633	0.052945347	0.133294923	0.052339994	0.046617474	0.139281526	0.000135716
P67936	-0.033651388	0.617474752	0.067982334	0.085891203	0.073070091	0.353492081	0.385973564	0.000137831
P61009	0.035232761	0.119402298	0.151197017	0.006854463	0.050937122	0.200182519	0.1862514	0.000140395
Q9NPH2	0.153713988	0.107734315	0.09622988	0.724254202	0.053687207	0.753832689	-0.561109303	0.000149967
P57773	0.010204643	0.916728974	0.04505556	0.095266968	0.124609727	0.100834813	0.240702943	0.000153816
O00762	-0.122842081	0.213277247	-0.053172947	0.461080042	0.061623594	0.382998221	-0.909280016	0.000154743
O00483	-0.151357603	0.242756768	0.038016847	0.296413397	-0.091495485	0.206943264	-0.519344911	0.00015608
O94788	-0.274497608	0.030945706	-0.102638722	0.328686623	-0.08948833	0.253290717	0.815561334	0.000157463
Q92841	-0.005935871	0.889451061	0.047080532	0.081007262	0.044653538	0.034248879	0.112858384	0.000157989
P51991	-0.039707008	0.184615077	-0.057086211	0.155035585	0.023712821	0.157585676	0.283788071	0.000158472
P06756	0.023885716	0.33060957	0.063535848	0.027503965	0.044601661	0.389712854	0.23126687	0.00016026
Q00610	-0.010320655	0.357834945	-0.005646945	0.812280947	0.062237502	0.002398721	0.115975321	0.000160598
P15531	-0.005564364	0.657286325	0.06147714	0.04141597	0.063491682	0.093854208	-0.091489898	0.000166638
Q08211	-0.038296084	0.086589372	0.00904301	0.718889432	0.039438996	0.189402465	0.133380274	0.000167317
O95182	0.015904653	0.738444849	0.149116915	0.127206586	0.060186409	0.28878245	0.350442025	0.00018043
Q9BXS1	0.032122021	0.781672436	-0.031857941	0.79893286	-0.002042536	0.986881335	-1.098309058	0.000183763
Q9Y5Y6	-0.036420588	0.532400603	-0.074118203	0.04231149	-0.007509868	0.705607272	-0.457630318	0.000204699
Q71U36	-0.106275789	0.011482306	0.024426682	0.722670246	0.036331107	0.379332269	0.303873951	0.000205259
Q8NHP8	-0.296202314	0.001174542	0.092122704	0.170736948	-0.040057927	0.356243681	-0.134863356	0.000212048
P35580	0.001264015	0.978416098	0.051972796	0.077663016	0.028794354	0.240797319	0.171093864	0.000215328
Q15370	-0.0227175	0.418592783	0.164182682	0.020686046	0.042215734	0.174522999	-0.108258268	0.000233551
P14927	-0.051097958	0.129814183	-0.028218494	0.231913199	0.019757231	0.096098352	0.156506511	0.000242546
Q16777	-0.459048195	0.03632614	-0.501544816	0.062202958	-0.203292008	0.304376893	1.356739529	0.000251647
P43897	-0.047356162	0.107418742	-0.050433676	0.505349352	0.048597837	0.19821445	0.253773673	0.000253737
O60566	0.103898414	0.334584663	0.230509276	0.049607053	0.117504264	0.040832384	-0.453377212	0.000262972
P62857	-0.097729662	0.005004837	0.025845048	0.44091104	-0.091543787	0.053152037	0.165630432	0.000266666
P14625	-0.0176898	0.391097673	0.023233035	0.43315276	0.022807529	0.333981751	0.129589025	0.000269795
P27824	0.001065778	0.962239076	0.017854207	0.189025606	0.08129339	0.002956594	0.137480131	0.000276198
O43291	0.010136555	0.910312305	-0.057114601	0.273989102	-0.013459302	0.728407302	-0.649597332	0.000282595
P01034	-0.078265164	0.066921254	-0.118734704	0.042726063	-0.040039748	0.71924669	-0.45631322	0.000296782
Q6NTF9	0.024466128	0.840686911	0.086421915	0.484978015	-0.065967843	0.521739955	-0.916961438	0.000303969
P55209	-0.166862603	0.07808979	-0.043335358	0.354750863	-0.062025345	0.323875312	0.442788489	0.000308583
Q96A33	-0.00505468	0.853270263	-0.017196722	0.605857421	0.066521531	0.192468537	0.178786089	0.000315704
P62736	0.073437681	0.028600504	0.025112552	0.274967243	0.061643222	0.265497373	0.135642241	0.000320158
Q06481	-0.103698833	0.207375458	-0.110084635	0.120600578	-0.35146154	0.001824049	-1.790573089	0.000325416
P29401	-0.028936339	0.328289852	0.188084017	0.00029301	0.066945704	0.031371487	0.284585248	0.000330696
Q07955	-0.054716128	0.007826842	0.025729505	0.373597452	-0.011361611	0.691715112	0.203838057	0.000331653
P63302	-0.141981632	0.406484362	-0.148978564	0.463212794	-0.258148674	0.187321589	-1.781501128	0.000332501
P04004	0.178350071	0.07487031	0.311417007	0.032045134	-0.197216981	0.080563066	0.851011883	0.000335769
Q00610	-0.02513535	0.217476994	0.016696493	0.472844162	0.033410401	0.103622909	0.100153791	0.000339107
P31431	-0.034466707	0.563224099	-0.090273469	0.068387639	0.125242822	0.128753771	-0.689494069	0.000344361
P05023	-0.001001982	0.937028929	0.028932297	0.222739122	0.001084017	0.952094988	0.221103813	0.000347133
O95395	0.124607129	0.043492266	0.148154051	0.045399676	0.106358384	0.034922333	0.541649321	0.000352994
Q9H3Q1	0.03539834	0.205173008	0.009574114	0.842427449	-0.004841975	0.93331202	-0.263702706	0.000353525
P84243	-0.069315622	0.204445362	-0.112669234	0.062506646	-0.079561985	0.42267802	-0.74440896	0.000368146
O75190	0.066956979	0.068026811	0.203609532	0.056399814	-0.024901849	0.738567276	-0.513755653	0.00037871
P0DTC2	0.036042716	0.751902273	0.680448614	0.002355772	2.51806663	0.004365948	4.71730011	0.000383098
Q9NZ08	0.027629721	0.287078672	-0.003557067	0.857117657	0.070457188	0.022457654	0.154232483	0.000392177
Q14697	-0.010456725	0.741560892	0.038542984	0.028087288	0.018165532	0.372366976	0.146728989	0.000396345
O43390	-0.050885958	0.134362341	0.013668963	0.463672142	0.033642605	0.232126461	0.105936754	0.000406986
Q9Y237	-0.046789685	0.01668367	0.031754532	0.528017095	0.003294741	0.932233572	-0.176479404	0.000410437
P31947	-0.020443582	0.394764382	-0.022050497	0.328772435	0.047633698	0.354715025	0.213617522	0.000412582
P21281	0.018565402	0.286500137	-0.020747349	0.417204713	0.028673414	0.517466051	-0.128151305	0.000414549
Q9NSE4	-0.008083401	0.337706485	0.022084543	0.191990199	0.03069498	0.052064729	0.146211854	0.000417384
Q9NVE7	0.029869835	0.218804001	-0.016496895	0.492014989	-0.001217208	0.963299845	-0.092408682	0.000419062
O60869	-0.078955156	0.088231973	-0.011133303	0.472088801	0.07366587	0.103388314	-0.217733116	0.000435441
P09429	-0.090809266	0.001993487	0.020400353	0.806569831	0.114671132	0.141353354	0.17095943	0.000435631
Q03426	-0.011215606	0.693833897	-0.025021483	0.27609715	0.050980403	0.30608029	-0.168805587	0.000456287
P78371	-0.02561267	0.180876961	-0.001043752	0.927441855	0.056584588	0.01666503	0.132305586	0.000457334
O75874	-0.068520711	0.245191525	-0.09434509	0.059810112	0.070263765	0.344749249	-0.24723023	0.00046733
Q14677	-0.005337452	0.805473637	-0.00948089	0.501174554	0.04417698	0.017156807	-0.14070864	0.000470171
P0DTC1	0.039087786	0.725948721	0.147017007	0.164750769	1.033962767	0.000151733	3.674874778	0.000474783
P04233	-0.098554218	0.19320822	-0.124647556	0.006079046	0.067718872	0.072415431	-0.47025411	0.000496321
Q9Y2Z9	0.407799737	0.198059691	-0.140768961	0.418457844	-0.158418087	0.571616578	-0.775103117	0.000504549
O95149	-0.018661794	0.804355038	-0.088347956	0.133729605	-0.035397501	0.5233023	-0.389610724	0.000518687
P05204	0.010071834	0.933805594	0.274612675	0.259368883	0.313547808	0.194660877	0.636646242	0.000525859
Q92896	-0.049737672	0.181182026	0.000107459	0.997787236	0.022056305	0.750977742	-0.259249183	0.000527196
O95470	0.006484351	0.537258097	-0.074588662	0.016103637	0.096346629	0.080893868	0.182124925	0.000531648
P28482	-0.001111793	0.968938844	-0.038248192	0.481251011	0.03350328	0.205770889	-0.146796378	0.000532677
P30038	0.11494322	0.075009406	0.048816901	0.110011766	0.024744005	0.703768822	-0.130098793	0.000537082
Q8TCS8	-0.031036691	0.048964954	-0.029012033	0.188531624	0.053901037	0.044238616	0.123552799	0.000538661
P21796	-0.017113343	0.658483828	0.023463208	0.633802327	0.035183901	0.176048443	0.232038752	0.000547779
P08727	0.039329188	0.021665427	0.013978969	0.714666626	0.050850761	0.44910664	0.135025629	0.000548365
P02649	-0.043821582	0.272391765	-0.068134484	0.029729181	-0.140331793	0.012206409	-0.880814181	0.000559876
P12830	-0.01013432	0.518858728	-0.014233451	0.480867668	0.004104767	0.900848128	-0.144770678	0.000561223
Q9Y6N5	0.009550225	0.715874725	-0.034814499	0.135128756	0.042219598	0.350921443	0.216630376	0.000562521
P17535	0.083056569	0.132422861	0.282824992	0.027225993	0.126436659	0.416911348	0.461261452	0.000566052
Q92539	0.010011864	0.838244626	0.006238887	0.894152169	0.115987867	0.151435002	0.160827639	0.000568593
Q9Y4P3	0.033298205	0.152221289	-0.031767203	0.283943836	0.067332892	0.021609443	0.130428637	0.000573877
H-INV:HIT000292931	-0.03125013	0.119408627	-0.032947485	0.365545856	0.006397083	0.87145743	0.357451138	0.000581924
P05783	-0.043583091	0.078121343	-0.072870243	0.019343719	0.028604532	0.337138569	0.325740834	0.000584781
P46934	0.115164248	0.094197169	-0.029585078	0.192202138	0.002571217	0.968192765	-0.512451979	0.000587406
P00352	-0.018377443	0.729803635	-0.121042664	0.022729796	0.035470347	0.753412288	-0.276058405	0.00060813
Q8WUW1	0.016965549	0.814995813	-0.043619568	0.201079043	-0.044081502	0.350548029	-0.141924622	0.000614189
Q9Y5J9	-0.111633858	0.139586428	0.057703743	0.710924217	-0.169070611	0.240993197	-0.747750484	0.000618816
Q8NCA5	0.030796754	0.294861721	0.067619649	0.157576663	0.136603922	0.011237162	0.116099249	0.00062096
Q96FW1	0.021809291	0.512751527	-0.012222929	0.597175796	0.070446018	0.129589508	-0.125184951	0.000623228
Q15126	0.001979542	0.970108873	0.026195506	0.508167573	0.045060292	0.07861611	-0.200148444	0.000627657
P48735	0.023859175	0.308532114	-0.052273134	0.127568222	0.020175512	0.523875483	0.23913847	0.00062778
Q7L576	0.010210257	0.610153928	-0.009024877	0.532600513	0.074583639	0.037948904	0.078213143	0.000634975
P27216	-0.03818092	0.381497253	0.026433938	0.405612166	0.074698883	0.211618206	0.41497932	0.000649151
P07910	-0.01441989	0.670891555	0.06617184	0.117122413	0.064638322	0.103478678	0.25898587	0.000650447
O14976	0.003697071	0.851142962	-0.019486574	0.512859117	0.024468139	0.173523724	-0.148140343	0.00065069
Q99519	-0.000142901	0.998002863	-0.039379964	0.568048123	0.002131649	0.973633161	-0.526634805	0.000657177
Q96IX5	-0.007586783	0.846469898	0.008521625	0.897196543	0.038471853	0.402531279	0.272416771	0.000659019
Q16777	0.141027772	0.084127334	0.10004099	0.289247627	0.209187177	0.003812437	-0.567924509	0.000659183
Q9NZI8	-0.074290806	0.171605276	-0.07856195	0.196970215	-0.010010993	0.860512876	-0.153093488	0.000661243
O00264	0.041888721	0.000515782	-0.031608738	0.20939338	0.034247533	0.42475014	0.134584602	0.000662981
P42167	0.073660013	0.054275279	-0.028810861	0.07889875	0.095507252	0.006953025	0.218054616	0.000684843
Q9UL33	-0.061564034	0.075629293	0.060615566	0.178066314	0.001518875	0.855242138	-0.255507368	0.000693985
P20340	-0.003981997	0.91595707	-0.047832262	0.101638665	0.062985734	0.169074095	0.252602382	0.000694234
P07237	-0.034892776	0.330373663	0.026568704	0.493768159	0.067099326	0.029258846	0.252648008	0.000695624
Q5MNZ9	0.001973413	0.947562452	0.028524416	0.516447459	0.075840325	0.408796516	0.221050178	0.000701871
P58546	-0.023414978	0.715098213	0.004760307	0.886823942	-0.035884682	0.422792317	-0.431435353	0.000712807
Q9Y666	0.047942254	0.249968981	0.119479524	0.007778356	0.064217495	0.383978545	0.204250048	0.000748818
P80303	-0.018287697	0.482429346	0.014469519	0.72512334	-0.045554079	0.352253204	-0.186875338	0.000751969
P31942	0.008815422	0.678890771	-0.007576995	0.214398353	0.058349481	0.027883134	0.094392189	0.000758665
P16949	-0.085843653	0.026879114	0.150933062	0.140682273	-0.002975246	0.958731497	-0.224442271	0.000767553
Q9BXS6	0.036454368	0.636910399	0.228644492	0.103601863	0.035723706	0.516555145	-0.882903881	0.00076925
P61978	-0.009733391	0.059800854	0.013376254	0.627995732	0.045953562	0.024270362	0.122178764	0.000773257
O43837	0.000572628	0.971762911	-0.01477547	0.654038853	0.054193379	0.108706666	0.158111869	0.00077689
Q9H190	0.029231377	0.529240301	-0.046311647	0.221109057	0.064041875	0.334224718	0.294539155	0.000784383
P15428	-0.021809549	0.643933461	-0.112229764	0.074432996	0.067571423	0.452892299	-0.691614855	0.000801747
Q6WKZ4	-0.046589182	0.438701153	-0.035351028	0.589470339	-0.047460015	0.523858712	-0.34793811	0.000812361
Q92743	0.111090848	0.176655704	0.212709942	0.113303221	-0.062354296	0.633932318	0.665187808	0.000813274
P51812	-0.041651054	0.281501774	-0.070308895	0.021829269	0.052032713	0.413138965	-0.242359525	0.000825626
P10809	-0.01901657	0.413081184	-0.000730319	0.971497921	0.043260507	0.064660873	0.183400667	0.000828337
O15162	0.021771833	0.729582925	0.010874515	0.79777353	-0.017221926	0.702622425	0.536828327	0.000829856
P07108	-0.032312794	0.767992796	-0.245209482	0.009950823	-0.252593906	0.14187578	-1.033012722	0.000837122
P25815	0.080121146	0.133733645	-0.219495364	0.26458923	0.006317483	0.905188302	-0.649143418	0.00083828
Q15654	0.036475742	0.113742225	0.05358177	0.266466248	-0.033168383	0.479041831	0.219401441	0.000842835
P63098	-0.097957313	0.127385203	-0.005053979	0.823797311	0.034487366	0.311384648	-0.350954761	0.000852783
P11021	-0.001731028	0.865744084	0.047748875	0.005134773	0.038903992	0.030133498	0.169593857	0.000855296
P98164	-0.010097779	0.879847228	-0.156083501	0.397314745	-0.095487122	0.214049512	-0.567891983	0.000856499
P05787	-0.019439531	0.535851405	-0.047753874	0.073716638	0.042636248	0.175260535	0.314868486	0.000860128
Q9P0V9	0.11646553	0.170126108	0.110930703	0.259821188	0.098939136	0.232833746	-0.381766087	0.000867867
Q9Y2C4	0.079587039	0.448293637	-0.144227844	0.1443958	0.092294646	0.542582484	-0.226170519	0.00087618
Q9Y4L1	-0.031025044	0.190672062	-0.01514735	0.467872887	0.017367078	0.628409172	0.079542877	0.000887499
P09210	-0.100766019	0.406897286	-0.134721514	0.100677348	0.049849415	0.690802055	-0.265390797	0.00089376
O75844	-0.006615139	0.628558116	0.027483634	0.291197026	0.081134326	0.228784444	0.152468653	0.000907639
P14555	-0.039134372	0.767839647	0.042753188	0.300731135	-0.056463327	0.808956762	0.581366437	0.000908171
P22626	-0.068051845	0.006464842	0.007565099	0.800174833	0.045530595	0.270844815	0.190845786	0.000909465
P78330	0.027887085	0.209667977	-0.039245121	0.428127037	0.061789614	0.140797695	-0.246503086	0.000914371
Q9BQE3	0.009896638	0.717290329	0.038261527	0.564777715	0.032170559	0.178737085	0.306517871	0.000932008
P16989	-0.058082107	0.076328945	0.042562968	0.125736408	-0.050130976	0.263870688	-0.138303499	0.000946047
P02786	-0.090908335	0.014893886	0.024336713	0.624099877	-0.009750226	0.446515669	-0.210821691	0.000946457
P48449	0.056010579	0.352189853	0.00049568	0.983231472	0.053416761	0.359924802	0.147133779	0.000971953
P04264	-0.032765541	0.447021154	-0.112656942	0.123327929	0.15196922	0.059563833	0.62359213	0.000979841
Q15014	-0.00223217	0.970859117	-0.002848559	0.956342732	-0.144104291	0.020494884	-0.595807225	0.001004821
P08729	0.009842726	0.728272006	-0.037315713	0.4490398	0.07720037	0.104863504	0.277340421	0.001029391
P61916	0.01966435	0.678829673	-0.082396444	0.121940986	0.010255251	0.859353998	-0.363621487	0.001034975
Q13308	-0.029883948	0.505895008	0.017162015	0.7976067	0.042058507	0.294149646	-0.400789184	0.001038808
P63104	-0.03284678	0.313321296	0.018299167	0.535547152	0.03432742	0.508442854	0.326066634	0.001042305
P26583	-0.075264696	0.038355992	0.018085211	0.739542221	0.06435631	0.233073566	0.189435364	0.001053973
P23229	0.001029647	0.98847192	0.060704439	0.427010532	0.050672021	0.342749069	0.261983775	0.001058526
Q969Q0	-0.060948393	0.041124207	0.002437807	0.879209345	0.05584852	0.102010955	-0.22182898	0.001089868
Q16787	0.259328323	0.041147753	0.186195889	0.054470885	-0.077687496	0.448921745	0.864799855	0.001092342
P38606	-0.024970926	0.327066164	-0.015577033	0.632992704	0.005753063	0.905017165	-0.088555419	0.001096397
P31946	-0.147710933	0.101550941	-0.075753893	0.248648818	-0.025029903	0.715935816	0.42089915	0.001096494
Q03001	0.036027165	0.136244678	0.023044264	0.407643299	0.040439762	0.208154238	0.167140439	0.001100153
P18583	-0.035209897	0.130140121	0.035196839	0.368387794	0.015857486	0.501813603	-0.102068863	0.001102213
O60716	-0.017157565	0.246855691	-0.028385554	0.066898372	0.037004287	0.217689479	0.096574942	0.00111971
A6NHL2	-0.060271858	0.014117911	0.129965538	0.041955189	0.121700351	0.013753475	0.167534298	0.00112227
Q6NXT6	0.118164408	0.463734487	-0.030485142	0.757227215	0.066058694	0.535267089	0.372075678	0.00112808
P52435	0.000144159	0.995117661	-0.040461367	0.253614732	0.048453755	0.378513447	-0.145459626	0.001129226
P07355	0.022272272	0.677279075	0.081098578	0.109189574	0.028081934	0.752168768	0.294465945	0.001133866
O15355	-0.071006212	0.097040161	-0.020099235	0.584705291	0.022166058	0.499735796	0.203462108	0.001148476
P28066	0.014681189	0.456655933	0.025080043	0.588370637	0.054269568	0.111633581	0.108529706	0.001149637
P05162	-0.021047164	0.57814963	-0.029893136	0.436292177	0.026209389	0.513630902	-0.281589962	0.001177786
P82675	-0.015441267	0.627342189	0.041288305	0.253897039	0.01257821	0.830467691	-0.28047826	0.001202753
Q02952	0.027805982	0.543839715	0.208751381	0.0144865	-0.085062246	0.065350636	0.215597596	0.001210967
Q8NBJ5	-0.03226144	0.364768074	0.194561802	0.000984158	0.229203883	0.004428235	0.381081801	0.00121606
Q8N999	0.457907427	0.00771129	0.251138054	0.062431309	0.340976244	0.020990455	0.366082761	0.001224015
Q92903	-0.158646508	0.090392948	0.095524752	0.65373706	0.003924104	0.972523367	0.56117907	0.00122492
Q9NR45	0.013332553	0.344726306	-0.050514079	0.035011034	0.053105235	0.021251727	0.104273815	0.001241537
P31350	-0.121607557	0.129277959	0.04762667	0.63023446	-0.008874991	0.889898298	-0.904602635	0.001251724
P08047	-0.06201687	0.636548061	-0.127466143	0.509228015	0.284368887	0.005674525	0.50229851	0.001252005
Q96A57	0.023982033	0.640719582	0.057814107	0.365805745	0.048350839	0.537808564	-0.338383336	0.001256051
P00374	-0.165817619	0.043607691	0.051948077	0.330432281	0.043383022	0.631756914	-0.485216106	0.001283083
P40926	0.005403053	0.651586243	-0.008966722	0.541037467	0.082788816	0.000425487	0.135603958	0.001301722
Q9Y6M9	0.02417331	0.467522378	-0.005959725	0.830928523	-0.05536577	0.439919268	0.206585274	0.001307701
Q9HBM1	-0.02261182	0.729505415	-0.022502784	0.610106592	0.075939646	0.247801699	-0.607629222	0.001308591
P08581	0.027668185	0.587475499	0.058593128	0.139796003	0.049940348	0.18788483	-0.317686499	0.001314303
O43395	-0.051248454	0.028825283	-0.049324513	0.06069155	0.057275394	0.301159796	0.076442105	0.001315547
P53985	-0.000105721	0.998350862	0.018652834	0.67120702	0.072835601	0.04061588	0.215806403	0.001330088
P38646	-0.069403271	0.009233942	-0.003145634	0.800326101	0.036744558	0.122890631	0.211945813	0.001335735
Q5XKP0	-0.027176279	0.453898812	-0.058522203	0.062516377	0.099984345	0.041761733	0.154637484	0.001351356
O95292	0.019454679	0.358985591	-0.000146691	0.991289235	0.0534907	0.137205221	0.130913475	0.001356127
P08243	-0.058553739	0.008774338	-0.02842567	0.332815603	0.145721281	0.076900042	-0.176845588	0.001370207
P26599	0.016286321	0.624834384	-0.005351655	0.884482536	0.074708031	0.109264329	0.212471757	0.001377888
Q9BW71	0.004773369	0.923803756	0.024929312	0.796006018	-0.019846891	0.890988829	-0.179263376	0.00138433
O75976	-0.039212906	0.295469442	-0.020011132	0.152216505	0.025164727	0.586098484	-0.193956115	0.00138607
P06865	-0.018427762	0.299836876	-0.026216611	0.406143818	0.005158307	0.799413763	-0.157461084	0.001390115
Q9UKY7	0.036884333	0.283829819	-0.035856375	0.288926705	0.1061121	0.123169878	0.144303352	0.001415243
Q13153	-0.06084916	0.196230178	-0.112111103	0.068963216	-0.004071185	0.905636095	-0.152409566	0.001435046
Q15059	0.07322485	0.082005381	0.043303001	0.572889568	0.144188598	0.141746607	-0.115434395	0.00143723
P46060	-0.021031153	0.297082627	0.024906882	0.384369585	0.03890249	0.072918632	0.139204927	0.00144738
P04181	0.020185957	0.727907302	-0.004418339	0.925412182	0.000368712	0.994272355	-0.570604231	0.001453437
Q9Y6H3	0.20771447	0.032101919	0.541488864	0.006020677	0.413184281	0.090464693	-0.532150018	0.001461221
O60333	0.171800006	0.001614432	0.059750312	0.488388175	0.041283823	0.514379114	-0.152587422	0.001464899
P34932	-0.030168997	0.246519962	-0.019124029	0.134059062	0.049396997	0.232964845	0.098012612	0.001465107
Q9UP95	0.030228354	0.624018896	0.04801623	0.447535818	0.032313625	0.134566291	0.186171681	0.001466037
P31943	-0.010453858	0.149771577	0.039817619	0.024625572	0.049380666	0.011804374	0.103467142	0.001478917
Q9NRX4	0.0730209	0.001410994	-0.034507737	0.233998211	0.061458757	0.217980007	-0.128290814	0.001479568
Q9NZI8	-0.011891944	0.37983951	-0.066037814	0.000600749	0.087008318	0.005065743	0.128262517	0.001481827
Q3ZCQ8	-0.057234175	0.054485219	0.001182374	0.957663953	0.023545711	0.314375483	0.212644039	0.001498398
P35716	0.608733387	0.016401426	-0.660698173	0.009791306	0.764004852	0.001981049	0.261446354	0.001514768
O43520	0.120134093	0.215920445	-0.017112727	0.619085402	0.045946524	0.137196327	0.119436075	0.001522563
O43278	0.025924322	0.251321903	-0.072348416	0.089914442	0.087629595	0.170305135	-0.36882091	0.001531883
P12956	-0.03577158	0.095493484	0.029802048	0.137443248	0.070431881	0.07078917	0.117166817	0.001540012
Q685J3	0.160847084	0.351334883	-0.003075918	0.975725126	0.05257396	0.745561004	0.374736894	0.001557254
Q9BZL1	-0.051453357	0.123981375	0.015665575	0.670683961	-0.136339103	0.136352556	-0.673766084	0.001560873
Q9BPX6	-0.036562959	0.462826519	0.041108729	0.47109442	0.053228124	0.404932535	-0.329744001	0.001563448
P08069	0.052924163	0.778956455	0.121182726	0.200969174	0.084758873	0.322583134	0.422510505	0.001565485
P52209	-0.067942533	0.03095972	0.106550347	0.003721185	0.058894929	0.005497094	0.071359905	0.001569428
P40879	-0.037502776	0.742755747	-0.093885306	0.334082094	-0.013798344	0.933530649	-0.389354019	0.001586147
Q16698	-0.024339446	0.226780655	-0.005957549	0.434543302	0.026403382	0.381117656	0.19131999	0.001588986
P56211	0.044553818	0.436203619	0.017194067	0.864873633	0.032207845	0.58151396	-0.373684866	0.001597408
O96011	0.082799904	0.300373266	-0.02544159	0.337401333	-0.025490404	0.699523253	-0.40998929	0.001602465
P28370	-0.035556364	0.377434636	0.034387564	0.351737126	0.033975544	0.641004913	-0.21706216	0.001610873
P51784	0.105697771	0.214818603	0.017846743	0.87172338	0.164118495	0.137846914	-0.291606191	0.001616503
Q04837	-0.038351807	0.437326798	0.021592678	0.702920332	0.006343013	0.921492764	0.25685483	0.001686304
Q96A35	-0.029777337	0.350449601	0.099501388	0.037675875	-0.012282999	0.857519048	-0.180513937	0.001690056
O60784	0.05989292	0.290139135	0.080048402	0.157526021	0.013565146	0.635939724	-0.416190181	0.001690979
P07306	-0.076871948	0.313644211	-0.089301647	0.375282786	0.025367313	0.885877489	-0.815618581	0.001691541
P23284	-0.082300587	0.106620317	-0.03908782	0.387149048	0.072796592	0.10004236	0.33069008	0.001728996
Q9N2J8	-0.115764052	0.023780466	-0.140397015	0.083699133	-0.373391183	0.055953898	-0.736288845	0.001741828
P06733	0.01181474	0.863476045	0.137354122	0.025743447	0.026832527	0.759471993	0.173053579	0.001748787
P06307	-0.093024129	0.686214353	0.718556039	0.000431845	-0.59896221	0.001748134	-1.318546051	0.001763738
Q96N64	0.01418074	0.747793107	0.000620682	0.992135019	0.146682805	0.147171814	0.34927938	0.001782882
Q9NX40	-0.05468487	0.133080951	-0.01427232	0.385043522	0.034482795	0.358282946	-0.249619069	0.001802784
Q9UMR2	-0.062822071	0.187448197	0.052009519	0.01239211	0.019333851	0.614827596	-0.199971615	0.001819429
P62136	0.071310865	0.051201802	0.199932568	0.019790359	-0.086815901	0.02259583	-0.395596416	0.001820489
Q9HA65	0.010361574	0.862787098	0.096408184	0.058238206	-0.001590305	0.94527936	-0.166282773	0.001837796
P61586	-0.136865481	0.03519159	-0.012922758	0.854233237	-0.052487782	0.377020793	0.511722203	0.001850648
O00244	-0.022077742	0.543868916	-0.024291831	0.638835753	-0.026643476	0.39516703	-0.161779047	0.001850863
Q92604	0.080299914	0.058346215	0.021943316	0.522836082	0.090212237	0.251389219	0.195550016	0.001888899
Q8N163	-0.006053659	0.791965272	-0.020058757	0.252243637	0.049080469	0.014798605	0.075663991	0.001901274
Q9C005	-0.033364142	0.462449194	-0.074266403	0.586245249	-0.040458417	0.517338265	-0.351141511	0.001901291
P07602	-0.019567573	0.708582655	0.092694137	0.478861819	-0.103200082	0.08254357	-0.753555374	0.001907078
P52789	0.111010738	0.373668544	0.114188029	0.482540998	0.12009183	0.321706903	0.48796627	0.001907492
Q00059	-0.050674935	0.023830844	-0.017085063	0.609143574	0.067302943	0.133885384	0.193154374	0.001922567
Q9ULH7	-0.002870113	0.95827395	-0.049077317	0.102609939	0.042194579	0.289617888	-0.273247998	0.001928394
O43819	0.044450085	0.53773293	0.054969173	0.554498694	0.005937788	0.947912546	-0.411921533	0.001930074
Q96FZ2	-0.11058945	0.048380482	-0.042378163	0.489825784	0.001105407	0.977970677	-0.249619856	0.001938268
Q9BRJ6	-0.087367634	0.293563429	0.097733526	0.36095069	-0.034235045	0.557432368	0.278103384	0.001943311
P29966	0.101014383	0.102740238	0.05272537	0.312238733	0.029397614	0.801218386	0.161402764	0.001953334
P04183	-0.056411947	0.359763142	-0.025367631	0.540332778	0.052486129	0.20534064	-0.654860679	0.001966456
Q9BY42	-0.035034453	0.695919633	0.007989121	0.893127621	0.012908971	0.748499894	-0.469783608	0.002018908
Q9NX18	-0.042457444	0.462518837	0.005322208	0.951836527	-0.107556888	0.654615829	-0.60426673	0.002021767
Q15717	-0.030925319	0.079586662	-0.017152352	0.487691434	0.087513786	0.028214621	0.156512856	0.00203357
P05141	-0.056225859	0.041076072	-0.05263702	0.455540604	0.049944381	0.360377168	0.283025325	0.002034328
Q9UBB9	-0.010273803	0.463570037	-0.030622015	0.544145006	0.047120776	0.057787442	0.09234789	0.002043966
O00515	-0.007123504	0.899356118	0.025383413	0.590004566	0.027982891	0.304186772	0.251631283	0.002054023
Q9NPL8	0.068352329	0.532533	0.122287382	0.269002621	0.153995434	0.087606065	-0.246558906	0.002058919
O14965	0.032322215	0.758090781	-0.005251952	0.9524727	0.044490883	0.629997744	-0.655219647	0.00207346
Q8IYU8	-0.039805443	0.106101773	0.01564584	0.660457205	0.034532365	0.466779717	-0.191671879	0.002088287
Q5BJF2	0.033867489	0.243686649	0.03726481	0.506888833	0.10960492	0.130517895	0.052548412	0.002096228
Q01415	0.065078731	0.15742941	-0.022460779	0.5785105	0.04401583	0.12791902	-0.112844446	0.002114405
P46059	0.10456947	0.380150728	0.094136674	0.103196388	0.03109849	0.7312087	0.467747107	0.002116044
Q8WUH2	0.24422176	0.008589261	0.27697822	0.334810183	0.171801036	0.403442476	-0.542398711	0.002123759
P62837	-0.043702792	0.078272551	-0.008919803	0.886624851	0.121588759	0.086179125	-0.118254649	0.002129361
Q8N5F7	-0.22120608	0.177227459	0.343307956	0.192219939	-0.111842276	0.283634007	-0.193009586	0.002134365
Q9BYE9	0.122568519	0.104126812	0.021455231	0.631458209	0.045934783	0.677318464	0.214780894	0.002142187
P38435	0.114767005	0.001475428	-0.003980686	0.871888423	0.117543415	0.23920389	-0.327980043	0.002144312
Q9HC07	-0.100471971	0.014733157	-0.031629416	0.025405135	-0.032630275	0.145208878	0.171979352	0.002148283
P29317	-0.149986254	0.019599339	-0.04077123	0.622493233	0.003656603	0.960787491	0.51641514	0.002161824
P09234	0.001027288	0.967199611	0.013054101	0.721685705	0.057003733	0.364544895	0.195552119	0.002165225
P82932	0.032099596	0.470850254	0.056829427	0.34735102	0.020701732	0.741270134	-0.170614351	0.002189676
P30101	-0.018961617	0.074557758	-0.018935324	0.248761719	0.027319999	0.100043259	0.129982539	0.002207004
P02649	-0.126498365	0.031999911	-0.053630449	0.270575134	-0.232816408	0.053568824	-0.945827848	0.002228329
P60709	0.069339351	0.071568629	0.045214827	0.096445036	0.066948436	0.031276694	0.235376345	0.002232122
Q15628	0.027310299	0.693113591	0.145305164	0.10571476	0.046366489	0.308901586	-0.294055248	0.002237135
Q9HBG4	-0.12135062	0.257204457	-0.003329703	0.986650676	-0.224347632	0.130722399	-2.615995587	0.002240388
A1L0T0	0.100628837	0.058156149	0.015782546	0.580858129	0.062067362	0.226969355	0.105407277	0.002246707
Q9H8M5	-0.020918999	0.814117028	0.011210397	0.906564305	0.038786815	0.361333777	0.323979722	0.002263926
P13667	-0.017686543	0.309172118	-0.013693782	0.287245974	0.05394884	0.061395964	0.116619507	0.002288261
P00533	0.180351445	0.211714034	0.056384524	0.099155948	0.077924498	0.608600744	0.276224649	0.002290652
O95274	0.119192798	0.538734529	-0.242899167	0.468561716	0.231030834	0.198911746	1.204122586	0.002297523
Q99417	-0.02323337	0.760873472	-0.048953196	0.624133282	-0.01060121	0.838492722	-0.232923858	0.002348851
Q8N6H7	0.008421869	0.895479451	0.07303395	0.230622428	0.027177357	0.708008821	-0.222703791	0.002351755
P51654	-0.465382871	0.107504777	-0.140255625	0.250097192	-0.267911537	0.052076576	-0.798276187	0.002358687
O43294	0.180251734	0.007377724	0.62887775	0.001355893	0.015648416	0.873259247	0.519041877	0.002371193
Q13685	-0.035746671	0.094139702	-0.041633224	0.246835094	0.053329752	0.177119605	-0.23127916	0.002371533
P15408	0.148267942	0.360559804	0.200588758	0.242349721	0.107089548	0.306834887	0.288893509	0.002374707
Q9BUF5	-0.068008354	0.234180126	0.188966175	0.028685156	-0.064142923	0.243739183	0.184637906	0.002396369
P61204	0.191973708	0.040023389	0.307961631	0.029679979	0.198346699	0.086355166	-0.888203849	0.0024111
P42765	0.053344065	0.311771551	-0.020472164	0.640732383	0.03858189	0.582732766	0.20818383	0.002415896
Q13885	0.036513458	0.46826435	-0.078781078	0.045569447	0.126981474	0.306649805	0.275494835	0.002432074
Q13045	0.026194978	0.246938053	0.022948077	0.361042708	0.060499859	0.000465112	0.083517617	0.002439234
P09417	0.009041311	0.872524929	-0.009498759	0.464278402	0.030523519	0.253103141	-0.103033325	0.002461786
Q9Y365	-0.006371417	0.885105864	-0.116518585	0.01998099	0.049447442	0.378800136	-0.07376623	0.002476997
P63241	-0.015450458	0.495871689	0.204288621	0.002395693	0.066873742	0.152508601	-0.074661776	0.002482691
P11388	-0.043175981	0.211297442	0.174591597	0.109992459	0.068895012	0.41083377	-0.440600518	0.002499694
P07305	0.108721422	0.234209246	-0.079685902	0.40355402	0.088742546	0.05399122	-0.442707272	0.002502952
P24539	0.013896625	0.620306633	0.00320048	0.767239339	0.064974252	0.183664262	0.162070228	0.002544995
Q9HD43	0.032779608	0.585757312	0.115083149	0.258848182	0.056399461	0.472931017	0.483890204	0.002547742
P01009	-0.005658964	0.859816615	-0.02665431	0.265722218	-0.075308002	0.149886425	-0.483388833	0.002557846
Q9C0E2	0.033150783	0.279929406	0.121717039	0.12284551	-0.029066688	0.598545796	0.45931512	0.002566548
Q9UBR2	-0.017069418	0.719243757	0.090290479	0.035408099	0.02825436	0.278834493	0.245723242	0.002577993
Q14157	-0.069328412	0.09583608	0.00834665	0.767193435	0.031150502	0.605335093	-0.161225975	0.002581001
Q969H8	-0.013404687	0.580814129	0.021746102	0.135142518	0.074004521	0.293817776	0.2078497	0.00259476
O60911	-0.131700188	0.033772182	0.035629744	0.558295347	0.043399592	0.485273442	-0.336510949	0.002600604
P04114	-0.01249074	0.854084189	0.168024672	0.014276086	-0.125403098	0.014359501	-0.183337335	0.002649497
P23378	0.035699344	0.160668483	-0.049147106	0.103084811	0.016799499	0.677114212	-0.055559613	0.002668664
P30043	0.032018468	0.287959436	0.005245117	0.842884906	0.064118511	0.002042797	-0.141609923	0.002680543
P46926	0.014589627	0.64554899	-0.055756128	0.091767899	0.052843949	0.158580997	-0.100125116	0.002706285
Q9ULW0	-0.083274229	0.249416676	0.151786739	0.16610282	-0.193175771	0.057985505	-0.497362087	0.00270933
P20810	0.013271124	0.196167885	0.088562252	0.013882615	0.021638158	0.774604689	0.20025588	0.002715104
Q9BVS4	-0.090423621	0.443160166	0.174527352	0.277488842	-0.100917676	0.38664874	-0.622882849	0.002736177
P46952	0.059357904	0.00258291	-0.041384086	0.57625364	0.044692738	0.240757879	-0.175736965	0.002759968
P62861	-0.042948569	0.720785634	-0.113586633	0.003234857	0.249891246	0.120277601	0.732731024	0.002763297
Q07954	0.066167665	0.203860271	0.070195245	0.006889187	-0.05664706	0.118995425	-0.172329042	0.002778512
O43776	-0.044444012	0.18890759	0.004750257	0.774304668	0.04389252	0.019350948	-0.086368156	0.002785764
Q13509	0.030508591	0.723838774	0.028353357	0.839850201	0.157277927	0.292234093	0.294333748	0.002812181
Q8TEB1	-0.07118921	0.282385243	0.009719285	0.854509157	-0.138279085	0.171864736	-0.168477685	0.002836122
Q9TRI1	-0.023850224	0.504338999	0.797700313	0.00022324	-0.039594704	0.570501074	0.181092252	0.002840048
Q9Y580	0.110254538	0.186931713	0.136778632	0.137317331	0.089481082	0.243014837	-0.374302669	0.00284963
P62995	-0.002683004	0.862241728	0.012226042	0.415042978	0.030510453	0.108010608	0.122136764	0.002864377
P57735	0.044844246	0.258133044	-0.037360557	0.373834665	0.152900575	0.101016297	0.114946554	0.002868298
P49137	-0.007331473	0.941306958	0.058037225	0.33938881	0.058549276	0.359715519	-0.288027773	0.00287133
Q96PU8	-0.037237962	0.621513106	0.233583103	0.000456673	-0.110274895	0.063764938	-0.149172341	0.002877569
P19338	-0.0964147	0.003550475	0.003211479	0.888675935	0.025498508	0.471724819	0.183807245	0.002878129
P60709	-0.021173269	0.682309499	0.055591662	0.162847139	0.069474048	0.459374316	0.359451864	0.002897563
P61225	-0.015638474	0.904124822	-0.133281389	0.314960781	0.007529138	0.898172099	0.303708788	0.002900131
Q6P4E1	0.02873529	0.506231599	-0.031679791	0.33980674	0.019508262	0.792614837	-0.21572494	0.002953655
Q9UHA3	-0.067478854	0.000661379	0.106439678	0.063767203	-0.124933091	0.078849794	0.271461211	0.002956444
P08729	-0.166895548	0.053779324	-0.156280676	0.059767573	-0.025313553	0.665646708	0.663343156	0.002980041
Q8NFV4	0.020096272	0.502240073	-0.038377931	0.26832394	0.0350182	0.566252795	0.168001836	0.003027915
P01019	0.016764628	0.939717719	0.185277554	0.272896371	-0.210462316	0.055320025	-0.725441442	0.003032962
P62879	-0.014081225	0.610344249	0.22271301	0.001142456	0.052280447	0.554744179	0.383308225	0.00308396
O95573	0.033234419	0.44939697	0.053023481	0.034693969	0.067297159	0.020281391	0.114225258	0.003089269
P38159	-0.005850502	0.893497631	0.051202964	0.197855032	0.065958404	0.10165107	0.145152742	0.003109349
O75884	-0.046243578	0.446525263	-0.045332908	0.115929059	0.093619747	0.002003789	-0.189140506	0.003133483
Q9Y3Q8	0.048246343	0.369771039	0.371356916	0.041257077	0.092613231	0.504198383	-0.501869366	0.003154393
P20933	-0.064812089	0.726958305	0.266333241	0.306591788	-0.206845097	0.274920173	0.660371574	0.003177682
Q9H204	0.148287214	0.224161881	-0.168215665	0.28013208	-0.002573157	0.989549515	-0.700398629	0.003195135
Q9D312	0.035874233	0.332516382	-0.077288591	0.310925932	0.050152077	0.338337899	0.288310512	0.003206544
Q99816	-0.040833761	0.067507544	0.059819649	0.018919474	0.041819786	0.343087294	-0.21988666	0.003217317
P08670	-0.079092894	0.029531636	0.343780826	0.001909367	-0.060987152	0.063167855	0.118951775	0.003222152
P07900	-0.031527284	0.038893481	0.007475649	0.534896988	0.047455287	0.029883201	0.074407736	0.003233124
P09327	-0.036066022	0.107548051	-0.027632849	0.107400311	0.017336495	0.653874155	-0.114231296	0.003249202
P11234	0.015170645	0.720025659	-0.055986895	0.230206035	0.061190924	0.055143599	0.133432327	0.003256107
Q15746	0.150764777	0.157429164	0.035542207	0.152157521	0.028738902	0.821615237	0.149492393	0.00329784
Q16651	0.051177365	0.555345602	-0.008619001	0.879553046	0.071066077	0.52919513	-0.143460506	0.003337479
P04179	0.010589226	0.679135356	0.010840018	0.766263738	0.1071008	0.006408736	0.115251223	0.003339626
Q7Z2W9	-0.067038226	0.056991816	-0.014293419	0.837915925	-0.012777819	0.887089059	-0.152876616	0.003345389
Q9NUQ2	-0.000766541	0.989894194	0.008342329	0.935646746	0.098065557	0.350562275	-0.2804414	0.00335352
P61803	0.004975374	0.892945531	0.028640598	0.384933409	0.029467808	0.264177488	-0.109977018	0.003361855
P62701	-0.03488905	0.095120134	0.024005908	0.193847547	0.037974881	0.01704919	0.101826565	0.003377569
P02545	0.007013514	0.835354519	0.121334385	0.011769251	0.015750124	0.118277097	0.150782222	0.003390349
Q8NBJ4	-0.029822552	0.564059306	-0.011767439	0.668370967	-0.002304529	0.968624323	-0.230348991	0.003397366
P60903	0.145279908	0.06657819	-0.162429111	0.037871137	0.162125257	0.166753395	0.217153452	0.003416016
Q2TAA5	0.057578855	0.010068817	-0.005829685	0.925310828	0.041472014	0.411969953	0.378697814	0.00342102
Q8TBC4	-0.008421523	0.869473306	0.071806758	0.208652905	0.056597531	0.290584033	0.1096608	0.003435811
P62136	0.071707782	0.003801867	0.041116222	0.297745502	0.120135331	0.01849369	-0.105401065	0.003440729
Q71UI9	0.009147063	0.849737887	0.030450212	0.275739985	0.044627044	0.00652116	0.162470578	0.003475803
Q9GZU8	-0.126207571	0.16372596	-0.050506543	0.335764072	-0.05239114	0.559370436	-0.224858859	0.003499733
O43760	0.013949861	0.759175567	-0.025333225	0.581909726	0.056961937	0.448505456	0.211493217	0.003505267
Q9BY43	-0.082957684	0.069686484	0.019573728	0.612323961	-0.015138437	0.815168401	-0.182573714	0.003545541
P60709	-0.126002064	0.210577463	-0.047364431	0.69474111	-0.055555474	0.566171199	0.62487305	0.003568121
O75695	0.013024934	0.846646908	0.000407724	0.981930595	0.117969965	0.087863385	0.175597247	0.003574608
O60506	-0.034239466	0.368769268	-0.009344587	0.780713341	0.061550136	0.049777958	0.206328526	0.003588436
P08134	0.010038453	0.910098392	-0.104105848	0.140501345	-0.080869467	0.260284656	0.46177562	0.003589423
P00352	-0.285725471	0.010876713	-0.28291462	0.069052729	-0.116237659	0.161599657	0.537255841	0.003609072
P18859	0.243235014	0.381019757	-0.13023198	0.428140613	-0.364346505	0.058973676	-0.852206521	0.003620141
P27487	0.052945721	0.161963424	-0.016818995	0.576619488	0.044223051	0.494935382	0.1700259	0.003628049
P15104	-0.084755126	0.054509869	0.020360443	0.708511155	0.043587905	0.418728292	-0.148063137	0.003636262
P40763	-0.049272148	0.183299036	0.010633818	0.839197168	0.044828494	0.250506264	-0.204091096	0.003649784
Q9NRZ9	-0.009701198	0.868093679	0.335011346	0.161192857	0.007835553	0.969095516	-0.773191747	0.003659131
P49888	-0.06776075	0.568089294	-0.151096227	0.061759427	0.100940489	0.327153845	-0.318663192	0.003659605
P62258	-0.027831473	0.066483707	0.030958497	0.026159187	0.018407487	0.417785014	0.114455374	0.003664335
P60983	-0.040433011	0.017905289	0.071883207	0.345331174	0.03332066	0.354057613	-0.113470454	0.003675611
P27448	0.023587894	0.822919442	0.006296596	0.943598277	-0.022366891	0.806472397	-0.255142742	0.003683721
Q15046	-0.041768819	0.095645896	-0.011050325	0.506214658	0.046019063	0.073154399	0.090415485	0.003700098
Q92544	-0.021733262	0.558669028	-0.077769392	0.295352026	-0.027320015	0.414965452	0.325707871	0.003703073
O14949	-0.01741525	0.487287372	-0.005219596	0.871616556	0.071510716	0.043052179	0.068148478	0.003709317
Q71DI3	-0.141568924	0.178631095	-0.137754662	0.04711964	-0.005334787	0.96183827	-0.846290148	0.003729921
P35579	0.000417065	0.980052348	0.062503734	0.024468289	0.002117513	0.901064156	0.159854128	0.003737694
P63208	0.08191711	0.125576806	0.011775659	0.705928061	0.006662918	0.837246941	-0.151167426	0.003781317
P50995	0.023285972	0.487712978	0.016953929	0.722908025	0.060009095	0.407689599	0.155411453	0.003782806
O43809	-0.011998016	0.663176222	-0.015301611	0.670962395	0.078054507	0.024099854	0.109266882	0.003793637
P68104	-0.059120513	0.108086374	0.005896337	0.917316801	0.000693175	0.977934506	0.189455837	0.003799408
Q07326	0.20795405	0.016762471	-0.016596995	0.792039167	0.203234559	0.016255036	0.14119637	0.003809647
Q9N2I2	-0.030211684	0.891083496	0.523008566	0.00750372	-0.473748845	0.00693764	0.571130904	0.003809906
Q31612	0.030154866	0.800052658	-0.057533921	0.543801656	0.007192976	0.918098307	-0.410197179	0.003842991
P41567	0.027125901	0.598066705	0.014507284	0.764044499	-0.049375436	0.012101473	-0.298338641	0.003851058
Q96S97	0.461606829	0.000739545	0.426779252	0.001686519	0.099306869	0.068536597	0.409106827	0.003911707
Q9UHR4	-0.072100276	0.019629494	-0.068395747	0.021795329	0.094197685	0.112684351	0.242829767	0.003913673
P45880	0.000137134	0.997397606	-0.005876318	0.897021354	0.040417693	0.167377057	0.240244468	0.003923156
Q9UQ90	-0.046268173	0.479689147	-0.119421974	0.236562889	0.116260831	0.125462884	0.543838946	0.0039343
O75369	0.037149602	0.308893521	0.016749434	0.229642247	0.054563781	0.217687401	0.144471564	0.003951697
Q9UII2	-0.084699898	0.381104316	0.045104352	0.705590707	-0.003321279	0.966097339	0.288261275	0.003956432
Q9C002	0.058857558	0.044988746	0.042763473	0.576466154	0.041150841	0.657524589	0.331521159	0.00395766
Q96PE7	-0.007307855	0.943140051	0.030025547	0.816579819	-0.115796808	0.266114172	0.355172411	0.004007855
O75506	0.107621044	0.282210173	-0.070567191	0.516289871	-0.109985437	0.034480436	-0.395976744	0.004011943
P50995	-0.055009103	0.526855772	-0.034837367	0.47839373	0.090906197	0.021368699	0.254284751	0.00401655
Q8N1F7	-0.036702986	0.017599031	0.007148474	0.82186901	0.015143622	0.625734095	0.113657245	0.004016918
P07311	0.017751893	0.670553844	0.097516463	0.085028734	-0.001670002	0.940424416	-0.204137194	0.004020956
P84103	0.003335411	0.878292001	0.001592672	0.856054126	0.072407178	0.110550484	0.075192408	0.004025933
Q9P270	-0.003760464	0.925777987	0.002389662	0.967909662	0.082983461	0.189169489	0.261015607	0.004068256
Q14192	0.172985227	0.28083612	0.261993835	0.045566458	0.067853451	0.572939094	0.451438199	0.004104678
Q96RT1	0.098919995	0.018044723	0.001465519	0.916611924	-0.038987547	0.070970279	0.184251804	0.00411877
O43815	-0.020822022	0.765016126	0.071926371	0.499976197	0.107638915	0.13533634	0.334648272	0.004128583
P04003	-0.043348905	0.651270996	0.020523315	0.803340909	0.024985924	0.736083861	0.130491384	0.004147094
P07099	-0.053964307	0.333171518	0.176324451	0.000776243	-0.006648039	0.869245009	-0.149214214	0.004171592
O75880	-0.118355386	0.057896517	-0.002447928	0.970980119	0.12416579	0.140919712	0.194614324	0.004183517
Q01105	-0.122987742	0.07748325	0.052269454	0.513403031	0.080231106	0.08338666	0.484445522	0.004196617
P11177	0.021598376	0.452064986	0.052812331	0.067806996	0.028867959	0.102853931	0.141339499	0.004206961
O94826	-0.02625717	0.354324098	0.005175469	0.864203789	0.022487323	0.562620345	0.116191496	0.004218225
Q15014	-0.016048705	0.77015449	0.264504157	0.032722256	-0.178775187	0.08964399	-0.572141019	0.004228916
Q9UIA9	-0.015090824	0.524108663	-0.008403991	0.689985925	0.044669834	0.123741357	-0.08431799	0.004236648
Q7LG56	0.032900742	0.566090613	-0.065971093	0.521331961	0.00234663	0.981983506	-0.409716802	0.004253012
Q99623	-0.045068506	0.024940146	-0.011310572	0.647926882	0.028703805	0.556445644	0.125778429	0.004265244
Q99996	-0.070930491	0.122122199	-0.003137377	0.956655752	-0.011945975	0.848195989	-0.227119142	0.004293239
Q9NRF8	0.007144682	0.755385974	-0.001101157	0.959637835	0.035569344	0.041919192	-0.123411037	0.004335182
P20645	0.067683372	0.00261101	0.04563493	0.088630699	0.016332427	0.696242971	-0.117364905	0.004433897
Q8WUH6	0.073611516	0.133921828	-0.028420473	0.182997635	0.253603105	0.068512587	-0.361562119	0.004487612
Q14562	-0.007120988	0.919527161	0.0169589	0.727057009	0.05161474	0.405544884	-0.206136259	0.004503929
O75600	0.067322086	0.252008946	-0.054994618	0.357368297	-0.013696207	0.901545742	-0.219131747	0.004508303
Q96DC8	0.153058647	0.05797767	0.031974988	0.582780578	0.08824425	0.051574678	-0.255499037	0.004519865
Q03113	0.078762905	0.085294732	-0.063567074	0.478244707	0.075424467	0.199719227	0.1649593	0.004521475
P21333	-0.019725978	0.532311972	0.277346295	0.001996811	0.008257573	0.397507162	0.176613502	0.004525155
O75496	-0.037740144	0.45240682	-0.185210427	0.163426402	-0.151777013	0.464957251	-0.857275385	0.004556366
Q9Y4D8	-0.040784087	0.685575877	-0.074662138	0.14257737	-7.16069E-05	0.99931128	0.513583411	0.004563038
Q99959	-0.020525002	0.358326149	-0.043081585	0.044454514	0.053771864	0.157561837	0.144473962	0.004578579
Q99497	-0.042109098	0.151300928	0.018458522	0.640905252	0.012246951	0.634293192	-0.127726827	0.004589882
Q8N684	-0.045212791	0.094140761	0.057041419	0.25283623	0.03641975	0.228734872	0.096391594	0.004590054
P51798	0.024443625	0.568125982	-0.026366818	0.683233736	0.108291472	0.035124315	-0.215596301	0.004600798
Q9Y2X7	0.08990973	0.089910411	0.010888769	0.85144849	-0.007673316	0.760223512	-0.285447581	0.004609422
P27695	-0.014367275	0.480273327	0.068154586	0.258006998	0.035325996	0.439519326	0.182044633	0.00464137
P27797	0.010719014	0.386043792	0.008080441	0.787713482	0.080172059	0.010821454	0.137154392	0.004648246
P34913	0.015207806	0.69126848	-0.041053138	0.430158222	0.03965573	0.587571905	-0.231577304	0.004654889
P11766	0.002365949	0.936074488	0.049698668	0.404702291	0.059625237	0.160485652	-0.116869142	0.004688917
P14618	0.044594722	0.523541342	0.103477054	0.048987338	0.041233649	0.635032809	0.185736534	0.00469572
P30405	-0.060551756	0.202213509	-0.10991332	0.060684829	0.051620514	0.189348272	0.427340058	0.004708563
Q99962	-0.060276282	0.400490323	0.081565531	0.571474455	0.066271941	0.522223905	-0.411610146	0.004721473
P36957	-0.057176781	0.275218599	0.004076757	0.933950791	0.031439627	0.041553963	0.251801321	0.004789018
Q7Z406	0.058975308	0.262870384	0.037606653	0.279952392	0.004992123	0.921051929	0.198367721	0.00481308
Q9NUP1	-0.82509016	0.039358775	0.055656487	0.546335598	-0.085332319	0.305150502	-0.209757574	0.004884947
Q9NP81	-0.007693571	0.825157112	-0.001960262	0.93053356	0.069423458	0.009936466	0.117265289	0.004950163
Q9UK22	0.140678629	0.088365625	0.006571691	0.809398763	0.06506476	0.503801382	-0.229486095	0.005027437
P07339	-0.008537452	0.735198008	-0.056020115	0.027400862	0.036396157	0.215454496	-0.163901631	0.005043767
Q9H9J2	-0.055158779	0.131154557	-0.035585271	0.390523448	-0.016092509	0.647977418	-0.093718339	0.005047331
Q12788	0.027209616	0.484861107	0.072526459	0.254191597	-0.04354568	0.421232363	0.147630973	0.005062121
O75323	-0.023493302	0.498467983	-0.041437067	0.308792245	0.099497812	0.006410512	0.133243152	0.005085485
Q969E8	-0.047106713	0.669067742	0.190099227	0.282068528	-0.130903081	0.227653096	-0.3740164	0.005176735
Q8WWI1	0.033731375	0.425728997	0.042625011	0.061611072	0.029856646	0.276651265	0.065563005	0.005182703
Q08J23	0.009212009	0.803387657	0.097491333	0.005339778	0.031403808	0.137502052	0.140559186	0.005192626
Q9BU89	0.002912019	0.95074923	-0.076431324	0.238403458	0.012051959	0.870826389	-0.144157531	0.005193698
Q8N4Q1	-0.014023482	0.84102628	0.029529776	0.533864243	0.052628735	0.62207206	-0.116490913	0.005199132
P04406	0.01112402	0.737605377	0.034262337	0.22607389	0.058863395	0.431463447	0.12507704	0.005199432
Q96B97	0.111891551	0.095899617	0.069949775	0.311656958	0.117180531	0.331727163	0.123379084	0.005232112
P46976	0.028121843	0.786931851	0.441500926	0.200237766	0.168115424	0.123075288	0.63106491	0.00524144
P20711	-0.022681035	0.558768961	-0.077544986	0.217390523	0.006462845	0.918229804	-0.196066802	0.005252929
P05783	-0.066809291	0.006441997	-0.045732428	0.27287008	0.031487003	0.243096433	0.359136243	0.005263508
P43304	0.02361725	0.472286564	0.007585645	0.756448113	0.060045637	0.018964803	0.175591725	0.005275869
P40429	-0.030460064	0.274409526	0.040255885	0.143770721	0.018862047	0.755142799	-0.099200615	0.00528902
P15260	-0.034585912	0.451667936	0.01486604	0.741217691	0.058552433	0.129471883	0.449119775	0.005303711
P07910	-0.03523097	0.323287986	0.031159399	0.421713988	0.049058465	0.304560845	0.163126899	0.005305865
P13861	-0.025042895	0.433386917	-0.000434187	0.859384545	0.027926459	0.23417152	0.174910976	0.005381553
Q13617	0.008767412	0.682658272	-0.037936187	0.097051433	0.077372619	0.003025548	-0.094578825	0.005395885
P08195	-0.087499407	0.007244567	0.173950092	0.002057078	0.004911311	0.684507253	0.172758888	0.00540953
P62136	0.031126406	0.493199504	0.048029829	0.374764467	0.071127394	0.001003673	0.105307245	0.005420955
Q9H9Q2	0.005593638	0.88208919	0.012575517	0.892005923	0.039013764	0.735831752	-0.274779798	0.005426426
P33316	0.006420295	0.856318737	0.1931728	0.008418499	0.000965119	0.973914021	-0.161145861	0.005452955
P23443	-0.002261861	0.97365985	-0.000196395	0.998640383	0.022004298	0.86254079	0.188908881	0.005504379
Q04695	-0.061546559	0.229186094	0.293305757	0.013182011	-0.062501229	0.261181615	0.272546973	0.005508807
P30876	-0.03147397	0.359586195	0.007516644	0.690884229	0.030207582	0.335823322	-0.173511056	0.005571332
Q96GQ7	-0.04359911	0.071299241	-0.006169368	0.727716967	-0.017525436	0.649950418	-0.192207642	0.005586459
Q9NP72	-0.021172736	0.428415664	0.013820895	0.452339742	0.058644835	0.123211176	0.179211947	0.005588226
Q96HE7	0.14154195	0.339512849	0.091690777	0.129996007	0.08603789	0.601199062	0.296774042	0.0056131
Q9Y606	0.018498408	0.725447151	0.060261517	0.208757906	0.05529346	0.24273195	-0.170286375	0.005637041
Q58FF6	0.135915223	0.366081538	-0.023254486	0.890136777	0.261624958	0.075745222	-0.376487706	0.00566896
Q9UBS4	-0.078854078	0.103577159	-0.069065173	0.24930127	-0.016063679	0.805620316	0.38622892	0.005678544
P61457	-0.01286063	0.771306667	-0.059295835	0.161686346	0.042425798	0.178247812	-0.177193189	0.005723723
P05091	-0.001028649	0.951957483	-0.041024219	0.042687688	0.047880408	0.045635569	0.109577427	0.005741015
Q9UHB6	-0.025025597	0.170267552	-0.029968459	0.032512474	0.033405861	0.458695665	0.078630275	0.005752954
Q99447	0.068909679	0.04309648	0.024980633	0.313704516	0.069973743	0.156397725	-0.154944866	0.005792981
P84101	0.083998073	0.721805834	0.030317462	0.857325153	-0.032741256	0.887060683	-0.816819508	0.005794351
Q8WVI0	-0.012771538	0.923721814	-0.067745187	0.409874322	-0.088678478	0.309285547	-0.359466281	0.005799124
O43493	0.00671824	0.88417564	-0.004810219	0.897592668	0.039474211	0.320587643	-0.381949682	0.005801299
Q9BXJ9	-0.071092464	0.20658773	-0.101841004	0.303863655	-0.021464949	0.753693636	0.189617168	0.00582822
P62987	-0.001390838	0.977142365	0.009565335	0.882796048	-0.023331366	0.584104218	-0.132651522	0.005870191
P51572	-0.056787536	0.177053264	0.010932696	0.641414986	0.00564738	0.715206442	0.28922971	0.00587392
P36639	-0.060482783	0.100914287	0.036255908	0.582592501	-0.103081228	0.264243383	-0.325132796	0.005883531
Q9H9B4	0.033100297	0.249712439	-0.007699897	0.849915161	0.045109624	0.176023544	0.202473495	0.005892771
P05166	0.062249781	0.225736181	-0.006296415	0.668463779	0.066646969	0.080146199	0.081576046	0.005897945
P49792	0.07902236	0.651723558	-0.143490273	0.530024165	-0.038259494	0.873569433	-1.295280517	0.005920538
O75390	-0.012341182	0.490777535	0.008345554	0.400972957	0.054031041	0.001675275	0.178580843	0.005921927
P50895	-0.037520808	0.121580867	-0.039207572	0.226052024	0.03354326	0.335763167	-0.213501067	0.006007202
Q9H974	0.025286791	0.677705851	0.076120665	0.407156979	-0.142625024	0.137514965	0.24401643	0.006041607
P15497	-0.172579309	0.14076839	0.375621429	0.01236448	-0.009498724	0.928840921	0.555715046	0.00604511
Q9HBL8	-0.100857055	0.031832433	0.174927786	0.045749611	0.031070733	0.294896265	-0.419174936	0.006053508
Q9BRT3	-0.040592504	0.437596063	-0.044710324	0.440305757	-0.033687601	0.069492559	-0.228708377	0.006054574
Q99795	0.184309834	0.225231186	0.149604055	0.151777698	0.087317566	0.617793411	0.457985795	0.006118752
Q9NWT1	-0.013395098	0.797257056	0.044009153	0.472632775	0.067444114	0.440173962	0.110082714	0.006134586
Q9NVV4	-0.001671058	0.969462163	0.088637632	0.014687108	0.069096906	0.078265489	0.247191659	0.006149001
P28800	0.039192754	0.612925512	0.3349494	0.266294115	-0.051375864	0.546540677	0.22417785	0.006153041
Q96A00	0.030205999	0.780482312	-0.221620753	0.029267952	0.002831241	0.975269854	-0.500781978	0.00616034
P09012	-0.023902643	0.508481812	0.000883424	0.975905399	0.032269608	0.337797305	0.131495044	0.006185712
P35637	-0.045087145	0.325832176	0.024558021	0.48301862	0.06382024	0.099216861	0.226995366	0.0062057
O75110	0.013043002	0.740777364	0.025627226	0.429272273	0.018125471	0.42479627	0.173601026	0.00621932
P51784	0.112539981	0.266920494	0.02009519	0.702267672	-0.079827098	0.621322647	-0.37854921	0.006231084
P23368	-0.025292855	0.775367407	0.00359074	0.959267146	-0.075622602	0.222233784	0.372670997	0.00627679
Q7L1Q6	-0.063787167	0.005383442	0.123854918	0.001010344	0.051569883	0.069677057	0.113580969	0.006299375
O95373	-0.035383901	0.115309576	0.084564738	0.001713148	0.061654658	0.065688309	0.161274528	0.006332822
Q86TG7	0.008944788	0.761429728	-0.002340363	0.899951574	0.029946506	0.550122626	-0.272270076	0.00634789
P26368	-0.019444649	0.399876495	-0.011124732	0.713255979	0.029983693	0.275960787	0.084859991	0.006350748
Q6PIF6	0.088723775	0.053610303	0.03336638	0.457830155	0.032615571	0.581661719	0.153823294	0.006375106
P17844	-0.088033863	0.091439287	0.035872112	0.416506745	0.061026933	0.112983	0.234199057	0.006419184
A0A0B4J2D5	-0.042739338	0.421604492	-0.031763552	0.607339479	0.025154966	0.58668286	0.12230532	0.006431065
Q9BTM9	-0.069132566	0.491316901	-0.021748395	0.840264903	-0.047429303	0.660787562	-0.35821369	0.006434534
P05067	-0.008114295	0.85225464	0.141034557	0.181967761	-0.015624029	0.790873905	-0.208512077	0.006440048
P54868	-0.00937317	0.923626329	0.041199664	0.508313352	0.093326651	0.216010338	0.234770745	0.006453816
Q96GD4	-0.025172568	0.661488501	0.046490179	0.194440355	0.079913822	0.580432364	-0.785775346	0.006489212
O75431	-0.038950826	0.295558382	-0.006322174	0.861008159	0.081587981	0.087161269	0.236806915	0.00654304
O96028	-0.098565973	0.231379571	-0.160126236	0.181255986	0.220249226	0.055834122	0.339503837	0.00654953
P35637	-0.036668014	0.478921513	0.053870713	0.433241777	0.027206473	0.160785367	0.127490167	0.00655051
Q7Z2E3	0.012199808	0.898752147	0.005256839	0.960383526	0.134034276	0.11803674	0.2307471	0.006567241
P09493	0.042728227	0.190908779	0.055342326	0.081194932	0.021889285	0.798283219	0.167111063	0.006567855
Q9H900	0.026404821	0.794271896	-0.021436465	0.779881826	-0.050615881	0.291599102	0.14893949	0.00657355
Q96AQ8	0.170407314	0.005485717	-0.014796898	0.849262431	0.065301866	0.352313035	0.348631974	0.006586738
Q9P1F3	-0.228124716	0.04035396	-0.161757134	0.087867599	-0.092589724	0.091552524	0.363130399	0.006588681
P55084	0.005311631	0.849780073	-0.005224424	0.797687231	0.034497464	0.136196431	0.127660466	0.006604076
Q9NV06	0.182119522	0.32978888	0.017164111	0.859100351	0.071092994	0.159595801	-0.506189573	0.00665908
P62328	-0.121589207	0.610040333	0.077141084	0.730144534	0.091844838	0.350462894	-0.406488236	0.00671448
Q96EB1	0.219588728	0.093166389	-0.027076745	0.777490702	0.053898794	0.508653514	-0.3489495	0.006749834
Q13162	0.014677193	0.436241833	0.07817992	0.036789884	0.067867949	0.054385762	-0.095504547	0.006783697
Q8TBA6	-0.076026784	0.471640313	-0.155929239	0.00160277	-0.077224161	0.256425567	0.310390164	0.006798229
P20020	-0.013749174	0.75549406	0.045304163	0.43766839	0.075347766	0.078885986	0.209420507	0.006827056
P25705	-0.031344933	0.128229332	0.003000564	0.845943026	0.009444917	0.842509167	0.09369848	0.006854959
Q53EL6	-0.092553976	0.055488862	0.092782694	0.144067752	-0.02329408	0.804451108	-0.405348558	0.006861731
Q5JTJ3	0.191703456	0.017514919	0.044791888	0.822943555	0.004294068	0.957599116	-0.475995064	0.006877932
P62136	0.009555706	0.527925957	-0.01855498	0.5553047	0.006366208	0.798674398	0.098839096	0.006890519
Q8WVY7	-0.08858618	0.073477143	0.072098051	0.10080758	0.055023368	0.414312726	0.127074442	0.006975751
P46821	-0.023484945	0.458135371	0.25580198	0.0085197	-0.023463596	0.503889762	-0.144692078	0.006992977
P24928	-0.05638986	0.070071215	0.043432695	0.193914066	0.014690348	0.742980826	-0.251394554	0.006999897
P09467	-0.163742665	0.075628357	-0.238175961	0.196580989	0.104027462	0.59185376	-0.371753879	0.00706967
P13498	-0.140073579	0.386185083	-0.125421205	0.430353568	-0.010745478	0.758388993	-0.563948848	0.007070671
O15381	0.098709253	0.56591947	0.019730213	0.801176618	-0.072275041	0.181949234	0.524709361	0.007072779
Q16891	-0.028726812	0.047280611	0.010731288	0.513276756	0.044577247	0.236911818	0.124341537	0.007131097
Q9UQB8	0.041262935	0.663016727	0.053270162	0.334973418	0.024541661	0.673610096	0.248674613	0.007137228
P04818	-0.142920065	0.431976047	0.179325606	0.071408795	-0.009759401	0.803730714	-0.51406926	0.007194778
P00505	0.021679472	0.316923679	-5.15118E-05	0.998083612	0.081446078	0.0235086	0.134799033	0.007257661
Q9BUT1	0.04660228	0.23104207	0.040095207	0.593107091	0.096911043	0.139297852	-0.219079705	0.007282358
Q02818	0.102641802	0.17119339	0.044725448	0.41222505	-0.138908496	0.040901873	-0.338984634	0.007292393
O75521	0.019539922	0.740324385	0.049960846	0.384567883	0.009106274	0.88915305	0.206621274	0.007293253
O95235	-0.115979084	0.459254675	0.127673358	0.118730934	0.060242232	0.014677149	-0.430605013	0.007305755
Q13885	0.042828181	0.173780967	-0.007242283	0.768268682	0.102724274	0.002016568	0.224482907	0.007332575
O14579	-0.030194142	0.691814119	0.02761208	0.396755561	-0.027442788	0.482584889	0.197496596	0.007334616
P42226	0.019917459	0.484207438	-0.059366529	0.152351909	0.061885628	0.216338427	-0.137511305	0.007347849
P42566	0.039734876	0.447754401	0.059542504	0.223064401	0.045497128	0.207356051	0.115534393	0.007373285
P32320	0.100621042	0.044983652	0.090267272	0.300599131	0.024874048	0.805561382	0.133188579	0.00737517
Q8N6M3	0.002707205	0.972738926	0.040425176	0.654676107	0.078360313	0.29594133	0.242073531	0.007413998
Q14728	0.065742267	0.394424793	0.03350021	0.496983669	0.10991645	0.246376969	0.154277025	0.007431654
P52758	-0.04060323	0.60762062	-0.039372961	0.447323468	0.078181926	0.072417415	-0.137116465	0.007453051
O14578	0.036382751	0.866115611	0.100125424	0.62034346	0.012801269	0.921327144	-0.849589627	0.007479394
Q9NVS9	0.036378286	0.407604186	-0.00128613	0.963795044	0.02676815	0.533750509	-0.187940285	0.00753617
P98170	0.056928032	0.204783824	0.162631029	0.026292373	0.150804521	0.100548116	0.233269746	0.007556025
P52597	-0.035473385	0.36074253	-0.019878287	0.043320667	0.058104288	0.004021452	0.107207661	0.007579393
Q96GZ6	0.063215144	0.502276904	0.136111126	0.032698583	0.051656676	0.61997214	-0.320431269	0.007626902
P60709	0.054432663	0.122990385	0.014848824	0.527540487	0.000724048	0.987401908	0.260265029	0.007653347
P25208	-0.114303653	0.064255927	-0.092480829	0.19509228	0.01092731	0.927876919	0.409518919	0.0076939
Q03113	-0.016989204	0.634567754	0.109222069	0.006071691	0.062242376	0.063048392	0.184541447	0.007724711
Q14554	0.092913289	0.033959933	0.035136123	0.449859063	0.055409142	0.083369163	0.1090236	0.007728416
P51553	0.029911055	0.035091365	-0.013959335	0.6159586	0.031632207	0.33668788	0.211964675	0.007729557
O95202	-0.055850013	0.006438392	-0.019029456	0.505966546	0.045629193	0.243015097	0.078619203	0.007818455
O95786	-0.040885365	0.574894535	-0.024330395	0.76402985	0.152622265	0.194436459	0.211319743	0.007834871
Q9Y6G9	-0.004434019	0.847053947	0.006284194	0.758315786	0.047253994	0.104790858	0.086266285	0.007841678
Q96ST3	0.038688943	0.088047969	0.006726747	0.854051596	0.049507068	0.509764844	-0.139318501	0.007918072
Q9HCN8	0.023626283	0.585790608	0.019825955	0.51519355	0.019957523	0.711511042	0.175500529	0.008010433
Q15233	-0.022863107	0.080572283	0.043350521	0.163150692	0.053862403	0.217299105	0.076012418	0.008026199
P37059	0.091310932	0.499899969	0.061996639	0.40553232	0.149283227	0.129772084	0.32584562	0.008047333
P62745	0.190635754	0.014983617	0.321018001	0.062112183	0.07897053	0.592277723	0.362036654	0.008052603
P67936	-0.03414971	0.47722955	0.058569898	0.339466939	-0.003034824	0.957595736	0.104791056	0.008130057
O75845	-0.015543469	0.832367433	0.09661939	0.137972807	0.025642436	0.427211593	-0.10510542	0.008155672
Q9UL46	-0.068188931	0.096676112	0.016080353	0.749454589	-0.021990493	0.573609694	0.147990973	0.00817473
O00159	0.002155129	0.919956437	0.045885033	0.01983618	0.048132313	0.173159186	0.096462073	0.008175066
Q4KMQ2	0.03385319	0.425546657	0.019803198	0.627647166	0.079842748	0.036914138	0.152377495	0.008219857
Q16181	-0.018619146	0.65339146	0.027268258	0.520628093	0.046729297	0.100984469	0.153375484	0.00827203
Q9H0U4	0.0243283	0.714236524	0.051817661	0.483080582	0.056295644	0.336519142	0.165599159	0.008310697
P00813	0.006482016	0.907646583	-0.010711914	0.760519736	0.054978506	0.620667615	0.302029685	0.008311806
Q96GX2	-0.143582714	0.026865828	0.07215713	0.400986559	-0.097858524	0.41109736	-0.608382602	0.008322109
P27707	-0.069328261	0.118767496	0.031441917	0.217080369	0.047262343	0.216886762	0.117979236	0.008374074
P52907	0.027943312	0.379754281	0.044840147	0.03231373	0.060986492	0.021835899	0.106447549	0.008389982
Q6ZSJ8	-0.006890192	0.912224045	0.024850623	0.804218745	-0.04407877	0.758428337	-0.366302379	0.008397302
Q9BWJ5	0.067611278	0.337300623	-0.077503811	0.435200615	-0.021497256	0.734461202	-0.339566494	0.008448206
Q9BQ04	-0.038634441	0.20277154	-0.042020642	0.265463988	0.033200739	0.201161157	-0.12527374	0.008502465
Q8N6S5	0.070331354	0.236286894	0.111216041	0.052748526	-0.048218961	0.369868233	-0.210143329	0.008505466
Q6KB66	0.322385018	0.321994884	0.894095406	0.021997008	-0.013123573	0.922360503	0.494165626	0.008511283
O76031	-0.049476263	0.250265903	-0.018118995	0.535658321	0.066365371	0.270133928	-0.161101446	0.008515444
P62070	-0.064046287	0.445003975	0.004328082	0.908038307	0.039150104	0.526992739	0.240687584	0.008574493
Q14738	-0.072141631	0.135491478	0.010994971	0.853398632	0.092611971	0.172363386	-0.137115648	0.008586748
Q96I45	0.13158845	0.219574609	0.186297675	0.100127452	-0.104032357	0.592710936	-0.496874643	0.008587917
Q9UBT2	-0.050756803	0.063859272	-0.005595342	0.897318797	0.044021827	0.127964102	0.110579783	0.008594086
Q6PIU2	0.073760359	0.113078254	-0.019409579	0.687499458	0.079860723	0.253435739	0.178455944	0.008602708
Q9H6Y2	0.009496456	0.906912552	0.037710173	0.393968099	0.017600331	0.816422759	0.332681614	0.008670914
P13726	-0.087982752	0.584520317	-0.048247591	0.492127783	0.173926889	0.035723943	0.523566437	0.00867104
Q12797	0.03050619	0.497730406	0.263559193	2.87662E-05	0.043255044	0.221795401	0.374581085	0.00870157
P42126	0.026489821	0.320227226	-0.048681438	0.010706616	0.066552436	0.012677996	0.099485102	0.008706517
Q15118	0.13830481	0.408192698	0.141235233	0.133119365	0.052459375	0.760302403	0.297911259	0.008767036
Q9Y294	-0.073207349	0.214810842	-0.055293442	0.367886511	-0.055687247	0.51773259	-0.394738221	0.008801624
P05787	-0.005755427	0.872113834	-0.032719592	0.161471913	0.045027906	0.413423178	0.255222549	0.008807557
Q96DA6	-0.05834655	0.414909949	-0.033964597	0.399386668	0.06753047	0.144732046	0.229913331	0.008847683
Q9H6V9	0.079753841	0.224547463	-0.011384594	0.714545746	0.048005196	0.001881835	0.141165302	0.008904252
P08263	-0.104791018	0.405212405	-0.13696946	0.132683537	0.017417289	0.884646827	-0.429044142	0.008905351
Q8WV99	0.041338256	0.735415155	0.075490105	0.073742561	0.063448755	0.346606833	-0.383694718	0.008933561
P34896	0.014562217	0.771404914	0.050216847	0.212655916	0.023790328	0.10022268	-0.181642491	0.008954249
P34897	-0.007281459	0.801116452	0.046180884	0.023430013	0.046615848	0.235873036	0.076858666	0.008962579
P42766	-0.118339828	0.006506066	-0.018108428	0.596493945	0.039610414	0.372878784	-0.353320936	0.008995822
Q8N4T8	0.109022601	0.14225211	-0.154224714	0.367320413	0.046440794	0.681838292	0.499202253	0.009006612
Q15067	0.012664358	0.663877669	0.039993606	0.0077418	0.030389481	0.393506604	0.171390272	0.009014933
Q9ULC5	0.125796536	0.201947794	0.075523285	0.043600907	-0.011175626	0.888161097	0.254196516	0.009077185
Q13643	-0.08161058	0.236920899	0.218193367	0.267832308	-0.159791638	0.098436142	0.286776697	0.009121393
Q9H9S4	0.136397737	0.068202088	0.07361999	0.050773731	0.130873359	0.015085506	-0.44445447	0.009121428
Q9Y6N1	-0.136063368	0.265744796	-0.030177267	0.691471584	0.14273376	0.054674722	0.263202944	0.009123723
P62269	-0.013071325	0.655229598	0.034081172	0.297919839	0.057308907	0.10145223	0.079379571	0.009159753
A0MZ66	0.009418811	0.735583574	0.038138117	0.11153655	0.037429646	0.018492921	-0.153992889	0.009174557
P27449	0.083006785	0.019905867	0.037690031	0.43939888	0.169989196	0.000573524	0.144939343	0.00918028
P84090	-0.023064843	0.519638731	-0.041484273	0.560635164	0.060502108	0.213856926	0.130029572	0.009185032
Q9BYB4	0.02351898	0.530771487	-0.114733537	0.085559246	0.067030423	0.103252739	0.103030579	0.00931803
P0DTD2	0.040581069	0.235753461	0.266253308	0.012199714	1.501846847	0.001845441	4.51655691	0.009432121
Q9NP77	-0.087315364	0.291250386	0.141900583	0.204784418	-0.219278372	0.01470047	-0.222102404	0.009467123
Q86WX3	-0.088378804	0.164005267	0.002047279	0.928946829	0.030484708	0.727198881	-0.218425573	0.009480706
Q92908	-0.134425397	0.289073281	-0.076715813	0.686106604	-0.473767988	0.119076833	-0.399037155	0.009483025
Q9Y520	-0.028059056	0.523986578	0.01227972	0.766378941	0.013505845	0.78521324	-0.156094955	0.009498165
P0DTC9	-0.045199238	0.583521966	1.145207417	1.68048E-05	3.055486879	0.000673499	5.970873221	0.00952751
P30039	0.083912521	0.110824667	-0.078244625	0.056703191	0.02297028	0.683635659	-0.205097909	0.009541032
Q8NGA1	-0.055815492	0.195714631	0.099319927	0.353040507	0.114677188	0.09210927	-0.208799553	0.009551292
Q8NFU3	-0.353280754	0.054666365	-0.094040485	0.628569187	-0.080453976	0.685570029	0.985258272	0.009582147
O75874	-0.081429961	0.075301618	-0.018695973	0.458294747	0.072687958	0.287375193	-0.217898323	0.009603169
Q9ULC5	0.12940462	0.425020352	0.080350499	0.666812734	0.092913215	0.055898936	0.384046503	0.009646301
P61224	-0.053850066	0.160976072	0.011695952	0.869279916	-0.000721297	0.988028461	0.286799942	0.009725724
Q99757	-0.01054649	0.574821397	-0.045838977	0.407563241	0.006076238	0.902392337	-0.083553747	0.009727634
Q8IVD9	0.022455063	0.565014827	0.001639798	0.970765015	0.056836936	0.446095493	-0.176444045	0.009769101
P02787	-0.029281619	0.420168406	0.073972913	0.346043178	0.271203165	0.092318537	0.571149664	0.009770045
P17900	-0.000736561	0.990411632	-0.041825253	0.128063268	0.142067468	0.056038848	-0.185291871	0.009790184
P16403	-0.130433778	0.242455336	-0.108814367	0.169876999	0.186404587	0.067151653	-0.540430896	0.009801686
O15498	-0.021863759	0.449243563	-0.049661617	0.178704302	0.05064326	0.097912425	-0.101055747	0.009863434
Q9Y324	0.189041208	0.150802052	-0.073488728	0.30437366	0.14529944	0.485683585	-0.459967097	0.009914845
O95571	-0.01578962	0.093073732	-0.028543045	0.141894237	0.036318991	0.110138548	0.150309141	0.009949761
O75494	-0.040342276	0.108210789	-0.001161835	0.983947747	-0.061395862	0.339036821	0.217665329	0.009957207
O43169	-0.06034232	0.168206387	-0.069123711	0.333995455	0.071716628	0.122131058	0.443742718	0.009963489
P78347	-0.044423936	0.1442864	0.008437323	0.712924333	0.04094315	0.42213822	-0.072879617	0.009986522
P54136	-0.00416264	0.769673198	0.008431519	0.765606971	0.015768689	0.660206218	0.136678242	0.0100238
Q9NR28	-0.103865586	0.186457769	0.061855674	0.043283412	0.026260466	0.224580232	0.145225425	0.010029607
P13674	0.188753051	0.291874216	0.181525938	0.103986321	0.023512155	0.918618597	0.381596426	0.010043111
Q9BYF1	-0.056175418	0.266066112	-0.001441508	0.972948515	-0.047868155	0.295088646	-0.168484556	0.010048626
Q9NYJ1	-0.087870815	0.714879243	4.725793396	0.001646302	0.093910029	0.77859959	-1.156395327	0.010222275
Q9H488	0.071105917	0.058688225	-0.033926642	0.262120875	0.084479582	0.259131685	0.169082636	0.010247373
Q5TAQ9	-0.054940332	0.48088161	0.055912109	0.60510871	0.052414591	0.468273958	-0.23979572	0.010248714
P41361	0.070843903	0.267435541	0.123952074	0.054010825	0.090117547	0.282381321	0.544243392	0.010259575
P09211	0.040813056	0.003473764	0.008204824	0.884342496	0.052548307	0.169958228	-0.100432482	0.010281986
Q15274	-0.011952507	0.611417074	-0.033905401	0.386502704	0.045088996	0.302529579	-0.121181301	0.01032354
Q01813	0.160497001	0.201554192	0.175670656	0.039820586	0.095496539	0.547685874	0.196617492	0.010375109
P57737	0.067622252	0.164626975	-0.030183145	0.350310927	0.0071566	0.658478377	-0.104087281	0.010427513
Q8TB72	-0.087204638	0.025583052	0.023602399	0.72503125	0.097241667	0.024322201	-0.143756339	0.010428876
O60271	0.057760404	0.038137397	0.023601103	0.475112827	0.033424704	0.472099995	-0.080381871	0.010431217
P53602	0.027359788	0.401091793	-0.056419686	0.155495645	0.083298898	0.1826926	0.119149669	0.010437837
O60508	0.001595373	0.96921441	-0.035053076	0.342057043	-0.001412778	0.987106924	-0.120654899	0.010449194
O43670	-0.000309229	0.993595306	0.010852253	0.708866919	0.06060365	0.016896931	0.070334478	0.010460877
Q7L5Y1	0.000107011	0.997920523	-0.059026991	0.585841639	0.067997219	0.317560364	-0.099810539	0.010477315
P43308	0.011585535	0.923059222	-0.07262332	0.546719409	-0.112928713	0.224049144	-0.648260374	0.010478763
P26599	-0.055925546	0.279657235	0.024891149	0.436811618	0.073357237	0.147354455	0.375608896	0.010506867
Q9H3P2	-0.010965391	0.794899931	-0.030991281	0.269840552	0.056911662	0.009928542	0.123257253	0.010528715
P60520	-0.081466162	0.256847305	-0.145618558	0.110324701	0.069305462	0.473683174	0.365240288	0.010546958
Q13112	-0.048331213	0.484938323	0.186009846	0.205906355	0.032462052	0.809887267	-0.310465755	0.010555851
P07711	0.167299115	0.349066096	0.009974142	0.901143772	0.105762708	0.370255151	-0.614282557	0.010556379
P02533	-0.034660585	0.610770805	0.043450005	0.449395492	0.124132408	0.132727287	0.301151486	0.010566097
Q9UI09	-0.040572163	0.651651158	0.059035272	0.449497765	0.082029593	0.282119784	0.196618735	0.010649026
O60220	-0.106757429	0.283778841	0.505721576	0.023407231	-0.114559011	0.122968998	-0.281616148	0.010653632
P60602	0.320840549	0.038264822	-0.152771613	0.247722315	0.21322539	0.100411618	-0.426963628	0.010662303
Q14534	0.063077903	0.482343836	0.07048287	0.146150609	0.044254826	0.568851754	-0.10633384	0.010694089
Q969X5	0.007136062	0.820062716	0.045040955	0.218847283	0.070078475	0.080757426	0.138957522	0.010759629
P61026	0.019516286	0.753144328	0.055877257	0.670189999	0.037919426	0.325483221	0.209122454	0.01077814
P61313	-0.066347186	0.303700421	0.015460275	0.725801043	0.058767946	0.118092666	0.496064122	0.010865849
Q9UKM9	-0.076563582	0.013045943	-0.040936902	0.129299503	0.062734288	0.124634607	0.092841188	0.010871094
O95379	0.171538934	0.021115501	0.148873389	0.004630891	0.105996421	0.396598529	0.321454506	0.010997773
P45974	-0.043169009	0.048877224	0.021240529	0.492297512	0.014908428	0.510158215	-0.073672983	0.011091273
Q9NVA1	-0.095389252	0.245425012	-0.033880083	0.729025235	-0.031570871	0.615547529	-0.388009698	0.01111171
P41208	-0.020104973	0.755476734	0.164190103	0.097656525	-0.078995621	0.315102591	-0.191578707	0.011129609
P09543	-0.068428845	0.021314576	0.020228468	0.620449647	0.07303941	0.078011876	0.127587287	0.011190254
P08183	-0.058051344	0.130226811	-0.037172766	0.357050774	0.051562235	0.245678107	0.183686851	0.011228584
Q53GQ0	0.014133978	0.649127821	0.023700372	0.646184632	0.097245776	0.006534583	0.168369028	0.011235897
Q8N183	-0.004774411	0.84315524	0.033180011	0.539604872	0.092447872	0.002988652	0.156817816	0.011289378
P13073	-0.058672173	0.130546354	-0.006108552	0.691773343	0.012235731	0.676952132	-0.108130801	0.011317878
Q9BQA9	-0.09438671	0.004700543	-0.014661247	0.820369243	0.063260552	0.214867609	0.203242729	0.011369992
O00165	0.039172399	0.759753485	-0.149760589	0.497349362	0.173432518	0.071201795	-0.471576558	0.01137844
Q71U36	0.066081968	0.058186652	-0.006775047	0.859929962	0.104738767	0.01494109	0.135495198	0.011433695
P39019	-0.045995313	0.04567159	0.075046669	0.036459894	0.061562276	0.18323928	0.068424052	0.011463367
P05026	-0.015393975	0.155372746	-0.0219478	0.627239394	-0.008517957	0.822925652	0.064613125	0.011475065
Q9H9A6	0.021341785	0.471154199	0.072902305	0.00770242	0.014158859	0.432154286	-0.156736141	0.011518384
P61966	-0.037739294	0.542576947	0.004941045	0.922667161	0.006637345	0.740311646	-0.077988464	0.011568382
Q12929	0.004701042	0.753613311	-0.010188573	0.63755899	0.076935138	0.048222157	0.117478952	0.011600719
Q8IY17	0.132412014	0.055496791	0.014545761	0.812793312	0.005183939	0.888726123	0.201120192	0.011646051
P07437	-0.059939369	0.088491513	0.012017603	0.822148818	0.071008976	0.239400079	0.120047434	0.011682308
P02753	-0.040884219	0.331755189	-0.060210312	0.362339898	0.028110105	0.76036265	-0.749828748	0.011693824
P11388	-0.051940336	0.623360239	0.079324536	0.476604086	-0.056228409	0.654222242	-0.318244454	0.011721065
Q9BXV9	0.389468672	0.072935606	0.724365348	0.059445358	0.465531866	0.021710623	-0.432260878	0.011726396
Q53EP0	0.22381531	0.106227048	0.226143911	0.149145156	0.135936049	0.227007582	0.143138287	0.011762261
Q3SZH5	0.005473169	0.921028446	0.229726893	0.103852799	-0.046394412	0.338833501	0.113774526	0.011787169
P13693	-0.038939868	0.204905179	-0.033415008	0.224239639	0.099228006	0.090506886	0.234412482	0.011794145
Q969V3	-0.041770643	0.075749058	0.007809558	0.792424075	0.016097874	0.103148819	0.155005721	0.011809572
O60476	-0.134848111	0.150409576	-0.027812827	0.756283758	0.059056689	0.250111167	-0.219735131	0.01184152
P28715	-0.089664746	0.294327101	0.349513977	0.068064409	-0.163011641	0.204854318	-0.498488119	0.011864076
Q16778	0.789427125	0.000316084	-0.421329925	0.013859374	0.675798655	0.000257512	0.181799849	0.011931948
P22732	-0.014481107	0.941613415	0.160009269	0.003060692	-0.081305365	0.625449087	0.296813021	0.011950465
P08727	-0.036850419	0.467113882	-0.078546315	0.405646676	0.078949701	0.200550142	0.207703053	0.012014878
A1X283	-0.092339362	0.391914475	0.187579664	0.05805158	0.060028499	0.503562707	-0.065927438	0.012033703
Q9Y530	0.01215322	0.844364356	-0.035603417	0.486227569	0.077484234	0.039046074	-0.235114015	0.012043828
P40855	0.123029722	0.101336231	0.059041283	0.347204552	-0.015958302	0.690381856	-0.200758539	0.012061227
Q9UJS0	-0.029017982	0.053235973	-0.034076126	0.299864253	0.065523523	0.101462166	0.08351082	0.012063578
P50135	-0.03534968	0.190569771	-0.091686282	0.027074745	0.028754069	0.267670977	-0.118395918	0.012080313
O15145	0.056185047	0.139313795	-0.028513056	0.540254589	0.085085085	0.000501677	0.130015588	0.012131662
O75208	-0.035259282	0.147707436	0.007559332	0.874261396	0.037580547	0.276438384	0.126227081	0.012201525
Q13496	-0.005661879	0.8523937	-0.122325274	0.022227645	0.022088121	0.5764682	0.17678985	0.012286852
Q6ZMI0	0.049105351	0.553507887	-0.101200318	0.001186745	0.079354337	0.357073265	0.138411822	0.01230344
P22695	0.002480184	0.933317165	0.009570633	0.7604888	0.037404283	0.262990753	0.127248028	0.012306972
P36578	-0.049882257	0.044523255	0.002375845	0.810758793	0.031388415	0.422417394	-0.148904447	0.012326899
P35580	0.003221908	0.971916961	0.03704908	0.419911046	0.063242327	0.225068675	-0.144068548	0.01234824
Q9NRL3	0.025250729	0.4108115	-0.05133342	0.173783416	0.041872048	0.105100092	0.167670717	0.012417085
P28288	0.009768661	0.683909481	-0.010985653	0.627214357	0.065516362	0.216416447	0.121182788	0.012450175
P63010	-0.015411654	0.440162632	0.00450534	0.921409822	0.026445718	0.574934847	0.076492101	0.012454369
P47914	-0.073064977	0.072183754	-0.092339332	0.00121155	-0.00048165	0.99299114	-0.42886904	0.012480558
Q9BXP2	0.048190696	0.787003756	0.053198935	0.772687228	0.010753054	0.733601915	-0.245331907	0.012492524
Q13596	-0.048079801	0.04472151	0.034453302	0.274839021	0.042895814	0.133907752	-0.123332009	0.012531148
Q8WWC4	0.004908819	0.880788543	-0.013273283	0.721719878	0.085182129	0.111988888	0.152181948	0.012551166
P0DTC3	0.033042313	0.913157531	0.513875865	0.253105575	1.568583476	0.038865886	4.552676142	0.012564587
P53597	0.019448469	0.735008334	-0.063483632	0.043110399	0.055683577	0.249660694	0.080187121	0.012654374
Q96DZ1	0.073263373	0.073313129	-0.015251104	0.70431801	0.093848011	0.14612245	0.230783855	0.012655573
O60427	-0.254435407	0.089463357	0.09869437	0.199259475	-0.125532724	0.117831008	-0.181566421	0.012682774
Q8NCW5	0.034406347	0.231743021	-0.023965082	0.094342894	0.073526616	0.059807919	-0.066338282	0.012711551
P20290	-0.109666805	0.009233898	0.0245066	0.312337566	-0.011033088	0.793081578	-0.130615338	0.012752262
Q8NBX0	0.040021937	0.542099973	0.005460833	0.866643093	0.047805971	0.407002536	0.124922279	0.012789417
P30154	-0.1007938	0.264344337	0.010890677	0.884821092	0.002157586	0.943334995	-0.280456416	0.012842839
Q96KC8	0.029760034	0.544249827	-0.013963712	0.639208158	0.012448061	0.835599152	0.168445469	0.012920473
Q9NYP7	0.032865879	0.512954469	-0.080749245	0.396367083	0.057939962	0.548136096	0.269133013	0.012933209
Q9Y5A7	-0.061266336	0.508129316	0.028535138	0.550340175	-0.048382461	0.077003764	-0.294119723	0.012947745
Q16775	0.014142716	0.591198724	-0.000472592	0.992808202	0.043619526	0.44234787	-0.179166884	0.012952476
Q9NX14	-0.103758491	0.154172299	0.00458627	0.930563132	-0.008892238	0.895853336	-0.170528961	0.012980786
Q9H3K6	-0.036179251	0.510532118	-0.045129238	0.097912312	0.028853875	0.686718248	-0.155277045	0.012992602
Q09666	0.047837031	0.683902978	0.384312145	0.008053607	0.032045198	0.807382045	-0.176683881	0.013014865
Q93099	0.056470235	0.043986661	-0.064970164	0.160477421	0.071051426	0.25342001	-0.227453345	0.01306503
P51687	0.055366244	0.12241143	0.064900483	0.075905255	0.077256325	0.174533453	-0.296685856	0.013066106
Q6NUK1	0.059602162	0.014827115	-0.024863095	0.451418394	0.059499769	0.15863156	0.171523354	0.013097275
P60900	0.018264354	0.352423229	0.030731509	0.308598855	0.072417204	0.032250171	0.079412053	0.013111267
P50213	0.013856139	0.305201144	-0.003511861	0.887818782	0.047858583	0.155641544	0.131395301	0.013127091
P23142	-0.042200681	0.635493997	0.170121264	0.018671398	-0.055841146	0.634515261	-0.407569011	0.013164207
O95858	0.042727247	0.223229326	0.012308981	0.737944086	0.074898495	0.353585585	0.271616955	0.013182079
P30533	0.084030663	0.457598594	0.284830781	0.028929457	-0.022472471	0.888786256	-0.472604536	0.013209804
O00571	0.066006315	0.082904425	0.066416433	0.237554152	0.002964036	0.944475372	-0.237261431	0.013213335
O94906	-0.055725023	0.022702128	0.02413278	0.256612695	0.005731492	0.793197198	-0.080687278	0.013218569
Q8WX92	0.088067896	0.215697243	0.00880758	0.880683293	0.00210323	0.987106292	0.171354156	0.013229652
Q99729	-0.086337692	0.386972422	0.086014374	0.405035929	0.069730035	0.410534841	0.291929936	0.013241595
P35251	-0.088396483	0.004053762	-0.013488338	0.713146948	0.010352488	0.771907617	-0.207706439	0.013255905
Q96SQ9	0.060859683	0.233722204	-0.031836549	0.215328139	0.051144078	0.148565008	0.255529932	0.013263891
Q9Y446	0.044282658	0.501508529	0.002844765	0.631785004	0.011521388	0.828272909	0.11763862	0.013276906
P53999	-0.131467067	0.011823652	0.194372927	0.001804098	-0.022262806	0.54761296	0.152363626	0.013295266
P55072	-0.017173321	0.031705383	0.055435646	0.02473228	0.027755181	0.12568894	0.071225399	0.013319977
P43490	0.031429576	0.296920617	0.011488477	0.584597366	0.067745144	0.286626697	0.100508459	0.013325051
Q07021	-0.058687886	0.307387539	0.014665243	0.805121034	0.02068407	0.668119173	0.142362661	0.013360586
P21439	-0.102990054	0.169742399	-0.058557341	0.193008608	0.099024728	0.021654113	0.125611846	0.013370852
Q6ZN54	0.080672205	0.382911336	0.128489784	0.303033932	-0.03041357	0.618607403	-0.343307358	0.01340536
P13796	-0.003504753	0.877403811	0.050978255	0.03362066	0.093547578	0.214058202	-0.108871876	0.013428859
Q96NB3	-0.07680726	0.257808415	-0.016649851	0.76106281	-0.03381251	0.583071272	0.21726721	0.013443084
Q96CV9	0.093519718	0.026622722	0.016521517	0.734998418	0.042734773	0.106288557	0.141619407	0.013443827
Q8IUH5	0.015986262	0.875489995	-0.159005555	0.132619917	0.01207478	0.851270362	-0.321849503	0.013450417
P17096	0.024286225	0.644799223	0.161040555	0.029284034	0.280805397	0.01033239	0.412256323	0.013476506
P61160	-0.033577031	0.279461861	-0.002130564	0.950420273	0.024811794	0.135706493	0.101559307	0.013505201
P37837	-0.034470687	0.041744154	-0.013365882	0.582390991	0.060752838	0.093984249	0.113481366	0.013554859
A6ZKI3	-0.076779286	0.602684203	-0.031705127	0.680449974	-0.018211246	0.85743108	-0.436324703	0.013717161
Q8N4H5	-0.059226239	0.045124839	0.00207594	0.967967067	0.007899423	0.918858738	0.142871444	0.013772503
Q4G0J3	-0.030545955	0.593160732	0.002903091	0.971423452	-0.055896634	0.407789265	-0.266619898	0.013787085
Q14108	-0.035736359	0.154785421	-0.007237421	0.65519216	0.043103232	0.300411522	0.100714167	0.013792346
Q6P3X3	-0.021584475	0.799730521	0.075638268	0.277993209	-0.003042753	0.910953909	-0.137714462	0.013873739
Q8IWZ3	-0.00266337	0.972781451	0.010637389	0.922387907	-0.077055304	0.446599221	-0.288092874	0.013883015
Q09161	-0.023362861	0.094824459	0.088861973	0.00861223	0.018380296	0.631428723	0.054135166	0.013915115
P02533	-0.012119575	0.880960657	0.115764845	0.128512462	0.09612572	0.019230449	0.241524317	0.014029559
A0AVT1	0.001687516	0.933593042	0.005784958	0.469432473	0.043468601	0.15483271	0.084702516	0.014051629
Q16540	-0.033645221	0.575258019	0.063137624	0.433281376	0.03076894	0.651353398	0.099560807	0.014053229
Q8NFQ8	0.072808205	0.088819865	0.031484852	0.410619869	0.08257286	0.396297119	-0.236161975	0.014059234
Q13501	-0.096216694	0.107192565	-0.017961633	0.747528804	0.028262546	0.653736622	0.478294129	0.014115427
P49756	-0.07180857	0.066349831	-0.019701827	0.506012152	0.030743374	0.198527899	0.129061803	0.014123241
Q9NSD9	0.017958817	0.309641635	0.002517742	0.875011608	0.057912949	0.00586886	0.075401768	0.01417111
Q13907	0.043623002	0.361758879	-0.047088705	0.256646803	0.118226316	0.034598885	-0.125763707	0.014177693
Q99436	-0.053479939	0.325010962	-0.041911731	0.231812284	0.026460545	0.327672329	0.150021598	0.014191738
Q9H0N5	-0.024495227	0.690976911	-0.102543665	0.147965237	0.056967817	0.393426393	-0.12929953	0.014196819
O60264	-0.057769527	0.076504442	0.025609497	0.214738498	0.014200132	0.786669518	-0.111130986	0.01420477
Q9UBE0	-0.067880809	0.000915609	0.013912307	0.464646411	0.04045626	0.202977518	0.094301956	0.014206234
Q9Y6M5	-0.083987188	0.181187457	0.064037614	0.029180601	-0.048427371	0.221340745	0.134707887	0.014290898
P62310	0.048077751	0.088731472	-0.01489893	0.860645286	-0.026243095	0.798511436	-0.186475991	0.014291819
O60488	-0.009175346	0.731174428	0.072260588	0.109423539	0.043122196	0.105445428	0.095233861	0.014311715
P35237	0.065636933	0.563837327	0.128547928	0.094064187	0.050763649	0.667468722	0.189288964	0.014318221
Q8N5G0	0.022089165	0.761452062	-0.050803574	0.446685537	-0.0262311	0.608594875	-0.25880397	0.01433012
Q9NPD8	-0.132823992	0.22927783	0.274077552	0.126083953	-0.200952539	0.135997077	-0.40817181	0.014344021
P58107	-0.018670946	0.613164128	0.198496916	0.000424388	-0.008995063	0.766246962	0.075836412	0.014351089
Q9P021	0.010213326	0.951635594	-0.036276069	0.639531394	0.028344054	0.73231752	-0.222899178	0.014352991
P21291	0.029092227	0.4850121	0.386103918	0.013550104	0.051304752	0.547704195	0.314896673	0.01437041
P07902	0.019926674	0.607695834	0.094584837	0.362168033	-0.052854104	0.219590389	-0.110399216	0.014371576
Q9Y5X1	0.098044404	0.29141668	0.006722415	0.917199298	0.099106384	0.118082949	0.17496527	0.014422249
P30740	0.077165284	0.24732009	0.005266247	0.907011195	0.099345526	0.22922494	0.15015562	0.014443049
P23497	-0.097755468	0.13538365	0.069033154	0.419317425	0.063776888	0.549849358	0.17136234	0.014459144
Q08499	-0.004458108	0.95015497	0.462384077	0.000425335	-0.015337266	0.769312769	0.155347667	0.01451006
Q99538	0.005349217	0.947429868	0.014714321	0.899741299	0.111917178	0.482150372	-0.431262406	0.014510838
Q9P0L0	0.018919582	0.565705844	-0.010459023	0.747001712	0.036764427	0.266547861	0.109134157	0.014560642
P49902	-0.052054462	0.210988403	-0.035347176	0.322225375	0.068692317	0.028281481	-0.086138338	0.014573945
P68036	-0.003569716	0.939518824	0.040196488	0.376299171	0.074217859	0.188673586	-0.180199671	0.014675571
Q96DR5	0.085721934	0.311992327	0.127438981	0.156886838	0.173024409	0.135654325	-0.594123526	0.014676697
P42696	-0.071999432	0.019290144	0.03284697	0.552420069	0.005783281	0.876908273	-0.319958652	0.014697028
Q15437	-0.010847382	0.827324633	0.016363003	0.65525454	0.030041503	0.694153232	-0.129783102	0.014785744
P05455	-0.062308483	0.121097299	0.053595068	0.211302303	0.019651302	0.538624103	0.154023823	0.014815913
Q9NRZ9	-0.214975463	0.140078208	0.030676754	0.871453356	-0.016948353	0.891438594	-0.517873064	0.014828446
P35241	-0.064454045	0.080621961	-0.037505179	0.245742053	0.02508894	0.233192511	0.150690133	0.014839377
P35790	-0.110461553	0.031428758	-0.004763116	0.894549298	-0.078381167	0.286219569	-0.245527795	0.014887634
Q96CB9	0.121647749	0.022520802	0.046074421	0.297727009	0.072133099	0.049803501	-0.031335736	0.014902261
Q13547	0.046526289	0.233834281	0.114590437	0.194816437	0.053861304	0.338404976	-0.182935059	0.014910955
Q8N3C0	-0.063503785	0.002044361	-0.032073423	0.268032447	0.054644568	0.311668129	-0.121049145	0.014916703
Q6PJ69	0.039748519	0.613357439	-0.068365919	0.009337528	-0.15408649	0.132892966	-0.235253672	0.014939646
O00299	0.003350353	0.888038396	-0.055337725	0.007210895	0.029146175	0.587102772	0.067369421	0.015006605
Q99729	-0.033761943	0.47652355	-0.000240726	0.995353869	0.099098576	0.066589314	0.209048001	0.01505411
Q9HC21	-0.056109254	0.412170467	0.072072963	0.596216727	0.050668673	0.700801461	0.297385713	0.015166552
Q92626	0.393443469	0.003114454	0.114110859	0.414500525	-0.239330002	0.177880686	-0.526171961	0.01518442
P82909	-0.007744065	0.9086039	-0.021078439	0.648774115	0.032967712	0.657257444	0.173157222	0.015199637
O75865	-0.012825745	0.930525613	-0.21035151	0.171473153	0.025419732	0.36199827	-0.393037935	0.01522177
Q16877	0.211070663	0.20743439	0.088749612	0.532716399	0.033854536	0.917056361	0.476914814	0.015254835
Q6L8Q7	0.021252089	0.638200622	0.012143078	0.829284423	0.063717974	0.026259768	0.127208365	0.015256994
Q16777	0.210222753	0.038103878	0.134264175	0.055086047	0.15602944	0.003201903	-0.409860896	0.015295262
P37198	0.016358904	0.471505404	-0.006382955	0.837976667	0.017365641	0.738311681	0.08929645	0.015302629
O75828	-0.032315011	0.685700961	-0.047515259	0.341899722	0.016477556	0.880516779	0.294432574	0.01538558
Q2PPJ7	0.135397031	0.232101776	0.251761839	0.37434844	-0.216126183	0.184985709	-0.508068882	0.015390896
O94760	-0.035959843	0.1686918	-0.0720859	0.043091126	0.047747678	0.070779811	-0.08017366	0.015391951
O94925	-0.031327584	0.589651999	-0.008914793	0.82189094	0.058407283	0.205434139	-0.079150104	0.015403102
P52292	-0.190936679	0.073761117	0.037519233	0.617701256	-0.004848545	0.868537548	-0.371332319	0.015494753
P45877	-0.022001299	0.598597258	0.105551737	0.311080128	0.0531366	0.531854604	0.196273065	0.01551626
P02533	-0.020846956	0.664732718	0.08586181	0.165648623	-0.017340437	0.857567233	0.226518454	0.015553757
Q13310	-0.040134263	0.106862676	0.009112702	0.785268456	0.005854375	0.861353599	0.210823448	0.015566351
P49411	-0.007885464	0.491412304	-8.08247E-05	0.996080244	0.052559109	0.027220787	0.086654371	0.015569644
Q8IU85	-0.175000422	0.250283029	0.671247389	0.010122573	-0.071782246	0.562290647	0.319449709	0.015569782
O75718	0.028864081	0.721399942	0.18487589	0.028756284	0.109401105	0.017869846	0.202928845	0.015667182
Q96RQ1	0.035691516	0.271500588	-0.072694386	0.264275929	0.046963682	0.443661368	0.125712782	0.015670948
Q86WR0	-0.002850985	0.883176491	0.001144074	0.982997424	0.033807501	0.273228436	-0.054532965	0.015700812
P04049	-0.054742699	0.366343802	-0.118909614	0.13133234	0.093546349	0.258684934	-0.267595853	0.015775413
P12004	-0.100301081	0.112047172	0.050864349	0.223607926	0.046051805	0.075182101	-0.170334502	0.0158128
O43464	-0.015380211	0.664183107	0.054108361	0.518957375	0.029357109	0.536994643	0.078709437	0.015815872
Q9Y3A6	0.040233655	0.587094858	0.04019151	0.655751356	0.19237438	0.031230469	-0.37044032	0.015862764
Q16539	0.068488419	0.105781403	0.049936793	0.212892081	0.072679308	0.325500336	-0.146292038	0.015870424
O15258	0.023230097	0.415276709	-0.051105521	0.115135523	0.1345545	0.021270207	0.088148535	0.015943792
Q9H2K8	-0.008747268	0.923751654	0.010962339	0.791769127	0.048573569	0.437634973	0.260278581	0.015956867
Q9Y6I3	-0.025470987	0.669773293	0.025456512	0.365402301	0.08353377	0.106713286	-0.090666896	0.016035772
P46100	-0.040209439	0.102160358	0.154350998	0.042482317	0.019199814	0.716729447	-0.132548482	0.016062309
O43708	-0.008214141	0.862928355	0.006902609	0.89276627	0.147399183	0.046297895	0.096427264	0.016067141
P63000	0.015417755	0.73182376	-0.074083157	0.118277264	0.059422757	0.330275668	0.216959675	0.016164242
Q13885	0.08900117	0.062401883	-0.076430217	0.487824354	0.138592519	0.230033898	0.209055849	0.016174861
Q9P2K3	0.132733708	0.162801817	0.072845096	0.427623629	0.075865765	0.379853764	0.391163736	0.016181941
P31943	0.013785704	0.712299661	0.017188292	0.721332984	0.070284217	0.14398545	0.114590887	0.01619972
Q3SX09	0.027528376	0.869325208	0.353168217	0.005666129	-0.044788642	0.370441987	0.340895966	0.016213562
O60749	-0.033474051	0.043690399	-0.002501467	0.914075093	0.056118635	0.000430532	-0.06136797	0.016299429
Q15637	-0.006623243	0.916684355	0.017244982	0.724593014	0.038170227	0.511118269	0.13178277	0.016317429
P49247	-0.024512254	0.613677624	0.007508812	0.8586719	0.134517109	0.013595077	0.147168241	0.016326265
P19367	0.004808585	0.976864022	0.084358279	0.794504412	0.238978346	0.507915179	0.862165619	0.01641392
Q9NUU6	-0.004905834	0.800608559	0.072096473	0.128097644	-0.052459089	0.642828796	0.232629955	0.01643978
O75177	-0.004803462	0.876882403	-0.003837413	0.936678823	0.098476891	0.022633002	0.189341535	0.016469514
P13929	0.108046088	0.049409037	0.117425157	0.019789228	0.000874758	0.991308646	-0.05898619	0.016567075
O14732	-0.026268171	0.699283437	-0.002633017	0.95853062	0.077157932	0.221766068	-0.210327519	0.016568828
O43252	0.126508135	0.341220951	0.099293061	0.564477138	0.195941533	0.02219084	0.482978218	0.016572484
P29350	0.018766793	0.650144919	-0.08073936	0.308150709	0.04647386	0.369313368	-0.069243877	0.016590012
Q96BJ3	0.024706105	0.741791257	0.045539281	0.334643503	0.079532254	0.096455229	-0.255367703	0.016684663
Q3T052	0.009223604	0.906008265	0.419380635	0.021054085	0.048081723	0.568145095	0.305452109	0.016693208
P07737	-0.007697105	0.802016998	0.080055382	0.166662343	0.044060043	0.418377629	0.129970165	0.016713909
P12763	-0.126169412	0.120545038	0.378181369	0.000262954	-0.033905217	0.579614172	0.281872217	0.016720767
P51148	-0.027400379	0.420987109	-0.010115084	0.85438034	0.05416467	0.152003241	0.066346062	0.016763305
P11908	-0.020177882	0.264717375	0.118704643	0.024721998	0.037727847	0.447426882	-0.186454302	0.016820417
O60884	-0.016014834	0.713365441	0.021709675	0.65851551	0.057927545	0.168902118	0.104972289	0.016857565
P26885	0.000641748	0.989832484	-0.083587946	0.41957288	0.069623822	0.435126156	-0.202405986	0.016884436
Q8TAQ2	-0.012173	0.842142995	-0.001547135	0.978864472	0.077479666	0.426960572	-0.270108632	0.016923053
P23141	0.003717265	0.964737518	-0.01234658	0.809126267	0.013170337	0.793638934	-0.342974189	0.016933419
Q13547	-0.032570046	0.59576789	-0.026013321	0.585736857	0.085588583	0.04381491	0.144070675	0.016939062
Q9H4L7	-0.350702136	0.121240928	0.10808542	0.690564362	-0.372280464	0.116888942	-0.344090092	0.016966187
Q16658	0.029009845	0.514038492	0.197596687	0.013509416	-0.003691237	0.780162427	0.086795043	0.017001116
P60520	-0.018529524	0.812342037	-0.102154038	0.098815648	0.013485527	0.853518436	0.252978758	0.017040927
Q14527	0.004226827	0.7870253	0.145263704	0.128351742	0.093670963	0.349697011	-0.230272983	0.017100163
P50583	-0.051481911	0.300137191	0.018409473	0.785873698	-0.115057505	0.279916679	-0.241634502	0.017122856
P54819	-0.011529882	0.400437338	0.047977903	0.02779608	0.033706871	0.117215155	0.093237572	0.017161319
Q9P287	-0.1275671	0.052293571	0.023327708	0.703686082	0.108544683	0.062569488	0.203037947	0.017168716
P61024	-0.137303756	0.076893966	0.02713127	0.738820574	-0.004882057	0.925272272	-0.175251732	0.017173372
P47712	0.008358407	0.863825348	0.375805176	0.000215623	0.10368805	0.461474704	0.532240567	0.017223082
Q8TE77	-0.096399549	0.341793985	-0.016332478	0.537495219	-0.043238976	0.453219859	-0.253537683	0.017240593
Q9NZM1	0.014981522	0.318492058	0.053895406	0.057545899	0.040429756	0.131907839	0.177475245	0.017247699
Q15257	0.052023364	0.166128154	0.028942433	0.201837281	0.076554248	0.003827706	-0.108512291	0.017270508
P08263	-0.059510832	0.342963937	-0.070585294	0.383698528	0.074772234	0.605017764	-0.242309984	0.017284928
Q96EY4	-0.019520828	0.770559587	0.189139453	0.037898476	-0.02711293	0.782518711	-0.262865915	0.017289728
P29317	-0.061275848	0.462878052	-0.034199299	0.712772799	0.064328041	0.608042961	0.255889953	0.017317023
P54709	0.017907914	0.608659505	0.021873314	0.367654746	0.030840441	0.433797892	0.152864681	0.017360755
P17931	-0.034088736	0.691799918	0.073290275	0.55329956	-0.005278828	0.934722642	0.235359702	0.017364546
P19367	-0.066985802	0.110633589	0.389286521	0.000906707	-0.05159917	0.04950056	0.050470263	0.017375903
P30519	-0.044748929	0.035648068	-0.010128403	0.416070981	0.03938084	0.381651801	0.062217848	0.017381412
P04075	0.119558643	0.18364358	0.085438482	0.173598452	0.098359957	0.297472092	0.171465462	0.017425517
P33991	-0.099308815	0.110369412	0.002920571	0.955872035	0.028200909	0.408204946	-0.057486003	0.017469588
Q14126	0.04854856	0.407873352	0.030427469	0.468482165	0.036166518	0.683753806	0.204028005	0.017476239
P31150	0.032203433	0.182714347	-0.002179686	0.926495953	0.085659831	0.044627208	-0.031725671	0.017479156
Q01650	-0.105469263	0.214825572	0.448618255	0.001101701	0.055963467	0.542059129	0.201018679	0.017504695
P20674	-0.039313076	0.475260198	-0.112544345	0.012723852	-0.032956121	0.593172872	-0.208199648	0.017511747
Q14573	0.020895563	0.487717123	-0.00307834	0.899501976	0.050504727	0.010926879	0.140739788	0.017545549
Q15800	0.168911473	0.097192813	0.111699999	0.313020291	0.105941616	0.378785588	-0.222289082	0.017650649
P09669	-0.003705566	0.941551241	0.044984403	0.453592011	0.099162707	0.15017864	0.180779266	0.017733465
Q8IYI6	0.021275129	0.105360852	-0.024975603	0.139590004	0.053890016	0.303462341	0.214145481	0.017738766
Q8N5B7	-0.01303875	0.941223196	-0.02411006	0.847442156	0.185334435	0.280468917	0.250815396	0.017754041
Q6UXN9	-0.068336181	0.132590089	-0.00532542	0.832396609	0.048603364	0.214414903	0.168708553	0.017778607
P35241	0.028213628	0.356366668	0.093491253	0.165904027	0.062859437	0.244206244	0.118579292	0.017812713
P63279	-0.011282041	0.61696445	0.003012296	0.940234161	0.099825563	0.018288171	0.146299673	0.017912746
Q8IZP9	-0.096404269	0.414923014	-0.125120192	0.011476067	-0.12909581	0.536932794	-1.377387354	0.017946802
Q14103	-0.00564827	0.756441636	0.038732044	0.376888309	0.07454363	0.024929972	0.142498474	0.018000483
Q8WUH1	-0.049471374	0.679417658	-0.148181308	0.411498148	-0.284447436	0.158884772	-0.720757628	0.018050912
Q8IXM3	-0.037752155	0.328916218	0.017474415	0.579935047	0.005049937	0.935174214	0.110065148	0.018106391
Q9NZN8	0.02409182	0.449046828	-0.060774174	0.112311487	0.109485309	0.033190638	-0.109540799	0.018124248
P54619	-0.001817591	0.946232279	-0.049047927	0.072844963	0.06977362	0.287942372	-0.109094129	0.018150298
Q13242	-0.010871857	0.866122223	-0.036595522	0.177272463	0.139526528	0.035458458	0.291629185	0.018175951
P55899	-0.016391527	0.733771859	-0.065607123	0.368227099	-0.006399405	0.951039379	-0.224955843	0.018180105
Q96M27	0.021461756	0.249375686	-0.007326214	0.902423302	0.041007411	0.54345618	0.06106023	0.018277924
Q15293	0.12623297	0.045786897	0.212783424	0.00791292	0.073511764	0.221764446	-0.092050743	0.018302443
Q9Y2Q0	0.000631476	0.973816097	-0.016604118	0.75309224	-0.012733209	0.699687448	-0.155817457	0.018314248
Q9NVI1	-0.097037746	0.181017167	0.130575704	0.186546549	0.048680305	0.668713231	-0.186576073	0.018422949
Q9HCK8	-0.141844072	0.273554509	0.158099204	0.181283574	-0.261480884	0.108064	-0.622233804	0.018441499
P19367	0.125992549	0.435172425	0.208909815	0.325401513	0.106170483	0.591034728	0.405390311	0.018469771
Q9Y6B6	0.013264999	0.360751187	-0.007350233	0.743679702	0.074594807	0.301296442	-0.179365124	0.018506058
Q9BR61	0.032941739	0.493871802	0.027904562	0.704355349	0.037870791	0.665933143	0.342560274	0.018536083
P31943	0.087328357	0.117526216	-0.084262086	0.31364136	0.071696855	0.189178814	0.143801867	0.018558538
O15270	-0.012045657	0.711326357	-0.124063387	0.118096783	0.190115852	0.017966626	0.207567384	0.018565378
P51649	-0.036638678	0.240453012	-0.015927922	0.777778366	0.00141748	0.969217119	0.207712454	0.018617882
P52564	-0.047692165	0.756791251	0.141094543	0.349496434	-0.188187922	0.330730291	-0.765065854	0.018634306
P84098	-0.035646246	0.128145136	-0.051617642	0.053440637	0.082023401	0.095732046	-0.159853475	0.018671798
P11279	-0.04105639	0.394968444	0.043813479	0.168121415	0.103685191	0.125059922	-0.148749484	0.018680337
Q9BXS5	0.069330897	0.167794804	-0.031634878	0.560495796	0.09000436	0.124892802	0.107706521	0.018683394
Q96IZ0	0.019376285	0.710132132	0.093097076	0.025266483	0.034238863	0.319983572	-0.116580714	0.018695943
O75347	-0.010868404	0.547308319	0.092232535	0.023845832	-0.001884694	0.923025925	-0.138091781	0.01871136
Q9UHI7	-0.060464376	0.162486896	0.006291297	0.957102769	0.084786879	0.482637842	-0.170686588	0.018732098
Q9NQW6	0.063201295	0.306525792	0.042933476	0.468764657	0.099588436	0.200526101	-0.325677072	0.018820801
P02533	0.266193022	0.011003036	0.74094674	0.002459473	0.136231789	0.536796107	-0.274009291	0.018822157
P40939	0.013323005	0.289888209	-0.011182852	0.661004479	0.041457927	0.171464791	0.073518947	0.018867643
Q9NVM6	0.016464903	0.794832101	-0.015517047	0.829978305	0.113058626	0.232305307	0.16866774	0.018924401
P19440	0.02292581	0.429451638	0.022668692	0.388972156	0.037248291	0.578881859	0.174956777	0.018957386
P46013	-0.119489654	0.075855877	0.080542141	0.273474652	0.006461695	0.9158392	-0.310946633	0.018977363
O00629	-0.068999216	0.334962941	-0.063277303	0.317019916	0.080462432	0.106381979	0.103982353	0.018977899
Q13144	0.01092569	0.787274495	-0.074014833	0.00351033	-0.041359235	0.384811231	-0.113378558	0.018987931
P54652	-0.072780459	0.141383006	0.100720321	0.451997374	0.024115628	0.692103722	0.266416022	0.018994649
Q9UID3	0.000572422	0.988644643	-0.029661478	0.509837673	-0.000428343	0.994221291	-0.193492727	0.019014784
Q9H4Z3	0.214037992	0.07243474	0.04660027	0.817329055	0.035560447	0.724182046	0.331628373	0.019027051
P08727	-0.002740452	0.873668349	-0.025517826	0.413385648	0.028719411	0.330366642	0.134861222	0.019087275
B7ZBB8	0.133864103	0.242794616	0.112152856	0.166224829	0.007906545	0.944061787	-0.17174099	0.019091769
Q08623	0.028919534	0.195743908	-0.031785213	0.075795312	0.065549325	0.018140696	-0.12584425	0.01909235
O00410	-0.023164067	0.446185107	0.018246964	0.517186779	0.075050266	0.068753233	0.106523075	0.01915652
O60306	-0.092723971	0.293728067	0.008238583	0.890600529	-0.04108257	0.662888367	-0.200337216	0.019160768
Q14116	-0.000780984	0.971774983	-0.063321589	0.180157789	0.048333984	0.055801409	-0.118834179	0.01919183
Q9NX63	-0.033356527	0.078598618	-0.022614618	0.281985625	0.070414236	0.049954145	0.094141546	0.019227436
Q9UNH6	-0.123980563	0.032570474	-0.006541331	0.918312541	-0.037799391	0.578769109	-0.120036295	0.01928086
Q9BVA1	0.067161326	0.341378103	-0.045122809	0.698688007	0.180402008	0.368995614	0.317769704	0.019315002
Q9NZW5	-0.087288165	0.00268211	-0.067783313	0.165447398	0.053647467	0.498830062	0.083805907	0.019318425
Q8TEQ6	0.00877074	0.74767128	0.059367431	0.139147645	0.064150125	0.279488959	0.145206706	0.019363258
Q969T9	0.066640512	0.463084281	0.066780957	0.070127957	-0.00979567	0.923479683	-0.353892655	0.019398461
Q96C23	0.013931387	0.80866855	-0.033065819	0.600925244	0.067928997	0.003671549	-0.12912029	0.019399632
P51580	-0.007595072	0.845280473	-0.004267644	0.875516037	0.032540043	0.452962472	-0.096038676	0.019471897
P06280	-0.002996128	0.936656241	-0.001401815	0.977963422	0.051334185	0.538616041	-0.148750335	0.019544008
P02533	-0.191609811	0.178958744	-0.178924093	0.205069403	-0.105421911	0.646928702	1.616485762	0.019578081
Q9Y4G6	-0.04513554	0.230527713	0.280102741	0.001342968	0.011907683	0.396378213	-0.129156097	0.019619776
Q9NP92	0.082095829	0.101259771	0.054317552	0.558695222	0.026458648	0.582367738	-0.253881722	0.019630266
P02533	0.062226197	0.640604485	1.123089278	0.006580158	0.037536329	0.802239106	0.5560142	0.01964011
Q7KZI7	-0.032453981	0.290877699	-0.057597751	0.220964758	-0.004668361	0.940868617	-0.101266935	0.019652639
Q96C86	0.032530003	0.087715456	-0.01431111	0.84529793	0.083555629	0.195675235	0.149123047	0.019686192
P05387	-0.002865281	0.815282104	0.062110648	0.005521808	0.031123003	0.323433922	0.142038846	0.019724365
Q15714	-0.13303615	0.544344013	-0.406548463	0.312183318	-0.047390366	0.576561972	-0.282684563	0.019729247
A9UHW6	0.06775075	0.636337518	0.149422127	0.299596284	-0.08660374	0.493660027	-0.186907022	0.01985207
Q9HD33	-0.045025337	0.208662053	-0.037679339	0.319783191	0.022550589	0.696745157	0.103639349	0.019875551
Q5TFE4	-0.003998499	0.921406995	0.022451949	0.664154979	0.062412911	0.051787656	0.195892903	0.019907837
Q86TX2	0.009328344	0.832923645	0.012769376	0.782824172	-0.012096152	0.844581834	-0.073293574	0.019930216
P00491	0.025780541	0.570437955	0.013079728	0.490622161	0.056738747	0.053914402	-0.08672631	0.020074713
P17987	-0.018432483	0.114948687	0.016049036	0.422389107	0.014375477	0.52984318	0.088686789	0.020075913
P52895	0.002131555	0.954141953	0.019263478	0.684402307	0.070497048	0.390969692	-0.050761262	0.020126329
Q92610	-0.045838349	0.419929196	-0.066814895	0.153577332	0.131093204	0.134833918	0.470436375	0.020133191
P40227	-0.034499669	0.208705508	0.005584563	0.74509409	0.042016005	0.023887621	0.068663812	0.020195779
Q15942	-0.042351981	0.257580328	0.025872679	0.720019887	0.065883262	0.034157055	0.152968447	0.020212456
P62873	0.058362116	0.37451107	-0.002809207	0.986873168	0.050291045	0.356548336	0.263347256	0.020223169
Q8N1A6	0.076380932	0.272418124	-0.059185626	0.349817591	0.084930136	0.316183575	-0.074047853	0.020226117
Q5JSZ5	0.120093229	0.470900735	0.02694776	0.851801623	0.222212613	0.225597717	-0.577011388	0.02026071
Q9Y624	-0.007186386	0.851079116	-0.092830833	0.025164537	-0.027729443	0.426609947	-0.12773046	0.02026718
Q9Y3T9	-0.053279917	0.380636216	0.0490385	0.23657267	0.033791335	0.314899513	0.119199374	0.02028294
Q9NRX5	0.18620386	0.496549905	-0.073919765	0.568778545	-0.261834713	0.298401759	-0.614917605	0.020296771
Q16819	-0.02112808	0.678080381	0.032793576	0.6636663	-0.1289059	0.493244206	-0.469500804	0.02041038
O15235	-0.068561011	0.484722572	0.013514043	0.910357786	0.052689032	0.570599739	0.369541151	0.020441734
P47755	-0.014682839	0.657720625	0.01595661	0.256570363	0.018855135	0.472963581	0.074853686	0.020445569
Q16625	-0.046249612	0.516380157	-0.030988391	0.592081917	0.032972602	0.476566849	0.145613519	0.020448278
P50579	-0.103636687	0.153007895	-0.072903315	0.381167703	0.065819838	0.573023763	-0.104102005	0.020478041
Q7Z7F7	-0.091348596	0.073858257	-0.118903324	0.066263752	0.002944788	0.981062002	-0.122937948	0.02052236
O15397	-0.176530633	0.08544241	0.167744546	0.010307486	0.086576386	0.186482833	-0.229762446	0.020547783
Q15121	0.201700855	0.003969193	-0.004911105	0.945248048	0.021115835	0.735531815	-0.25197419	0.02057173
Q06520	-0.044415499	0.518491547	0.001653073	0.980856985	0.120566267	0.484363163	-0.384429466	0.020575335
Q9P0S2	-0.028997283	0.725424698	0.097890236	0.479832747	-0.126963354	0.400896035	-0.420023349	0.020767722
Q00839	-0.029620506	0.29346857	0.017278521	0.425404127	0.052036978	0.042969265	0.134291624	0.020806728
Q16186	-0.186611593	0.004859574	-0.050461635	0.460042893	0.01103179	0.623488059	0.169582048	0.02081471
Q12802	0.015545286	0.73445839	0.038028092	0.120710828	0.013577175	0.737339859	-0.213021944	0.02084253
P51858	-0.018348491	0.626298988	0.019629788	0.444320326	0.01010304	0.657694797	0.101799601	0.020851117
O75962	0.137451683	0.374543557	0.093760098	0.467520797	-0.011458694	0.929456885	0.47918753	0.02088954
P08134	0.038779906	0.188389695	-0.004062511	0.931487144	0.021950968	0.641063776	0.209205041	0.020951143
Q9Y6G5	-0.035676332	0.646273265	0.002593644	0.968206961	0.008210856	0.95647504	-0.247373388	0.020975535
Q9UNM6	-0.026290286	0.400324677	0.002111861	0.963011072	0.031845098	0.280617387	0.11425617	0.021067326
P57088	-0.02434807	0.337242506	-0.060209227	0.005558089	0.032820194	0.366092187	-0.019213629	0.021112869
Q9BSV6	0.023111029	0.73833721	-0.007586134	0.923019356	0.086458405	0.120901032	-0.1602431	0.021134736
P42285	-0.011534882	0.497639403	0.006015559	0.870789977	0.040433516	0.489025542	0.039322451	0.021185127
Q7L9L4	-0.037931932	0.124552079	0.015065442	0.576390959	0.063093887	0.067225935	-0.170389074	0.021316733
Q9H832	0.050402707	0.2142165	0.027841391	0.306184063	0.076739354	0.027984087	-0.069251106	0.021483307
Q9H479	-0.01280626	0.654923882	-0.00874835	0.703456236	0.007216855	0.704270109	-0.09288443	0.02149273
P46776	-0.039050103	0.156162612	0.072167116	0.165747412	0.061395973	0.018295028	-0.14330849	0.02159351
Q9NVH0	0.033710957	0.705361978	-0.009090955	0.80074686	0.088969769	0.057487074	0.230927525	0.021616645
Q96IU4	0.006425977	0.816065277	-0.045224604	0.354686104	0.046013507	0.228586097	-0.125882256	0.02163499
P12955	-0.091988882	0.010079428	0.016682082	0.52263923	0.010856514	0.825859923	-0.125321714	0.021672725
Q9Y3R5	0.054296433	0.545043184	-0.093339006	0.128345288	0.111567831	0.082183743	0.232924091	0.021716325
Q9BRG1	0.001252702	0.98140089	-0.092625189	0.001913649	0.044184615	0.271507807	-0.137930174	0.021724618
Q3ZBS7	0.051401473	0.645113589	0.273588086	0.004146031	-0.03348958	0.713281958	0.334471681	0.021785632
Q9Y2S2	0.106499222	0.114623015	-0.026899624	0.344121958	0.051394959	0.287063092	-0.094170314	0.021813461
Q8TD22	-0.041990642	0.648281357	-0.012259658	0.910091333	-0.073523236	0.264718623	-0.21024421	0.021837471
P60174	0.03442047	0.638543492	0.053906688	0.317555108	0.034807472	0.742810244	0.209317875	0.021871651
Q6ZS30	-0.112910493	0.221066172	0.035394405	0.646769642	-0.053978358	0.54638034	-0.17025453	0.021927858
P18077	-0.082344217	0.147691986	0.039315874	0.399969736	0.070509392	0.053741822	0.13115956	0.022052745
Q9H2G2	0.068893666	0.185503143	-0.023183641	0.776775281	0.068324518	0.444213176	0.189512248	0.022070853
P52434	0.010797667	0.812135013	0.11795197	0.052893806	0.009037778	0.848562262	-0.095440176	0.022103183
Q5T8P6	0.079961179	0.127004933	-0.012208572	0.842093726	0.041626584	0.329266257	0.19948808	0.022114305
P51991	-0.047000027	0.241509176	-0.115976353	0.04036814	0.071824003	0.052822883	0.174043187	0.022124314
P35221	-0.027710679	0.421320675	-0.078974309	0.038844123	0.027500055	0.349657843	-0.166256085	0.022209066
Q13724	-0.013975874	0.732172392	-0.009600957	0.794889362	0.074282438	0.116017966	0.118279529	0.022256833
Q9NPI6	0.02944495	0.599715523	0.030078795	0.529414593	0.077772704	0.337099881	0.110950833	0.022295006
Q02978	-0.003517091	0.886405968	0.019019218	0.708185599	0.067093363	0.25747737	-0.082649493	0.022371901
Q5RKV6	-0.049042256	0.037844893	0.080203553	0.054877816	0.04590207	0.101341139	-0.114062813	0.022426632
P12429	0.030850784	0.323830088	-0.017815942	0.484202632	0.043134709	0.534423669	0.096682521	0.02247047
Q9NX20	-0.053903335	0.516536889	-0.060381564	0.404096033	0.080710388	0.224187083	0.208688968	0.022500876
Q8N3V7	0.106193324	0.370594159	0.15033837	0.100701218	0.094832956	0.038972039	-0.366256822	0.022536844
P22059	0.018441013	0.277435518	-0.013496757	0.237308582	0.039474795	0.010486183	-0.093528074	0.0225776
P18858	-0.158387441	0.063080627	-0.084107923	0.190171603	0.006633855	0.884341532	-0.313866502	0.022597813
O43143	-0.021450123	0.473319937	0.008043647	0.773258997	0.027087979	0.047489006	0.063416483	0.022739917
Q07812	0.032405355	0.378219656	0.003712902	0.945676633	0.053479019	0.18410989	-0.193711764	0.022784196
Q00341	0.002049031	0.900306052	0.005137854	0.800945296	0.033285266	0.142066176	-0.118540988	0.022980657
Q7KZ85	-0.037847956	0.108462182	0.005752682	0.875694717	0.000222524	0.994855018	-0.092463673	0.022995268
P28290	0.019703471	0.700661837	0.017608541	0.564534358	0.061828479	0.37246398	0.128583019	0.023158611
Q15363	0.030392772	0.447541607	0.001391331	0.98354892	0.084509964	0.025334491	0.181459795	0.02328079
Q13751	0.146971079	0.039755104	0.025208801	0.474265109	-0.00894204	0.861064217	0.449031872	0.023296318
P41235	-0.121632259	0.036274014	-0.032755604	0.454757085	-0.075200901	0.105999498	-0.396943884	0.023312821
P13929	0.040206675	0.090197671	0.08875278	0.157115281	0.035766384	0.676908876	0.22485553	0.023405797
Q9NZ01	-0.070993939	0.011870213	0.017967995	0.618729903	0.048709248	0.098274181	0.074964367	0.023490879
P55809	-0.026089318	0.60308094	0.34071625	0.00194799	-0.031808396	0.599079314	0.201977278	0.023534542
B2RUZ4	0.092606892	0.306727906	0.071680823	0.5931506	-0.121354141	0.162833441	-0.175259059	0.023582813
Q9H299	0.066491539	0.064943448	-0.023891623	0.590679548	0.033718507	0.687349395	-0.132415214	0.023583202
Q96QK1	0.021423772	0.085057726	-0.016988043	0.325035254	0.083216018	0.025755836	-0.06094073	0.023691247
Q6UWP7	0.025952314	0.825490709	-0.005761079	0.969895504	0.074219787	0.60771051	0.497495342	0.023724486
Q9NZJ9	-0.046549471	0.094485804	-0.07375136	0.040150126	0.019723236	0.607162361	-0.123045581	0.023745299
P25786	-0.007108923	0.777739275	0.027044228	0.095505088	0.037375969	0.026018205	0.057546062	0.023752503
P36507	-0.005825077	0.681486576	-0.047363017	0.180157008	0.037667932	0.345198483	-0.141666514	0.023755001
P52926	0.003957477	0.96448198	0.097799934	0.413905435	0.235683585	0.098216819	0.256959483	0.023758866
Q13356	-0.043159078	0.425912696	-0.072707203	0.216145085	-0.020576429	0.831044604	-0.268635874	0.023765994
Q6ZVM7	0.01268128	0.736760021	-0.003477458	0.928295472	0.016684254	0.838607691	0.107908321	0.023826753
Q7Z7K6	0.101395244	0.203006442	0.073964801	0.40365612	-0.065323675	0.516715269	0.333012671	0.023873881
Q96EN8	0.151178342	0.256353493	0.022078138	0.897610802	0.230106487	0.099728015	-0.380669067	0.023946378
Q9Y2D4	-0.116411612	0.3982955	0.014046003	0.886542392	0.027743891	0.662259143	0.164742147	0.02394852
Q9BXP5	0.005765737	0.832693568	0.071740032	0.010801419	0.052641208	0.066390401	0.042801986	0.023964492
O94874	0.016594916	0.24272754	0.00718207	0.794980081	0.023897761	0.249655992	0.132395437	0.02396566
Q9Y3A4	-0.049660549	0.189928638	0.059177076	0.24871773	0.030833604	0.431788849	-0.161806112	0.023999655
Q9Y6E2	-0.142398182	0.04482246	-0.044348787	0.133873311	-0.018149589	0.666714259	0.143516693	0.024031065
Q6Y1H2	-0.000406789	0.994608846	-0.048250725	0.307053801	0.024357843	0.448848852	0.11037985	0.024062909
Q7L2J0	-0.000381553	0.994004404	-0.00223329	0.964379747	-0.003472357	0.958443625	0.167230185	0.024141881
Q9UKR5	0.034372056	0.790485922	0.106853873	0.282364794	0.026784684	0.764008787	0.224176014	0.024192266
P16435	0.001188764	0.922490712	-0.026286968	0.263539199	0.055511721	0.047097777	0.173256392	0.024263115
Q9H2K0	0.092715078	0.0499175	-0.058007146	0.090444493	0.045458125	0.396969223	0.146020815	0.024288777
P51812	-0.045885401	0.074182539	-0.008197128	0.560303239	0.031334165	0.249899699	-0.145484159	0.024305565
O14841	0.00856928	0.886692508	0.001218569	0.983141929	-0.021809203	0.718388384	-0.192975091	0.024307208
Q2HJF0	0.117765687	0.417212766	0.946735043	0.054351965	0.192304212	0.226038165	0.625761877	0.024319093
P07148	-0.002502673	0.943081451	-0.098675066	0.008911965	0.042144764	0.38850431	-0.108066917	0.024350971
Q9BS26	0.016842216	0.144528998	-0.016167679	0.489771774	0.04122796	0.012914805	0.130601128	0.024353831
O43657	0.011946168	0.841013519	0.036017792	0.443465185	0.115142384	0.120342569	-0.255145707	0.024456435
Q9HC35	-0.001261207	0.967612319	-0.033226794	0.296741584	0.044396325	0.205445698	0.061088936	0.024489964
Q9UMX0	-0.151606438	0.117435012	0.025066391	0.822703295	0.069557911	0.505554855	-0.365543428	0.024520426
Q7Z4G1	-0.237553392	0.086821904	0.211637361	0.163581114	-0.261211312	0.023612244	0.573939581	0.024543602
Q8WVM7	-0.230195586	0.029672975	0.060603081	0.073104034	0.472456943	0.122955013	2.772623038	0.024689232
P62760	0.068556589	0.431095314	0.033286782	0.709331486	-0.062868591	0.533682012	-0.2280171	0.024788363
P37802	0.00912452	0.688154424	0.212068483	0.002412277	0.077900314	0.005324256	0.101735373	0.024866005
Q7Z7M9	0.025114735	0.806952588	0.015242949	0.90598946	0.010980107	0.936613008	0.265682144	0.024923204
P54920	-0.001034477	0.967277627	0.014717713	0.563697709	0.017092722	0.558999114	-0.093236196	0.024941722
Q9UPN7	0.006668218	0.902976956	-0.023905803	0.63667774	0.264588782	0.001895988	1.28904943	0.024946218
Q99829	0.036103512	0.200183583	0.054350026	0.089011644	0.068605903	0.001158313	-0.086996812	0.024980338
Q9Y3U8	-0.018865125	0.632948649	0.023014529	0.366968542	0.051201056	0.166703496	0.121088547	0.024988437
Q14181	-0.131941904	0.238220202	0.305205995	0.13334379	0.058977688	0.573644242	-0.254462881	0.025061648
Q7KZF4	-0.052423235	0.007513341	0.021917406	0.334406313	0.020267474	0.255251175	-0.097776435	0.025133083
Q99986	-0.149471879	0.099419784	0.000489326	0.99031304	0.054208724	0.392232865	-0.104164834	0.025245693
Q96MV1	0.161592889	0.136563961	0.007858094	0.824697153	-0.001366834	0.971935503	0.178469491	0.025258085
Q9UDY2	-0.024626527	0.426230375	0.022003275	0.496215764	0.076365421	0.104537358	0.083927997	0.025285013
Q8N6R0	0.010817888	0.868419152	0.009449827	0.927624027	-0.006983856	0.940997971	-0.210852223	0.025312215
Q9P2T1	0.148579006	0.078966328	-0.091100304	0.114279087	0.187600508	0.002225935	0.147408219	0.025433081
Q9GZT6	0.007421294	0.940047455	-0.002858866	0.976668759	0.007671875	0.890441252	0.256796852	0.025446315
Q9NY93	-0.090509129	0.064793504	0.090045395	0.025374611	-0.017787293	0.677031071	-0.129371243	0.0254602
Q9Y285	-0.032164258	0.344384029	0.030180591	0.347316252	0.013330529	0.593886156	0.072613671	0.025464077
Q9Y6E0	0.042335353	0.577412382	0.040923233	0.474956414	0.079194657	0.271717842	0.12154218	0.02548352
Q9H3Z4	-0.012819055	0.657360715	-0.087479361	0.083623501	0.06899843	0.195696987	0.152255511	0.025540086
P22309	0.0267865	0.30415815	-0.06886511	0.079283389	0.003938206	0.859236252	0.022562678	0.025651323
P11717	0.033571793	0.1831657	0.082327472	0.001282384	0.026413125	0.440813704	-0.070670338	0.025763498
P54802	0.029525985	0.179048582	0.053400055	0.385358612	0.027570226	0.739737765	-0.151649864	0.025787222
Q9H552	0.149427147	0.359423131	-0.02672504	0.838575785	0.106404279	0.265030473	-0.39444129	0.025792027
P24844	-0.316690966	0.033752494	0.314413424	0.047268334	-0.354090428	0.025331924	0.263031708	0.025893678
Q96EK6	-0.07716349	0.291263708	0.033235211	0.269132718	0.051287799	0.383204568	0.152802186	0.025923822
P05388	-0.021594246	0.271087119	0.083041772	0.003414587	0.07082481	0.040930491	0.102531289	0.025942399
Q86W50	0.027717389	0.705277719	0.090208681	0.486290854	-0.052751607	0.607505693	-0.253907882	0.025961548
Q15836	-0.093171335	0.049364045	-0.004440531	0.910458073	-0.029940941	0.289737064	0.229708785	0.025963397
Q9Y3P9	-0.022612633	0.474739989	0.041459948	0.313404164	0.006898146	0.853785414	-0.086642986	0.025988448
Q14141	-0.119939704	0.590508635	0.341601614	0.139008411	-0.291727252	0.187750589	0.318650247	0.026065174
P08263	0.093187695	0.507044359	-0.137037185	0.070705436	0.055219227	0.743052648	-0.40720956	0.026082316
O43491	-0.01707738	0.457814473	-0.011847888	0.695639907	0.030320471	0.065368111	0.096458746	0.026286407
Q9HAV7	0.033963763	0.494039454	-0.040676548	0.200191967	0.046209426	0.366898258	0.126922777	0.026300012
Q96AE4	-0.021149056	0.462272546	0.028876889	0.344565874	0.033048658	0.530198239	0.144746505	0.02633077
Q16527	0.179327365	0.056345454	0.327481441	0.005244954	0.122607855	0.161387771	-0.228361146	0.026357379
Q14566	-0.098338685	0.07389226	0.029915654	0.625794339	-0.013126205	0.823772586	-0.100923549	0.026371426
P61513	-0.087661787	0.008994564	-0.013766111	0.774554325	0.063645448	0.166820032	-0.127958828	0.026381078
Q8N3X1	-0.003065695	0.949101707	-0.001345207	0.981404755	0.034365913	0.682643607	0.265179233	0.026455873
P49588	-0.033192072	0.331536474	-0.025964935	0.426090883	0.056463993	0.012046101	-0.135267953	0.026466015
P27635	-0.037485471	0.441584947	0.03142835	0.597331906	0.019784463	0.623470344	-0.162998797	0.026467768
P14314	-0.006821158	0.830336258	0.067969829	0.063747785	0.036854111	0.142181366	0.130474173	0.026480489
O95994	-0.044072981	0.481649801	0.043210065	0.635104273	0.066416477	0.541691996	0.252681776	0.02649202
Q5VU43	0.040279429	0.517627268	-0.078757087	0.379087794	-0.151725448	0.209360183	-0.151154984	0.026540664
P62241	-0.124615236	0.012908781	-0.010596657	0.536708428	-0.002911353	0.813360422	0.105735159	0.026601246
Q15599	-0.168256584	0.218214283	0.664410431	0.089265381	0.020689593	0.844530612	-0.209414588	0.026680862
C9JLW8	-0.026844324	0.684056888	0.085444579	0.397378161	0.071440993	0.538786086	-0.353902426	0.02668114
O14653	-0.084923334	0.091217822	-0.021625598	0.610154489	-0.104631337	0.00710619	0.20083647	0.026748002
Q06323	-0.034626984	0.153278281	-0.012223229	0.581660223	0.033290529	0.317221698	0.112147057	0.026792073
Q9NX24	0.010586695	0.529125017	0.056266536	0.424166516	0.06716437	0.237664043	0.162578121	0.02683916
Q9UK76	0.185460692	0.030264166	0.006307571	0.928868263	-0.003253465	0.9517904	-0.190614897	0.026850134
Q17RY6	-0.354046974	0.016435866	-0.184311659	0.155453177	-0.004781309	0.984016402	1.284333456	0.026872485
P54725	-0.003063974	0.95561928	0.093213999	0.041280521	0.075006179	0.061440883	-0.071613234	0.026891359
Q9ULF5	-0.081288433	0.175842115	0.18912801	0.057358986	-0.008081964	0.897722133	-0.275635499	0.026921388
P61326	-0.087757208	0.00060673	0.064672492	0.051938694	0.067219705	0.156969997	0.068103339	0.026936026
P26640	-0.024326686	0.0951418	0.018659605	0.174868173	0.028607617	0.503132801	0.053633475	0.026941353
Q9NYR9	0.134391823	0.134328916	0.343304354	0.003041001	-0.168333422	0.384565239	-0.563576902	0.026945955
O95295	0.000456122	0.992728701	-0.007803863	0.869714488	-0.000509956	0.989325063	-0.136091222	0.026958153
Q96BI1	0.031954135	0.436569574	-0.017723176	0.732215149	0.011463754	0.889091766	0.167517576	0.026975686
P17690	0.10283027	0.132144277	0.280880831	0.015919031	0.063470133	0.530285984	0.18237175	0.027000189
Q6P1J9	0.010827877	0.772071399	0.084009059	0.127318088	0.065753768	0.15683635	-0.083841116	0.027076365
Q02487	-0.127951618	0.313596145	0.167439318	0.136392357	-0.058722792	0.556425175	0.19799773	0.027148238
O75348	-0.013050843	0.796098903	-0.02431074	0.526331238	-0.028348109	0.431580867	-0.236510968	0.027163172
P60709	0.048903103	0.408931143	0.099925257	0.175878885	0.040221574	0.256528822	0.153604918	0.027191502
Q9H0H5	-0.044018097	0.170264578	0.071397806	0.06414071	0.009418991	0.841961692	-0.282090694	0.027315128
P67936	-0.002238987	0.964082091	0.145802909	0.028026746	0.103127246	0.038831249	0.218080562	0.027317747
Q8IWL3	-0.241698627	0.070760506	-0.093439261	0.355259104	-0.067575215	0.695115381	0.228333263	0.027362037
Q13131	0.090187417	0.140637608	-0.018180157	0.707516913	0.121596347	0.138482091	-0.148300855	0.027383549
P10412	-0.156339346	0.034312005	-0.076240099	0.340585436	0.08359654	0.280500335	-0.32666182	0.027495438
P50416	0.051492799	0.11202281	0.076943396	0.170647747	-0.030855367	0.438409895	0.122522535	0.027520546
Q8NEZ5	-0.050473304	0.598119531	-0.000494635	0.991392228	-0.041612193	0.652928899	-0.14859781	0.027526384
Q7Z2W4	-0.042468222	0.002661189	0.041803275	0.090854011	0.060565557	0.055310704	0.099989838	0.027526622
Q969X1	0.075022207	0.444546194	0.041516184	0.617379081	-0.00309917	0.964007299	0.243890777	0.027527652
Q3LXA3	0.003805985	0.861075374	0.028131369	0.211491357	0.007006814	0.863674468	-0.056437271	0.027530003
Q9Y6A4	-0.11895728	0.19589346	-0.044961199	0.588820099	-0.018565891	0.763333141	-0.147154817	0.02756154
P35908	-0.103194172	0.334029508	-0.385436617	0.151307406	0.078694608	0.607207185	0.397667771	0.027641291
Q9UHY7	0.034286107	0.419759128	-0.026615558	0.358573824	-0.003430671	0.874049313	-0.12306621	0.027714115
Q92673	0.207266093	0.132938547	0.113470308	0.11028171	0.103142873	0.533299362	-0.20532956	0.027769606
P17706	-0.066469356	0.301037278	-0.00988901	0.82994407	0.050392831	0.356558956	0.127517506	0.027784819
Q15084	0.01762703	0.603171273	0.026823414	0.394808843	0.043234962	0.032428952	0.085798079	0.027829947
P14550	-0.014874604	0.280712344	0.002932541	0.905584464	0.022190019	0.503255465	-0.126332299	0.027886583
P38117	-0.022795216	0.532080536	-0.007533041	0.872385943	0.014623113	0.744327494	0.062113051	0.027916955
Q8IWU4	-0.023463147	0.809662984	0.227208104	0.044693638	-0.001202813	0.990975718	-0.305055349	0.027919833
P28074	0.013212677	0.493715076	0.00484923	0.822033457	0.030565382	0.299533215	-0.06499679	0.02792559
Q12824	-0.043245611	0.334178384	0.092288338	0.031365701	0.015136188	0.734604451	0.103625196	0.027995134
Q8IYB8	0.039061416	0.354011844	-0.011495752	0.605705735	0.032447625	0.399586706	0.128494479	0.028010289
Q9BTT6	0.089841522	0.345202644	0.059158807	0.443800101	0.085881207	0.294933388	0.231044255	0.028039751
P50990	-0.024571749	0.007659301	0.002402372	0.827526932	0.044335453	0.098754919	0.083307362	0.028076824
Q8TBF4	-0.031063121	0.768333714	-0.146602095	0.027050232	-0.037970367	0.810540157	-0.145340102	0.028113525
Q8WTV0	0.1224427	0.365004904	0.071213268	0.323984458	0.116520009	0.165909255	0.170171448	0.028220671
Q9BWD1	0.005055393	0.766237318	-0.034805257	0.154510298	0.053019602	0.391798455	0.35753951	0.028237785
O00330	-0.099768428	0.053056805	-0.060396145	0.100662962	0.01533482	0.722516916	0.070362795	0.028283906
P23434	0.003722206	0.956895427	0.023667632	0.719524163	0.03514378	0.405589684	0.0998086	0.028331906
P33121	0.152271173	0.115170995	0.013679392	0.918063701	-0.00188874	0.984396508	-0.098768257	0.028342537
O43617	0.047366154	0.167501442	0.022885322	0.633160062	-0.031623898	0.492543782	-0.200498611	0.02835424
Q15811	-0.005287535	0.942365229	0.042800997	0.701155038	-0.00590853	0.926632671	-0.14152931	0.028360219
P49137	-0.05347072	0.324784649	-0.092775497	0.212784709	0.118929062	0.003767282	0.147736876	0.028373624
Q92797	0.012012577	0.713811802	-0.004942408	0.864783434	0.069560095	0.20480609	-0.102085444	0.028405343
Q9H7B2	-0.07033968	0.110765172	-0.106705956	0.018289407	0.058657156	0.359358744	0.103293144	0.028412205
Q9P0V9	0.033106924	0.331595974	-0.037967457	0.181082596	0.055794553	0.308516081	0.128406907	0.028413223
O95361	0.018979263	0.587409904	0.105085143	0.097155844	0.041798833	0.408967727	0.212206487	0.028447693
Q6YN16	-0.010712895	0.562663968	-0.006114418	0.836124613	0.059617863	0.095886469	0.071230145	0.028452032
P15529	0.045374515	0.705872358	0.164450683	0.058389635	0.067002711	0.31217916	-0.233208845	0.028610569
P15121	-0.069422353	0.012724239	0.340178689	0.003085191	0.039839307	0.330178201	-0.112227651	0.028731215
Q93008	0.015776813	0.348712175	0.017762962	0.305716115	0.030407775	0.271992598	-0.079082774	0.028862361
Q5VUM1	0.097234465	0.580197038	-0.087667969	0.45862778	-0.054184927	0.701166917	-0.573606755	0.02889301
Q7Z4G4	-0.186435586	0.196521483	0.058819296	0.385902942	0.03056664	0.633667945	0.092387518	0.028978648
O14925	-0.149722232	0.130608395	0.09302446	0.378498308	0.070195215	0.515413359	-0.452113744	0.028984232
Q9Y5M8	-0.011059405	0.693646334	0.084174004	0.023480367	0.003943125	0.901052185	0.065118223	0.029035243
Q9BRL6	-0.109872867	0.289672611	0.000408794	0.994616154	0.012605628	0.898832937	0.252605271	0.029046119
O75818	0.087974991	0.102666978	-0.037366268	0.314524575	0.063970745	0.339580058	0.141160992	0.029056951
Q5VWJ9	0.082802111	0.14138466	0.055426453	0.02342144	0.022238399	0.716438249	-0.084635556	0.029058234
Q9NQ50	-0.120877821	0.011474496	-0.004550253	0.899274199	0.009058993	0.789722992	0.249362029	0.029065085
P47985	0.00922261	0.765586609	-0.002076014	0.930281155	0.004580885	0.912616097	0.124149039	0.029081888
Q9NUB1	0.046917481	0.052086687	0.030683831	0.529806715	0.014327956	0.623469322	-0.174544822	0.029100194
Q8TF65	0.036775948	0.465544853	0.037705597	0.583095157	-0.022690655	0.736464045	-0.178671484	0.029301723
Q15149	-0.011994408	0.771072606	0.152077522	6.83442E-05	-0.003297532	0.948363701	0.121434881	0.029375798
Q7Z739	0.016110106	0.767606459	0.006968758	0.836717727	0.073679555	0.122571298	-0.093151499	0.02938439
Q8NFJ5	0.188132962	0.14985142	0.027257536	0.702994832	0.102292181	0.435023757	0.270872476	0.029390884
P40692	0.016932691	0.766974576	0.125456834	0.045277156	0.071888295	0.296169971	-0.191803758	0.029417219
Q8IX04	-0.039203456	0.186958458	0.019240967	0.50176065	0.053891009	0.320982846	-0.100741401	0.029418679
Q13469	-0.03199656	0.42055	-0.025291806	0.638899399	0.005311361	0.917101367	-0.099904815	0.029490082
Q9H7C9	0.06809877	0.261065792	0.02021973	0.657084176	0.033127575	0.700924757	-0.200415338	0.029529717
Q8WUQ7	-0.030418044	0.582447594	0.151691184	0.038741091	-0.091815313	0.216029679	-0.145253154	0.029733289
P82930	-0.011782935	0.690444836	0.086469184	0.084944152	0.083329968	0.153379544	-0.20100023	0.029744754
P01892	-0.021647813	0.456876377	0.116224344	0.008251178	0.018005727	0.72490158	-0.189495539	0.029790355
Q9BWH2	0.014183373	0.702377612	0.163979666	0.093981223	0.039935493	0.614130406	-0.133880068	0.029902765
Q9BU61	-0.0009205	0.99060134	0.121241879	0.092462654	0.025091768	0.503525893	-0.108522021	0.029970738
Q9Y2B0	0.086587798	0.057815402	0.058709661	0.043867049	0.024229049	0.223371782	-0.112650503	0.029991082
Q12906	-0.027169669	0.033915446	-0.0097772	0.670275721	0.050767258	0.193972796	0.099524993	0.030027869
A0AV96	0.017314905	0.747481108	-0.028862143	0.512741471	0.039890225	0.353468984	-0.098496366	0.030091711
P49755	-0.020183385	0.216285285	-0.016281223	0.772487923	0.02703132	0.343733602	0.092738355	0.030101462
Q32MZ4	0.029488711	0.130318564	0.068527056	0.081556841	0.033891719	0.217934435	0.072607897	0.030274036
Q3YEC7	0.009101965	0.871321438	-0.003320464	0.93999829	0.020752081	0.324083108	-0.19904628	0.03029212
Q9UHQ4	0.062094636	0.015046835	0.02556764	0.356390129	0.036201019	0.381036829	0.121839193	0.030317113
P24941	-0.157874763	0.095288447	0.186146447	0.075949181	-0.186415136	0.042171605	-0.225125166	0.030396716
Q01518	0.034682424	0.112172454	0.040609653	0.11287856	0.046321983	0.030422178	0.12633778	0.030421159
Q9UPQ0	0.050626466	0.264916912	0.197585067	0.042182253	-0.072351221	0.290454481	0.096556564	0.030434781
Q92917	0.021097373	0.640366627	-0.020110282	0.635117836	0.075820435	0.135693614	-0.100326798	0.030435974
Q9Y303	-0.039326259	0.573169131	-0.038707446	0.453717887	0.053960804	0.433806304	-0.179323536	0.030521841
Q96KB5	-0.063791195	0.272788241	0.160391315	0.001369507	-0.019563451	0.789413241	-0.168831868	0.030534943
P04259	-0.089856803	0.085015612	-0.049960786	0.480700325	0.017509087	0.855170859	0.120122382	0.030547452
Q14766	0.270106471	0.227973292	0.113683062	0.634038948	-0.007818563	0.962948569	0.513544109	0.030718513
Q9NYJ8	0.073933439	0.680623957	0.271591099	0.033278755	0.103696754	0.291560399	-0.388674304	0.030727602
O43402	-0.00345553	0.949120704	0.154666144	0.085633227	0.038535907	0.609756839	-0.124670902	0.031041444
P62829	0.036598285	0.257489927	0.082443427	0.031000673	0.095150429	0.197718575	-0.172507414	0.03107073
Q9Y3B8	-0.092798767	0.018806853	0.011763881	0.702762378	0.023358215	0.644057332	-0.093968535	0.031107042
P05187	0.197303257	0.082515622	-0.005185347	0.828854117	0.134126784	0.276015341	0.141511767	0.03119632
Q96K21	0.067279787	0.512059897	-0.033900931	0.829827163	-0.210475548	0.518045036	1.021784408	0.031281684
Q6WCQ1	0.028214112	0.760105294	0.043067339	0.543484837	-0.034247992	0.559461385	0.130402498	0.031303817
Q96PZ0	-0.163190315	0.132995931	0.109492918	0.081703755	-0.038982099	0.517135554	0.113697118	0.031485523
Q9UL25	0.045178007	0.444657789	0.075843568	0.264789554	0.040201008	0.530095724	0.126795034	0.031486573
Q8TED0	-0.040131983	0.271023023	-0.033285668	0.218847598	0.042859935	0.335570556	0.14975894	0.031500889
Q13523	-0.044264292	0.275156898	-0.018697608	0.639730827	0.045476887	0.204330369	0.147694619	0.031590555
Q13438	0.00469176	0.968337768	0.045405494	0.282454482	-0.108488698	0.21610886	-0.267382417	0.03177783
Q8TE67	0.038448201	0.438048674	-0.027344765	0.376700282	0.002598222	0.94548719	0.167704014	0.031862465
Q96HC4	-0.000422646	0.993358668	-0.007211902	0.850880363	0.024853657	0.532082119	0.110609945	0.032034103
P36543	-0.014179342	0.650887663	-0.013765555	0.680415802	0.002171533	0.947783611	-0.122390674	0.032065687
Q86YQ8	-0.009933989	0.933740913	0.199913058	0.015706102	0.114765312	0.384480661	-0.23650652	0.032168334
P28300	0.124711295	0.541218504	-0.006302298	0.97491331	0.063843227	0.736401525	-0.412449569	0.032193633
P14923	-0.022520204	0.475009898	-0.041140085	0.429636231	0.059294729	0.158501836	0.150619373	0.032363418
Q9UJC5	0.129166844	0.002258416	0.089351034	0.176650836	0.06665026	0.10752363	-0.237777438	0.032381619
Q13753	0.170157249	0.011051144	0.070473357	0.232283519	-0.012528654	0.748490193	0.531024458	0.032457143
Q13123	-0.048107597	0.22857898	0.061709894	0.221315951	0.009805734	0.668846136	-0.11826612	0.032472271
Q96S19	-0.044455996	0.697054027	0.399535346	0.03575312	0.064808572	0.561036305	-0.422832819	0.032486955
P62306	-0.030446815	0.737594386	0.004922481	0.948072715	0.05458477	0.158833914	0.280740964	0.032581207
Q92504	-0.010022451	0.904081573	-0.085367562	0.533147357	0.077091255	0.409330797	0.152884102	0.032703999
Q13885	0.000678032	0.986815077	0.014944582	0.700967808	0.038101788	0.412870988	0.167522603	0.032709224
Q96M96	0.050975398	0.072199284	-0.004505331	0.918580479	0.079335246	0.028237703	0.101815917	0.032710168
Q8NBS9	-0.019642977	0.616438133	0.080394099	0.067541504	0.030429484	0.367980854	0.162298268	0.032780745
Q9UPW0	-1.324227128	0.047574495	0.633330803	0.005954134	-0.902310251	0.011942457	-0.340501032	0.032804524
P29692	-0.014152651	0.650757822	-0.009959926	0.69186135	0.028762425	0.447312416	0.138605208	0.032807288
P24844	0.015361164	0.784358302	0.040936099	0.291772705	0.014946565	0.74391206	0.103903162	0.032842144
P28340	0.005814712	0.829475858	0.076592941	0.149896895	-0.007441054	0.916941735	-0.149013718	0.032888658
Q9P1U1	-0.019925948	0.740278913	0.066903385	0.397766198	-0.013106358	0.881767345	0.25046267	0.03293644
P45973	-0.08322212	0.247234734	0.1922761	0.02708683	0.041277209	0.430082251	-0.1594246	0.033004489
Q9BYC9	-0.006216301	0.939488733	0.00577293	0.946094284	0.106518794	0.084695419	-0.223917743	0.033013835
Q16822	0.048543731	0.112543657	-0.001360507	0.922391468	0.057969304	0.033011178	0.07758867	0.033046232
Q15813	-0.031569675	0.587988407	0.045600555	0.135158097	0.049771214	0.178131465	-0.205617016	0.0330976
Q9Y5U2	0.136313905	0.156883497	-0.047905195	0.589011836	0.071315929	0.409672864	0.241899835	0.033110513
Q7Z6J0	0.095404155	0.464839655	0.055624539	0.555437811	0.060440623	0.646243388	0.289174196	0.033201387
Q49A26	0.038364666	0.372724206	-0.0373699	0.291035633	0.004945803	0.945079595	-0.191831747	0.03321608
P54652	-0.116696189	0.079434787	0.005748451	0.809404129	-0.001843472	0.948989608	0.110538334	0.03323983
O14880	0.012722755	0.674879257	-0.052081373	0.220979714	0.056085064	0.201296132	-0.034730301	0.033243345
Q1RMK2	0.216767898	0.230899859	0.032600042	0.720742644	0.297917572	0.062624507	0.378206135	0.033254194
Q14103	-0.127683282	0.060040567	0.03434788	0.722458054	0.147205294	0.20675594	0.111938388	0.033276872
O95801	-0.024893481	0.744736268	0.08266765	0.248309906	0.036738763	0.544310023	-0.10372268	0.033287722
Q9H147	0.074942497	0.328260872	-0.003388475	0.970217734	0.15227434	0.334245306	0.104054272	0.033299507
P50448	0.015077987	0.910198834	0.075864806	0.734892604	-0.03249494	0.910085151	0.636883489	0.033392475
Q14696	0.001710443	0.96091696	0.063489358	0.088377159	0.04575357	0.321761975	0.107737766	0.033403776
P49792	-0.01993376	0.520994489	-0.011849544	0.841419332	0.048906127	0.290534933	0.129376415	0.033453425
Q6ZNJ1	0.08335994	0.231988052	0.001842022	0.973513011	0.137769691	0.389785632	-0.220161101	0.033476053
Q15653	0.089099213	0.390571259	0.155462345	0.058807938	0.211941475	0.035209902	-0.194494477	0.033522296
P04216	0.590198323	0.113264929	0.245749786	0.423943022	0.3094334	0.168141323	0.424932085	0.033575452
Q9NY12	0.085862125	0.084819378	0.044907344	0.186857225	0.018508809	0.681118106	0.121125549	0.033624141
P51148	-0.080007292	0.024554009	-0.032403665	0.577350466	0.035535813	0.378807187	0.148632842	0.033637676
Q9BQP9	-0.134444711	0.384171361	0.119918058	0.30030901	0.114229324	0.356296477	-0.143310797	0.033641185
O14646	-0.029384224	0.432642332	-0.009793208	0.872053187	0.071958999	0.254281647	0.124866716	0.033662799
O43292	0.02671685	0.440163152	0.016656679	0.469156063	0.021321119	0.668667931	-0.06486635	0.033685341
Q14764	0.04446928	0.258721383	-0.020822001	0.494647536	0.132925533	0.213831399	0.116087612	0.033712032
Q02790	-0.033179466	0.111575781	0.17810548	0.007206935	0.016743025	0.55999744	0.159501584	0.033724212
P02769	0.106294114	0.231371261	0.667406869	0.029272276	0.412569065	0.08365591	0.702320689	0.033777375
Q8NBQ5	0.021366027	0.200536326	-0.040368435	0.01595222	0.079693967	0.000751549	0.064899251	0.033827852
P49754	0.076790621	0.237239988	-0.045191796	0.702867405	0.081178837	0.303556696	0.141872839	0.033923061
Q15165	0.011710694	0.745855831	-0.025214512	0.334661931	0.045942002	0.265375658	0.109264384	0.033974059
Q9UNP9	-0.060671813	0.084145269	0.072504851	0.153262757	-0.02954263	0.714367409	-0.135497082	0.034012752
Q9UGP8	-0.065547321	0.080282824	0.028954853	0.195524482	0.006663793	0.753509627	0.121528948	0.034059671
Q8TAV3	0.195365278	0.216034746	0.079681084	0.106962736	-0.009448127	0.929365135	-0.203750541	0.034076121
Q8N3E9	0.061808932	0.806225491	0.156794014	0.415360377	-0.007144364	0.893718099	0.207934025	0.034081325
Q9Y2L1	-0.009397378	0.782439197	0.017871235	0.628839665	0.034585738	0.236766137	0.094946888	0.034120159
Q9Y3E7	-0.109362119	0.073014086	-0.052208753	0.592745181	0.034452754	0.547844046	-0.16042536	0.03414864
Q9UBC2	0.027577861	0.362294595	0.00750184	0.802192396	0.020644157	0.759534689	0.075428333	0.034165146
Q96EI5	-0.044440815	0.485989487	0.271207486	0.091655205	0.052998809	0.452276654	-0.241954548	0.03429742
P09467	-0.051212099	0.445761795	0.051199899	0.558596608	-0.026522056	0.698997421	-0.190863653	0.034366264
O15195	-0.010039474	0.883482994	-0.005527272	0.881770161	0.041225977	0.399686322	0.143173	0.03460951
Q9Y2V2	0.025170473	0.641584892	-0.042397655	0.197027212	0.082323627	0.117772864	-0.146214333	0.034610517
O95372	0.033935657	0.109362808	0.020697187	0.310151173	0.056397446	0.05594908	-0.085909442	0.034623076
O15484	-0.01877851	0.587551242	-0.062648815	0.13035494	0.030685526	0.481732711	0.09361748	0.034626902
Q9Y6M0	-0.071811406	0.254585405	0.647299369	0.004743947	-0.010623593	0.901892644	-0.162306909	0.034652572
P27169	0.244648127	0.533549771	0.042657897	0.696580684	-0.18838501	0.501809071	-0.283404026	0.034677991
Q9HBH0	0.098558496	0.333539347	0.11724106	0.130709833	0.053135862	0.137040652	0.226066694	0.034715882
Q8N1Q1	0.000151613	0.998098435	-0.023293605	0.414372834	0.019473825	0.647022782	-0.130084472	0.034766387
Q8N7H5	-0.064495284	0.194501726	0.011888407	0.7108577	0.00831664	0.8199744	-0.098408364	0.034881006
Q9Y5K8	0.00246427	0.955343958	0.010461133	0.780178174	-0.025778532	0.529941788	-0.121213672	0.0350104
P00558	0.136876349	0.212200892	0.110096104	0.08665653	0.071627273	0.596423659	0.114924454	0.035106252
Q9BW91	-0.032533319	0.464164071	-0.025120488	0.42290355	0.078320555	0.050631539	-0.122545681	0.035241186
Q96ES6	-0.046126103	0.496325442	-0.134786847	0.268369582	-0.197086619	0.147728816	-0.317683119	0.035379109
P13489	0.017193487	0.313934365	0.017015052	0.572631434	0.004534638	0.772922907	-0.094564289	0.035403404
P49368	-0.050044597	0.157104428	0.032957074	0.356689707	0.025741103	0.486450349	0.079254197	0.035422962
Q9UI10	0.01293812	0.592581531	0.002798119	0.945622171	0.007955481	0.908843324	-0.108738957	0.035433503
P31948	-0.035592874	0.042660325	-0.000795828	0.958793424	0.06273632	0.005522104	0.033649022	0.035447284
Q12931	-0.049349801	0.120794205	0.045957705	0.026277174	0.003415446	0.902537354	0.097933605	0.035447452
P30419	-0.01799976	0.212170096	-0.066715779	0.010041232	0.040771766	0.047392989	0.110268693	0.035525776
P48147	-0.004216992	0.815187268	-0.031558326	0.389099515	0.062833555	0.271740668	0.050949912	0.03555359
Q12955	0.020069667	0.709405156	-0.046317209	0.179531146	0.03466532	0.316229514	0.109427605	0.035634894
P82094	0.009707663	0.887417242	0.02245593	0.437904115	-0.007267207	0.865782896	0.093527472	0.035644627
Q7Z6Z7	-0.003752084	0.808607303	0.057770875	0.017866419	-0.000370938	0.984631511	-0.038206357	0.035699462
Q6ICL3	0.11779245	0.246183164	0.032577121	0.867213627	0.099002749	0.440429469	-0.192638948	0.035735136
O60488	-0.078492547	0.171851796	0.077146964	0.34411982	0.05994326	0.476062579	0.111575438	0.035744186
Q68DH5	-0.094708903	0.049710721	0.084404186	0.103881072	-0.025796826	0.633537743	0.050322053	0.035751771
C9J7I0	0.149065668	0.010741355	-0.108028549	0.145876133	-0.022588366	0.594984462	-0.332989937	0.035815131
Q9C099	-0.129837001	0.590688459	0.799627554	0.0103016	-1.17533351	0.001344056	0.598377602	0.035857729
P78417	-0.0438668	0.047200757	-0.040066375	0.091427502	0.048040369	0.169729641	-0.062799473	0.036279375
O60216	-0.044326629	0.487369777	0.109370315	0.022076447	-0.01861017	0.653472805	-0.171862513	0.036280838
P68371	-0.019181122	0.418413082	-0.023683624	0.303702179	0.031339249	0.321895878	0.196489471	0.036315693
P30622	0.008815583	0.614001127	-0.003651653	0.831561393	0.034240319	0.337607805	0.124229887	0.036363997
Q01082	0.021686399	0.397301029	-0.006361243	0.762255173	0.041712768	0.003172297	0.089955095	0.036523978
P07954	0.015126937	0.381627628	0.005508135	0.829296287	0.019826873	0.653416352	-0.060913631	0.036540198
Q86V21	0.004253454	0.817234409	0.051212013	0.126751484	0.048374503	0.111764836	-0.044393216	0.036647495
Q9H8W4	0.026673359	0.684716682	0.035214895	0.488117278	0.02765981	0.773516971	0.082331345	0.036679898
Q13813	0.001440473	0.923000781	0.000668883	0.958109671	0.04484267	0.047817254	0.0811708	0.036736175
Q0IIK2	0.04716494	0.239670627	0.158889959	0.049296407	0.086515959	0.136910129	0.162031141	0.036794089
P62750	-0.091862858	0.035042228	-0.008579514	0.769304623	0.041728024	0.313929514	-0.097595048	0.036851956
Q9HC38	0.015075657	0.288495161	0.004136044	0.890870187	0.051898531	0.0728615	-0.080723742	0.036858434
Q6SJ96	0.039989192	0.481968463	0.060710783	0.472494303	0.059188804	0.439577014	0.088035785	0.036861212
P23368	-0.035790835	0.472689432	0.053581056	0.662521179	-0.063822668	0.543833319	0.175491155	0.036895894
Q9NQE9	0.014705813	0.863169572	-0.056489288	0.462417929	0.000916627	0.992211377	0.165366686	0.036940235
Q9NRF8	-0.019989545	0.547120546	-0.051142998	0.38492833	0.069999582	0.438827476	-0.110138557	0.0369816
P35900	-0.016298913	0.561674869	-0.057482452	0.253443881	0.021441611	0.604414489	0.280815032	0.037092228
P35580	0.022509655	0.36632419	0.101942196	0.048189854	0.064674516	0.020087124	0.088972307	0.03714008
P61970	0.015635594	0.574608841	-0.061767722	0.313086094	0.043652612	0.500737609	-0.088136657	0.0372436
P06744	0.052669794	0.445195245	0.057670291	0.09943635	0.077863114	0.3308494	0.089039327	0.037264309
Q2M2H8	-0.04249382	0.398899435	-0.006274486	0.792173015	0.064977203	0.023102204	0.148391965	0.037268051
Q9Y314	-0.048747265	0.718367965	-0.083522454	0.025485371	0.015575183	0.677391056	-0.303813193	0.037303781
Q8TCJ2	0.030246723	0.162359576	0.020807345	0.422935636	0.09615786	0.024490331	0.098162457	0.037349959
Q8WW12	0.019571754	0.568346123	0.035894866	0.277269897	0.091701132	0.022336514	0.127710098	0.037470555
Q9BZL4	0.068753654	0.131822406	-0.023312618	0.758387361	0.038079183	0.364530698	-0.111678449	0.037609396
Q9UBU9	-0.051972029	0.006607255	0.009837314	0.839297396	-0.038586092	0.693612193	0.100529907	0.03765386
Q12805	-0.216845702	0.310363566	0.513479925	0.092303966	-0.348270359	0.058841798	0.276628675	0.037701634
Q9BW60	-0.139653181	0.29648772	-0.006425492	0.962902959	0.110801125	0.442132505	0.339500644	0.037723629
P38919	-0.020408146	0.291412763	0.051697009	0.1160336	0.073996137	0.077777799	0.043857711	0.037792746
P29992	-0.062295198	0.042557723	0.004377281	0.900635628	-0.020924652	0.554936575	0.110676988	0.037886951
Q9BV20	-0.031592745	0.477715487	-0.000219144	0.996331768	0.078435891	0.140670057	-0.150933132	0.037932967
P08727	-0.017614622	0.771443791	-0.019034093	0.731373475	0.066240566	0.109810491	0.172756993	0.038277703
P62070	-0.009175867	0.877003188	0.038931558	0.199101386	0.050942785	0.514864001	0.161780886	0.038328324
Q93050	-0.006364757	0.813925327	0.023835567	0.402802839	-0.009256542	0.602889119	0.080155644	0.03838277
O14981	-0.067449719	0.00017584	-0.089308807	0.387556928	0.15913654	0.072371833	0.144687497	0.038497482
O94766	-0.122018639	0.286127282	0.118421399	0.440949147	-0.293347564	0.002273267	0.442261233	0.038532453
Q9UNH7	-0.084316008	0.004489444	0.032099138	0.087865475	-0.036830172	0.119007767	-0.082752899	0.03860998
P55263	-0.018132514	0.292690997	-0.008810732	0.577526658	0.064334635	0.104645284	-0.078421313	0.038624628
P14410	-0.143779504	0.315026407	-0.169217514	0.162027063	0.053208278	0.794807989	-0.214497785	0.038691445
Q12849	-0.083805026	0.008116593	0.093213599	0.116284339	0.057192562	0.076843473	-0.128044905	0.038706486
P61247	-0.044528321	0.143739642	0.013709504	0.717825127	0.042219424	0.009562869	0.078466595	0.038725089
P55157	0.016051775	0.447043079	0.01628791	0.275095616	0.048506225	0.211640286	0.163080734	0.038747025
O00189	0.178439253	0.155736526	-0.165089119	0.074927815	0.071247458	0.188204648	0.147640768	0.038778642
Q8IVS8	-0.062283417	0.295472707	-0.00494789	0.944200842	0.062578077	0.193351949	0.173731117	0.03880863
P48444	0.041053713	0.023107957	0.001192245	0.863487968	0.045039205	0.019280169	0.040656346	0.039083073
P31321	-0.029003499	0.889148764	-0.003632178	0.972050602	-0.136837554	0.315978409	-0.218657897	0.039085813
P04843	0.01067084	0.600572162	0.009894089	0.204645299	0.0559469	0.032816917	0.069984144	0.039179045
Q9C0B5	-0.05157285	0.435282897	-0.09037913	0.426183963	-0.086891906	0.189615251	-0.136109904	0.039213892
P02769	0.043548975	0.577524795	0.417801008	0.022510518	0.395305083	0.087909062	0.750209552	0.039237099
A3KMH1	-0.098945344	0.092023146	-0.070292114	0.310325115	-0.002964328	0.945781892	0.087074135	0.039248961
Q9NZN4	0.074436853	0.077131842	0.345568014	0.008573634	0.001027507	0.990693666	-0.235096507	0.03927985
Q6IA17	-0.060271495	0.476956501	0.100105396	0.341793804	-0.126183001	0.162601038	-0.327605208	0.039294476
Q8IUW5	0.013949966	0.694902624	0.099742807	0.247134352	0.139463905	0.258389336	0.217197648	0.039300732
Q9H0R6	-0.039144297	0.174521296	-0.042120139	0.590816382	0.0525849	0.179839484	0.12363908	0.039428305
P33992	-0.06635662	0.03395655	-0.013062747	0.565287356	0.017565415	0.741849998	-0.048425547	0.039557285
O75380	-0.101303856	0.03488649	0.092485554	0.184992708	0.044108634	0.518368756	0.165903698	0.0396127
Q14573	-0.037651784	0.620682448	0.102422421	0.167199729	0.096004703	0.268146727	0.164093132	0.039691723
Q969M1	-0.105228539	0.233431815	0.014840099	0.863457118	0.100641664	0.193731141	0.146940463	0.039752253
Q6PD74	0.060725589	0.337262683	-0.091471013	0.077764276	0.045621387	0.443403484	-0.21782465	0.039807618
Q13885	-0.027012061	0.682823631	-0.018013035	0.681702695	-0.006231575	0.930523972	0.254876976	0.039821071
Q9NYU1	0.00558505	0.927086131	-0.054878101	0.541126615	0.146459234	0.053193088	0.120578867	0.039838262
Q15041	-0.051784567	0.421227609	0.02074297	0.661370592	0.04023758	0.043022874	-0.109414491	0.039853918
Q9NVV5	0.103003831	0.472537244	0.188907218	0.121219261	0.149750631	0.256920254	0.19297163	0.039890759
Q8N2F6	0.032087289	0.790534779	-0.068643652	0.599771697	0.001991898	0.988454851	0.169159009	0.039898445
Q86UK7	-0.071199687	0.246573703	0.000426664	0.994622924	0.032844624	0.260348641	0.191041076	0.039967662
P46783	0.006612581	0.653828464	0.007804105	0.546702642	0.053931816	0.158032192	0.061968541	0.040064989
O95782	-0.010402492	0.847229805	0.01801376	0.601923096	0.055334438	0.22201304	0.087907318	0.040173242
Q8TCA0	0.062314345	0.426977175	-0.088412004	0.341761087	0.161505491	0.101497533	-0.155787601	0.040197993
P51532	-0.03142596	0.522352485	0.130258051	0.019991277	-0.028903858	0.687238267	-0.108480558	0.040199715
O43704	0.011733487	0.8778646	-0.041822325	0.282125854	0.061107442	0.361522045	-0.11645102	0.040227577
Q9Y2D5	0.033481088	0.709320253	0.095844688	0.095960563	0.044657456	0.38676546	0.117820182	0.040347096
P0DP25	0.323449176	0.044311436	0.134015607	0.404141405	0.306975644	0.033086561	-0.331127197	0.040582034
P18564	0.096554378	0.119994243	0.093914463	0.440050332	-0.010854334	0.939458539	0.360917164	0.040595986
P31153	-0.04298205	0.012591624	0.033949531	0.330524796	0.005790969	0.682000358	0.163611228	0.040708196
Q9GZN8	-0.102743282	0.152050782	-0.014523368	0.604321796	0.106430389	0.196229269	0.119060431	0.040749236
Q9HBB8	0.144857228	0.231562952	0.022204355	0.822445398	-0.008107223	0.890344001	0.264362838	0.040781236
P01116	-0.055735819	0.505714909	-0.00770457	0.897430657	0.033248422	0.441259842	0.142533626	0.040785024
Q9UBK9	0.015165097	0.709540926	0.199933762	0.036103407	0.166361247	0.209604697	0.520262929	0.04089858
Q9UFF9	0.044324928	0.601881727	-0.019842256	0.911361129	0.20816094	0.118302582	-0.305361512	0.040990589
Q9H0P0	-0.095724175	0.009854911	-0.032124086	0.235815925	0.04842138	0.147553351	0.078255476	0.041149601
P83881	-0.157037287	0.01225362	0.002893764	0.957285223	0.004864634	0.943800143	-0.249426114	0.041189016
Q9Y5T5	-0.032888958	0.817903874	0.173857112	0.022060741	-0.106653116	0.396052572	-0.547118043	0.04119509
P21964	-0.008199035	0.706157217	-0.007491793	0.789569954	0.027510787	0.401640183	-0.113984606	0.041223006
P62195	-0.070297348	0.004610531	-0.003206365	0.80497623	0.003811803	0.885634128	0.042348501	0.041272207
Q9Y5R8	0.113579624	0.065000199	-0.052471667	0.364741607	0.073953854	0.34218232	-0.160784748	0.041304358
P15311	0.008802781	0.753759383	0.027213863	0.380329009	0.026814168	0.633080268	0.120807209	0.041319387
Q5T2W1	0.079504698	0.099634532	0.00999498	0.734438988	0.049694556	0.417124354	0.040460912	0.04134568
O43488	0.077489403	0.092975181	-0.038270737	0.303258431	0.04630302	0.192942807	-0.097972276	0.041396382
P38571	0.023367529	0.56496815	0.048266652	0.053576881	0.078885117	0.064094582	-0.112802245	0.041446359
P49720	0.064660576	0.056466129	0.091761275	0.048986043	0.102160977	0.00045783	-0.103862393	0.041450753
Q9NTZ6	-0.058385833	0.04987505	-0.033879219	0.245947091	-0.015294532	0.702693027	0.08196837	0.0415549
P46199	0.006108164	0.759078333	-0.020119219	0.662880859	0.011669628	0.76688218	0.186987537	0.041725126
P07858	-0.005924008	0.885220322	-0.034495212	0.455024813	0.024790613	0.459732245	-0.129314175	0.042023818
P10599	-0.068224746	0.017479701	0.067252709	0.201766122	-0.01010062	0.813408986	-0.082458541	0.042078593
Q12913	0.484916785	0.002039619	0.17266961	0.034160549	0.332710159	0.023144321	0.263456537	0.042086144
P54886	-0.010410347	0.63415296	0.031216444	0.365616789	0.027683368	0.274466683	-0.12490405	0.042109346
Q13247	-0.032750347	0.396280832	0.020860892	0.628963501	0.061426161	0.185256197	0.075301566	0.042141816
Q9NX62	0.149971808	0.034891014	0.053547319	0.086886135	0.09838154	0.140471441	0.150022195	0.042185947
P35914	0.070464961	0.358266172	-0.024461074	0.607472892	0.046292935	0.437895819	0.153192697	0.042257993
P61006	-0.017098628	0.37815838	-0.011886573	0.550560632	0.016452745	0.504773219	0.061617591	0.04229667
Q8TEM1	-0.003887243	0.84361851	0.097870579	0.051314524	0.000822285	0.969758891	0.119364042	0.042330254
O43688	-0.040418295	0.860043413	0.242534648	0.236129705	0.161689296	0.592242703	0.361680007	0.042342357
P78316	-0.11620467	0.003774998	0.057051332	0.035164668	-0.043990575	0.450694498	-0.23899976	0.042416919
Q15434	-0.003766631	0.937027208	0.130206109	0.354229537	0.07371987	0.067735001	0.107686071	0.042463578
P42574	-0.029121156	0.73715607	0.0040268	0.923992096	0.021179486	0.716388006	-0.226946912	0.042513252
P04075	0.095082456	0.458841629	0.096353904	0.205036953	0.078063828	0.55752244	0.204072126	0.042614277
P46934	0.050937232	0.004062685	-0.032859019	0.061718985	0.004690212	0.777297011	-0.066694178	0.0426143
P46783	-0.101829529	0.076633292	0.033519508	0.465813845	0.016184671	0.684649047	0.074595174	0.042674649
O43396	0.063211804	0.086359038	0.100667953	0.020735167	0.00351202	0.893897927	-0.143548761	0.042764759
P00352	-0.051835729	0.201346057	-0.123986583	0.021992016	0.063959863	0.483249168	-0.135249501	0.042800004
Q8N2G8	-0.057417257	0.242127632	0.006214076	0.945623675	-0.006219863	0.960913717	0.182335351	0.042816026
Q9Y263	0.066175704	0.099206579	0.373996106	0.008145932	0.002767823	0.951264962	0.122523928	0.042893692
Q9Y613	-0.113798564	0.168862625	0.057586748	0.365397771	-0.143944948	0.105085276	-0.215073262	0.042901669
Q9H773	-0.108557299	0.037980669	0.077403095	0.356304997	0.001137311	0.975226364	-0.130267012	0.042936394
P78310	0.163857263	0.012703703	0.041477866	0.573489717	0.09003914	0.38941216	0.229209185	0.042971474
P07996	-0.006729789	0.968397504	-0.037752214	0.868756365	-0.154419438	0.527860841	0.350454848	0.043037582
Q8N4B1	-0.062402539	0.17685284	-0.11243854	0.051159102	-0.007884974	0.895944094	0.06669206	0.043079035
O75534	-0.048678099	0.090860942	0.04659362	0.045203061	0.023648688	0.664293486	-0.060007807	0.043090356
Q96FC7	0.059086368	0.033161129	-0.046191079	0.384393261	0.086312137	0.177504844	-0.16728306	0.043208997
Q12769	0.000341017	0.987064946	0.019331515	0.175024938	0.020990907	0.624487181	0.102621973	0.043354934
Q9UDR5	0.051451334	0.371841382	-0.010462011	0.819641176	0.108256581	0.232620636	0.190128772	0.043364726
O60568	0.077137421	0.219545866	0.101351385	0.137571288	0.02620941	0.499715007	0.13015862	0.043436617
Q08170	0.074463256	0.103010393	0.090074824	0.035592082	0.135719826	0.049114804	0.1379446	0.043448411
P17612	0.034335323	0.393420839	-0.029176603	0.566567695	0.051026333	0.516565982	-0.067703103	0.043455107
P27144	0.050135736	0.482965057	0.009769227	0.822015014	0.064796976	0.341079797	0.091056467	0.043483056
Q9Y2S7	0.015883494	0.613557533	0.033942165	0.192138464	0.045835299	0.038372928	0.097068943	0.043555466
P0DMV9	-0.002005575	0.929632146	0.033026	0.468680103	0.053309622	0.00179905	0.089464649	0.043759613
Q5VTR2	-0.168674351	0.020127321	0.039442787	0.505700261	-0.064224884	0.217434427	-0.131433056	0.043834692
P30084	-0.021221614	0.401802265	-0.026023634	0.473775	0.056484838	0.172500599	0.078168582	0.043866711
Q8TD06	-0.064957723	0.453259853	-0.132952033	0.08636629	0.063524851	0.521146283	0.140824963	0.043956525
P61981	0.032175263	0.276072554	0.076379673	0.132272355	0.062574013	0.229900986	0.137483171	0.043962668
Q6UWP2	0.040860042	0.280353959	-0.02390579	0.562690114	0.010775616	0.519568495	-0.15442457	0.044158189
P31949	0.029620751	0.420569334	0.010491242	0.796256039	0.041035585	0.427027343	-0.097428061	0.044267073
P06576	-0.056066804	0.074403524	0.014230929	0.505659162	0.011079276	0.781872946	0.116759177	0.044313387
P30536	-0.050519346	0.719135535	0.309141079	0.070911425	0.030204232	0.424406282	0.218700001	0.044329862
Q7Z4W1	0.056508331	0.140387432	-0.041939736	0.454734317	0.01049836	0.825387949	-0.067250591	0.044336831
P00742	0.186149202	0.158806553	-0.040280607	0.747168415	-0.205500152	0.000605073	-0.616661273	0.044460128
Q9NWQ8	0.156439249	0.187734624	0.082809168	0.20910434	-0.02934222	0.718372827	0.18542106	0.044460976
P11274	-0.2381539	0.012032341	-0.080402902	0.542671565	-0.088700591	0.350673979	-0.220850189	0.044551969
Q99685	0.133509902	0.393435356	-0.077487703	0.417626019	-0.064312374	0.420433183	0.36759731	0.044688367
P13667	0.043735996	0.560100705	-0.104278884	0.23976772	-0.04496043	0.616024953	-0.141628215	0.044736827
Q99590	-0.00674615	0.701323722	0.022466236	0.502539203	0.006798954	0.869647464	-0.145532431	0.044757995
Q96A49	0.072877002	0.059982616	0.012490791	0.701758495	0.01553555	0.722969836	-0.075648724	0.04476426
Q13885	-0.064993776	0.081870032	-0.036394144	0.354002068	0.032866954	0.047976583	0.161678445	0.044804588
P13797	-0.012384403	0.569396047	0.138349852	0.000467218	0.003956807	0.901061086	-0.188291924	0.044826241
P53701	-0.116905138	0.138422559	0.009240069	0.902726119	0.040030757	0.405350633	-0.129593316	0.044868962
Q9UGK3	-0.031926609	0.563431387	0.027785941	0.629962443	0.030023042	0.480785637	-0.096201747	0.044996575
Q4U2R6	-0.011259389	0.710224646	-0.01380496	0.835543885	0.077193776	0.285245676	-0.118265663	0.045215915
Q9P013	-0.047720374	0.567742268	0.077155642	0.364660217	0.12357456	0.003596335	-0.140295864	0.045218767
Q9UP95	-0.005706685	0.925407071	0.019681662	0.847859891	-0.024433683	0.809733318	0.169909169	0.045484045
Q16832	-0.001702319	0.991716369	0.069936211	0.692097073	-0.006467555	0.954116877	-0.384675517	0.045500188
O14744	-0.068934161	0.112171509	0.048237958	0.390146226	0.062572513	0.140590709	0.612129876	0.045514861
P78362	-0.028335102	0.392630886	0.063132038	0.367154134	-0.022468894	0.778151981	-0.184924577	0.045516093
P13688	0.281848104	0.254802623	0.08164395	0.563876622	0.095002381	0.091635106	0.289754901	0.045524259
P24752	-0.043146388	0.088408995	0.00261812	0.953226462	0.024286538	0.442632515	0.071037147	0.0455364
P09884	-0.009130359	0.858838427	0.182277444	0.088882899	-0.023016438	0.67846629	-0.19346175	0.04565963
O95757	0.041837897	0.713976257	-0.032920155	0.746036669	0.048974561	0.505823377	0.168233364	0.045694604
P52272	-0.03305066	0.062276861	-0.008330563	0.741675578	0.033055379	0.404569997	0.087542818	0.04579195
P63096	-0.110918776	0.137656779	0.060411069	0.314112021	-0.113910878	0.044445062	0.195569458	0.045922174
P31327	-0.068834296	0.013543732	0.421491369	0.000992718	0.011824107	0.627673399	0.106731684	0.045928781
P28331	-0.071503632	0.075696284	0.056775989	0.127017387	0.013799536	0.655439233	0.069250957	0.045980705
Q96MW1	-0.080444251	0.066699967	-0.027686682	0.438590207	0.044006815	0.269988356	-0.164565378	0.045990348
O95429	-0.024243295	0.917413293	0.205487736	0.280514448	0.008926702	0.957895059	-0.55242032	0.046037142
Q12904	-0.062947986	0.139360077	0.012122336	0.678727072	0.046147369	0.295566455	0.153995905	0.046039568
Q14152	-0.003111648	0.883833844	0.049796587	0.107785689	0.031550687	0.226104118	-0.118513443	0.046063341
Q14432	0.005999494	0.908761366	0.177706578	0.027516939	-0.014208503	0.671987851	-0.251410405	0.046103631
Q9NWT8	-0.059882094	0.44612555	-0.035517216	0.811963276	0.018178525	0.867316927	-0.118442643	0.046152021
P48029	0.275630536	0.354110812	0.308093517	0.085039539	0.024732566	0.912539591	0.463561416	0.046190462
Q9UBQ7	0.036429399	0.261184651	0.032824464	0.194322427	0.095638293	0.246247882	-0.098220064	0.046240518
Q9NV96	0.090315562	0.321999471	0.08057185	0.42294184	0.058232904	0.477014544	-0.212323938	0.046276948
P49593	-0.042272065	0.907861722	-0.25110396	0.364568306	0.063241698	0.85311853	0.470641215	0.046306349
P31040	0.039927969	0.252153184	0.121827887	0.016937445	0.088615774	0.106095804	0.119625207	0.046353886
Q9H5V8	0.028587043	0.72326602	0.032918255	0.537261645	0.019902342	0.806815043	0.124649011	0.046380964
Q9BV40	0.176985072	0.610141602	-0.013087691	0.837372244	-0.042596682	0.504469917	-0.173855347	0.046381014
P16455	0.052505414	0.317004707	0.002221057	0.964756943	0.036600897	0.435009177	-0.149392273	0.046382988
P55196	0.005991928	0.64604994	-0.030748319	0.027930682	0.057829324	0.022842183	0.068242802	0.046468436
Q9BQL6	-0.087111891	0.098745083	0.032392816	0.494296849	-0.220748547	0.005354411	-0.069537527	0.046487191
O95299	0.033961934	0.333583351	0.089448216	0.000101571	0.021301944	0.536138585	0.105929982	0.046648534
O43765	-0.065904571	0.126199957	-0.025162367	0.314216662	0.014040622	0.470639826	0.054968266	0.046656989
Q9BXY0	-0.108942352	0.167594458	0.041746143	0.666348843	-0.053747401	0.774302363	0.136211362	0.046679377
Q5JTV8	-0.139495647	0.182450905	-0.026899576	0.725991113	0.041880236	0.812354299	-0.683924493	0.046708773
O95819	-0.102193645	0.397555531	0.079138045	0.446220514	0.092252346	0.344488025	0.229007104	0.04692838
Q13393	-0.024943194	0.754719556	0.034817588	0.616524904	0.105233571	0.222309573	0.122479042	0.047252537
O95453	-0.022131657	0.647338158	0.020828186	0.727493747	0.081759114	0.077983801	-0.089355655	0.047306493
P46778	-0.042428191	0.023410408	-0.030402396	0.348737931	0.051540815	0.341376188	-0.072241009	0.04741153
P61218	0.074682046	0.644238205	0.240601558	0.203799007	0.068545628	0.670273997	-0.567288841	0.04744025
Q9BTY2	-0.031189533	0.643465219	0.00821487	0.832377894	0.034939369	0.525108315	-0.097663073	0.047497287
O00231	-0.034576816	0.047277295	-0.009389359	0.786465039	0.023233126	0.468052605	0.065144354	0.047589849
P62826	-0.016487448	0.340407115	-0.007589693	0.561447315	0.075778502	0.010375676	0.139168694	0.047599583
O14745	0.011003387	0.756888508	0.015687186	0.401617695	0.027483356	0.29207611	-0.12566318	0.047617342
Q9Y343	0.102442076	0.264772297	-0.124309426	0.129844574	-0.06809006	0.521140281	-0.346543882	0.047661281
Q86WJ1	-0.030289397	0.61649705	-0.024788655	0.686909754	0.066706556	0.406565376	-0.10320948	0.047724755
P12931	0.087635426	0.135298728	0.018648138	0.724219725	0.047842738	0.490984524	-0.138961066	0.047915151
Q6UB35	-0.089566472	0.06571794	0.178898061	0.000625798	0.055892009	0.062486405	0.089574318	0.047919601
Q9Y3E5	0.084453814	0.119807384	0.028843081	0.528591714	0.038522561	0.472060712	0.225137015	0.04795993
Q9H0C8	0.060491521	0.193492998	-0.088493055	0.106347519	0.129998555	0.008073624	0.059812869	0.04800186
P51149	-5.19341E-05	0.997235593	0.020868401	0.551322313	0.040076498	0.321014794	0.08498106	0.048008073
O94822	0.04593545	0.131756942	-0.006749538	0.848463201	0.066138014	0.457487647	-0.114798367	0.04812031
P05496	-0.072840893	0.225148708	-0.066255623	0.42344887	0.067859704	0.24773008	0.121994561	0.048126892
P05362	0.091838463	0.202990321	0.004539733	0.935169021	0.065703004	0.525707973	0.132745053	0.048156729
Q99747	-0.008380807	0.788504127	-0.054563512	0.036119072	0.038791023	0.237909237	-0.03276845	0.048181477
P52306	0.00282086	0.914866571	0.161943981	0.003730602	0.07769218	0.170023998	0.082297014	0.048226069
Q14240	0.000750277	0.986347629	-0.017964737	0.335038881	0.056208933	0.275099324	-0.05633909	0.048275279
Q3SX09	0.060563732	0.46639366	0.687171418	0.010199049	-0.030065539	0.755533322	0.266099503	0.048346229
Q14641	-0.039961546	0.840383889	-0.155206191	0.384451828	-0.014007198	0.942576642	-1.137062484	0.048540904
P41223	-0.053702475	0.418427561	-0.017700878	0.788536323	-0.003779892	0.954843498	-0.386161492	0.048673942
P36542	-0.037594221	0.305472699	-0.019045824	0.329702443	0.055946324	0.262725684	0.053097299	0.048674894
Q969G3	-0.018553109	0.629635776	0.034521926	0.033423321	0.049814081	0.167325309	0.113754878	0.048696263
Q8N806	0.02179987	0.184849624	0.119930102	0.382535828	0.000555271	0.974995314	-0.301225296	0.048749534
Q9Y2Q3	0.061438332	0.110145513	0.003414064	0.923140061	0.032386544	0.397388607	0.084336018	0.048857193
Q92538	0.041689272	0.070241079	0.001232451	0.963103378	0.059466977	0.101295299	-0.100098002	0.049040465
Q13838	-0.002761064	0.807423863	-0.041629935	0.425225913	0.004834417	0.937908643	0.169111098	0.049052673
Q14151	0.089428219	0.056564145	-0.130333806	0.282080573	-0.05464677	0.38758976	0.149582459	0.049130575
Q4G0F5	-0.016861736	0.573953968	0.035591297	0.505667149	0.053758882	0.486431216	-0.12856994	0.049193657
Q9BQE4	0.047701428	0.585346922	-0.088608666	0.228647632	-0.051350181	0.521902214	-0.25828606	0.049353072
Q9Y3D6	0.001998577	0.980051803	0.040780932	0.610848093	0.027466821	0.726952203	0.129723688	0.049386305
O00194	-0.073331023	0.377308161	0.107035686	0.140286629	-0.10848208	0.244741842	-0.127181555	0.049460126
O95486	0.041543408	0.374113087	0.033004153	0.267141183	0.059973281	0.038339839	0.067561596	0.049485661
Q9NQX3	0.002334516	0.967869765	0.06486215	0.347019221	-0.005317674	0.889838971	-0.124406266	0.049510623
P17152	0.108034823	0.141689027	0.004681841	0.905683803	0.08412962	0.000566923	0.268054963	0.04956249
Q96RS6	0.000452201	0.99081536	-0.01160538	0.705972684	0.005197808	0.900184105	0.165060539	0.049564507
Q01081	0.011482698	0.690765548	0.023426159	0.54766379	0.054678995	0.023858904	0.120491069	0.049591107
Q9BPY3	-0.090892537	0.507348384	-0.098754769	0.184267961	0.016439323	0.446264829	0.134987296	0.049721035
Q9Y383	0.019566283	0.162030794	0.087906708	0.010583079	0.038945797	0.459410457	-0.085836455	0.049753338
Q9Y3F4	-0.057509611	0.103846756	0.039246312	0.017931271	0.064320483	0.092882904	0.053945294	0.049851563
Q96NA2	0.044703566	0.721510617	-0.075733313	0.445218292	0.020431553	0.876390716	-0.219194768	0.049981163
O60885	-0.01135051	0.859058572	-0.012869155	0.753388737	-0.046664545	0.479185572	0.156642968	0.049984953
P52815	-0.100086478	0.268325068	0.089887855	0.229504862	-0.014800085	0.864166527	0.151515418	0.050228765
P52564	-0.172491943	0.235334311	-0.027384051	0.497125157	0.018833456	0.681897253	-0.155760594	0.050281526
O60292	-0.015090618	0.61566036	0.003875311	0.937815649	0.030593313	0.575193659	0.118076404	0.050313975
P32519	0.095129915	0.454159078	-0.045624989	0.556970235	0.090799506	0.564646487	-0.283267256	0.050355223
Q9H7M9	0.162901588	0.172749354	-0.014637788	0.909575613	0.157750425	0.051141828	0.281883002	0.050372265
P09848	-0.173538201	0.409267431	0.060337784	0.711363072	-0.030329422	0.808526292	0.422523246	0.050372804
P05556	-0.027569246	0.187336297	0.331695958	0.003935606	0.044837865	0.257410267	0.129130747	0.050383997
Q9P2J5	-0.029306847	0.243640207	0.075500702	0.013338917	0.04616898	0.198419567	0.029365803	0.050389128
P09525	0.038938593	0.565547552	0.020812769	0.610132581	0.052515208	0.509207465	0.14132031	0.050463822
P51690	0.029703416	0.638500547	-0.113374154	0.410348201	0.070236862	0.361899291	-0.160743705	0.050464706
O75947	-0.084496829	0.026973147	0.010994113	0.601371152	0.026617252	0.462512627	0.045198378	0.05047219
Q9UGV2	-0.042751762	0.213889951	0.016259034	0.730242365	0.076168516	0.14273259	-0.082249757	0.050472281
Q86UP2	0.020203798	0.123217759	0.074917189	0.022506032	0.062212345	0.011479356	0.102540986	0.050597947
P35268	-0.079401289	0.019923031	0.032028271	0.381472009	-0.06814858	0.017054025	0.045666777	0.050797114
Q8IV08	0.053610397	0.592028972	0.052197325	0.567422759	-0.021693616	0.827258377	-0.271053323	0.050834427
P24941	-0.181396823	0.005362235	-0.003608937	0.922560012	0.040591683	0.208584415	-0.170844443	0.050867639
Q9Y2G5	0.040151775	0.596780014	-0.517558968	0.023834016	-0.063572106	0.602986394	0.153165972	0.050976626
Q9ULV4	0.083312205	0.030784353	0.03947399	0.223532919	0.108223573	0.067817639	0.178671575	0.050996811
Q96RP9	-0.04050439	0.350244834	0.007503919	0.851762665	0.053144815	0.02652037	-0.065752974	0.051032611
O00757	0.033962781	0.446166513	-0.003442632	0.928072094	-0.033872655	0.605660763	-0.19450184	0.051053648
P14854	0.03123946	0.463880977	0.184274017	0.015884178	-0.155136567	0.127898148	-0.369742484	0.051083417
Q9UJX4	0.032231607	0.717331825	-0.095077295	0.119495957	-0.122449367	0.100213863	-0.142459412	0.05123925
Q9UQ80	-0.030120899	0.452643015	0.04158942	0.320174313	0.034820716	0.337984942	0.070180819	0.051332372
O00468	-0.108018406	0.316579478	-0.017025479	0.647440535	0.011646816	0.801378625	-0.163392108	0.051371948
P53609	0.026366652	0.617355364	0.063789533	0.234647707	0.028377646	0.465874661	0.112585943	0.051599595
Q8NHH9	0.028216524	0.835983038	-0.019131256	0.750914211	0.03007943	0.595005353	0.123460711	0.051645005
Q14435	0.082249212	0.146097645	-0.026665802	0.637831683	0.094494501	0.175463373	0.117024327	0.051718779
Q9Y4C8	0.105890247	0.417219116	0.022543278	0.792637366	0.025462474	0.851453033	0.485552493	0.051734744
Q9Y295	-0.025650417	0.129959301	0.011318947	0.776825156	0.019732894	0.619335074	-0.053476215	0.051768907
Q93100	-0.077842729	0.226756514	-0.01387275	0.894736819	-0.067174521	0.534478172	-0.075699477	0.051799369
O75116	-0.035328142	0.310671314	0.051418199	0.038036389	-0.025037966	0.142600623	-0.087992761	0.051829959
Q12874	0.028511135	0.365674391	0.066087114	0.129753923	0.077592469	0.051974052	0.034984772	0.051985211
P49459	-0.030925892	0.51974787	-0.06545583	0.254969495	0.02572083	0.449787731	0.131839357	0.052047904
Q7Z6K5	0.013211465	0.724067194	0.062211946	0.170658132	0.043410598	0.265283559	-0.20948859	0.052085129
Q8TBE9	0.076489663	0.584371752	0.003626404	0.986437846	0.045755321	0.763223148	0.248654131	0.052163362
Q6P4A8	-0.019312221	0.670020271	-0.049038313	0.518542261	0.000554188	0.989498627	0.148320937	0.052207712
Q8NEW0	-0.07298994	0.170959203	-0.075283313	0.23391638	0.008887399	0.905594818	0.173636888	0.052258122
P07384	-0.022070933	0.541075757	-0.015850602	0.028277203	0.07799981	0.031703092	-0.08493489	0.05234275
O60524	-0.029120695	0.629876767	-0.042555201	0.626341059	0.031411913	0.277697918	-0.156793188	0.052355195
Q9Y277	-0.049480842	0.041164583	-0.012457484	0.432782225	0.033161681	0.381177654	0.084619581	0.052366374
P46926	0.043746704	0.312368984	-0.060684141	0.088067279	0.113643593	0.026298199	-0.148288377	0.052422188
Q15262	0.049451884	0.580423045	-0.016200969	0.631378072	0.08840141	0.300581456	-0.119385536	0.052467147
P57721	0.025746752	0.744971468	-0.056731869	0.614617079	0.035848357	0.37866707	0.093457917	0.052550178
Q9NRG9	0.005838911	0.914914834	-0.016513311	0.762288522	0.090984512	0.05827626	0.249528302	0.052593788
Q13011	0.040611989	0.189064977	0.031758944	0.007045078	-0.018529701	0.438309809	-0.113041641	0.052608166
Q14802	0.026555252	0.472328959	0.051214988	0.197286496	-0.070035819	0.139039359	-0.230299336	0.052799462
Q9NVX2	0.094670859	0.241938449	0.168179539	0.008670874	0.004401879	0.949197041	0.274497195	0.05286652
P13639	-0.019820967	0.372284393	0.030901498	0.33581071	0.045973164	0.021971577	0.117408002	0.053095775
P05204	-0.025532947	0.779655553	0.280779274	0.021000558	0.326419631	0.061597749	0.222632396	0.053153747
Q96QZ7	0.155412791	0.134886105	-0.156915193	0.003715256	-0.168394566	0.196895636	0.097838776	0.053381741
Q8WTS6	-0.092681405	0.346230256	0.223152158	0.088492283	0.042182286	0.542159086	0.225861446	0.053459864
Q9BU68	-0.070335043	0.504850421	-0.049069327	0.33853761	-0.158472682	0.126909371	-0.179874676	0.053674598
Q9Y5P4	0.027056403	0.38726638	0.064159335	0.012817782	-0.028754217	0.419749831	-0.093163332	0.053772034
Q96PK6	0.002355241	0.92912636	0.042477794	0.12907958	0.037404721	0.426911891	0.078912464	0.053806906
Q9Y6Y0	0.145720593	0.035290993	0.084945925	0.133214048	0.05299809	0.505624522	0.201341403	0.053840722
Q6P1L8	-0.030493378	0.20015627	-0.04078713	0.369260017	0.003308306	0.948975295	-0.17657346	0.053848646
P43155	0.037564954	0.419178113	0.059227925	0.16838801	0.027893996	0.358586955	0.081072606	0.05387961
Q9NYZ1	0.031155675	0.475439746	-0.012321134	0.81742122	0.070179058	0.146115058	0.122973947	0.053882218
P33908	0.019097637	0.641214353	0.026499682	0.614108015	0.022131809	0.492201945	-0.10822402	0.053980442
P52701	-0.061611086	0.127325124	0.113801018	0.103982693	-0.004769283	0.918063654	-0.142323991	0.053982174
O94956	-0.028996493	0.854030533	-0.187367953	0.047100255	-0.110793618	0.37448871	-0.635412979	0.054025495
P17301	-0.101038186	0.440185965	-0.028723014	0.796606205	0.238343107	0.293529496	0.353816791	0.054026758
Q96B21	-0.262912204	0.144398494	-0.028199802	0.773825787	-0.065687415	0.651949754	-0.110475165	0.054215261
O75127	-0.093881939	0.189082664	-0.120989444	0.054010439	-0.023944792	0.449307986	-0.15270167	0.054257259
Q68CQ7	-0.15618786	0.12850846	0.367900536	0.18140932	-0.306982752	0.106970675	-0.553508749	0.054370083
Q7Z422	0.002534051	0.989250592	0.140114955	0.406310715	-0.106786337	0.613495059	0.668065251	0.054374267
O14773	0.039297923	0.499373054	-0.009697748	0.843263618	0.030367869	0.216166162	-0.179296072	0.054388602
Q9BY44	-0.026740177	0.350023389	0.014320309	0.669088262	0.066563522	0.124396638	0.113637065	0.054393052
Q9P2E3	-0.177509132	0.271341579	0.052550957	0.559715285	-0.152464704	0.068582763	0.392169653	0.054453984
Q99805	0.0356236	0.307723905	0.029633576	0.463431767	0.085603897	0.158819649	0.102021907	0.054466733
P08727	-0.017583138	0.742424711	-0.060429321	0.249228466	0.030303786	0.482642381	0.158073406	0.054506134
P67936	-0.020203816	0.662489318	0.227750683	0.003021438	-0.020190173	0.610005519	0.167777575	0.054517713
P46736	-0.07044642	0.390293933	0.118416587	0.034798248	-0.174117519	0.000736397	-0.116859133	0.054597893
P61221	-0.06379015	0.064643659	-0.015845687	0.270591488	0.04277856	0.144183732	0.037765976	0.054625381
Q8NI22	0.346869573	0.133483946	0.377209011	0.167215915	0.342697149	0.044402253	-0.416283099	0.05487542
O43752	-0.005984595	0.931516524	0.057798026	0.397762105	-0.002838366	0.971747363	-0.116570166	0.054942129
Q9NXH9	0.029945766	0.820330204	-0.024471249	0.823569339	0.007938117	0.90783846	-0.218063993	0.055159608
P51398	-0.050772617	0.085245137	0.022990945	0.169844082	0.070970201	0.166323471	-0.106653022	0.055180014
Q96ND0	0.098981033	0.249791692	0.039255721	0.195389639	0.099492975	0.247964245	0.189693648	0.055213146
Q16555	-0.002304553	0.959503564	-0.062224205	0.511238639	0.077251245	0.296742573	0.14221781	0.055231498
P49748	0.044554316	0.276353532	0.109584362	0.024665201	0.031977953	0.719003836	0.06778366	0.055266134
O75438	-0.050801215	0.324128626	0.055909443	0.289347558	-0.033122008	0.383933651	-0.11463344	0.055269035
Q9UNF1	0.01898261	0.694242286	0.096365434	0.06832773	0.006728546	0.782897188	-0.178622058	0.055288207
O75674	0.067569155	0.563737026	-0.024804795	0.77801092	-0.031804494	0.727953338	-0.17801235	0.055425013
Q8NAM6	-0.106830218	0.503802631	-0.04540535	0.628086185	-0.099306892	0.315093304	-0.768038042	0.05547234
P34955	-0.03227896	0.746682999	0.349233979	0.002232324	0.135339894	0.09570126	0.277351891	0.055560086
Q96A22	-0.12167474	0.162580904	-0.06834336	0.465374896	0.074525378	0.642773417	-0.176804602	0.055591062
O94979	0.002916978	0.927322069	-0.012195697	0.678633062	0.049117069	0.158750496	0.067039666	0.055650517
P61088	-0.015423413	0.675146115	-0.028064884	0.165694701	0.059047045	0.031774483	-0.067191644	0.055689286
Q9H0W9	0.012370578	0.873492793	0.103083433	0.18609531	-0.000674109	0.987938113	-0.12491002	0.055741044
Q9Y333	-0.056118705	0.361340239	0.02324452	0.53468333	0.058400125	0.367347688	0.107306107	0.055766511
Q6P1N0	0.005547398	0.840386966	0.002944414	0.945855383	0.094103323	0.018372138	-0.127169551	0.055797369
P30405	-0.031856933	0.695087957	0.097629305	0.308995847	0.100298035	0.015517723	0.128893769	0.055822021
Q6ZN28	0.100044972	0.234182348	0.016672975	0.711530516	0.092416653	0.029787018	-0.136867738	0.055901954
Q92598	-0.029783666	0.488641034	0.003931004	0.826860576	0.057413981	0.048025177	0.065269677	0.055984118
P29692	-0.060362238	0.339428557	0.058935085	0.429377085	0.142351877	0.190896269	0.152912853	0.056003289
Q9Y2X7	0.060521031	0.482557315	-0.026706758	0.820590862	0.056157565	0.444742467	-0.26439828	0.056133039
Q9BUR5	0.061374554	0.400794477	-0.016730725	0.863845175	-0.006081976	0.906295237	-0.230165758	0.056200235
P26583	0.043911545	0.277546953	-0.097692076	0.106979625	0.025514271	0.565121874	0.181597752	0.056303407
Q92841	-0.048577958	0.276109589	0.045784414	0.504915689	0.044305184	0.353616227	0.102472848	0.056327741
Q9BQ61	-0.046745414	0.100232205	0.025952482	0.568225257	0.0472034	0.128670258	-0.072678344	0.056359339
O95757	-0.047659361	0.685758205	-0.05131963	0.35400486	0.159378661	0.074854444	-0.145959119	0.056413053
O96013	0.010786435	0.848252686	-0.02153641	0.689971204	0.059676774	0.308324298	-0.055534918	0.05643722
P00338	0.100724865	0.293536955	0.130865131	0.016490084	0.060515428	0.645666386	0.096173195	0.056442757
Q96KP4	0.004911951	0.889199817	0.01698385	0.645011858	0.059865755	0.218222939	0.111093376	0.056545625
Q9HD67	-0.038567916	0.878357451	0.264498293	0.545694939	0.035768707	0.858966472	0.469167619	0.056648944
P25788	-0.02802338	0.009247589	0.002654066	0.897656986	0.048426933	0.014477968	0.054427011	0.056653838
Q15070	-0.034867957	0.492886309	0.066557385	0.06569255	0.052320173	0.415237204	-0.079641464	0.056709815
P08842	-0.040661189	0.743474049	0.045048218	0.434986905	0.04768162	0.494451041	-0.157448494	0.056792357
Q9BUJ2	0.085311463	0.481598702	0.154610269	0.166151584	0.005671019	0.973370048	0.36916395	0.056877013
Q14739	0.000489507	0.98457969	0.016893147	0.378309715	0.055978393	0.311276692	0.0702677	0.056979287
O43865	-0.072927997	0.131733572	-0.013703429	0.58498155	0.028413928	0.325502619	-0.07831216	0.057039045
Q9H857	-0.053841658	0.5272154	0.022126117	0.587013098	0.052471798	0.261957584	-0.084750493	0.057079997
O76095	0.046413496	0.695453072	-0.174760133	0.095519337	-0.000729626	0.994254971	-0.179599004	0.057100089
O15347	-0.129319509	0.136304827	-0.022995444	0.837018422	0.103082533	0.215086974	0.193974487	0.057149527
O15305	0.008946949	0.819095595	0.033973238	0.24903847	-0.001217654	0.976329536	-0.09158187	0.05716262
Q96S66	-0.085578775	0.1658144	0.070506122	0.383879111	-0.207715378	0.196002288	-0.126526374	0.057185402
Q9H444	0.02550268	0.326527993	-0.025235237	0.235803778	0.058719354	0.237064854	-0.053862887	0.057267769
P48556	-0.016127292	0.035074223	0.048022103	0.366029987	0.050450043	0.035132035	0.090783413	0.057390566
Q07065	-0.030122888	0.335352596	0.030582803	0.144088029	-0.001883776	0.930190268	0.154863723	0.057539018
O75832	-0.007647556	0.886709396	-0.027737816	0.598759144	0.058619146	0.055825385	-0.054831837	0.057719241
P09651	-0.051128504	0.243873216	0.036952687	0.562072443	0.010084255	0.875326156	0.18568499	0.057741134
Q8N201	-0.138348143	0.328871917	-0.067633023	0.48298281	-0.065116339	0.55491421	-0.345344801	0.057797842
Q07817	0.08183555	0.0966016	-0.077547613	0.264215896	0.050317759	0.738163367	0.151249386	0.058042709
Q9BUL8	-0.007371175	0.780175401	-0.026540824	0.386606003	0.03648602	0.281317516	0.076800808	0.058084706
Q9NWS0	-0.084960054	0.201573195	0.071159134	0.335101326	0.042552646	0.523423058	-0.121405928	0.058088929
P61604	-0.029049723	0.057195873	-0.049422923	0.098214393	0.054333665	0.127280591	0.072950416	0.058096739
P05386	0.033633463	0.601528335	-0.017483624	0.84357048	0.061833168	0.369169954	0.088938215	0.058514551
Q9P2R7	-0.049204712	0.192668054	-0.042542547	0.103910872	0.048175943	0.142136683	0.15720847	0.058522165
Q9HBK9	-0.084019308	0.183466039	-0.00871725	0.933887104	0.152757623	0.071200307	-0.144456625	0.058725289
Q08752	-0.057659955	0.105484613	0.030417947	0.448869737	0.06740922	0.023416371	-0.112360849	0.058818938
Q92608	0.21339958	0.328986297	-0.047030287	0.680336423	0.215430892	0.162806446	0.323737456	0.059034693
Q8N9N7	0.012602972	0.722491776	-0.025838859	0.659798859	0.043297385	0.226408389	-0.063081492	0.059075143
P20042	-0.053266628	0.021871906	-0.009303726	0.842481325	-0.020672455	0.506473083	-0.071396081	0.059163075
O43166	0.089337742	0.152181711	0.069026161	0.447863881	-0.029194966	0.556868199	-0.162838072	0.059214206
Q9H8H0	-0.058430652	0.228280884	0.0954665	0.026629796	0.018667615	0.530181777	0.113866364	0.059445956
O75351	0.066133426	0.138651478	-0.050841652	0.138658282	0.060958773	0.202884432	-0.098776418	0.059506851
Q9UMY1	-0.098912471	0.225524202	-0.013647946	0.67883543	0.053221207	0.028883796	-0.14663886	0.059604265
O94966	0.085037931	0.475105841	0.144171219	0.319658601	0.058345522	0.537170911	-0.156597905	0.059605736
P11169	0.51516108	0.245857758	0.331446953	0.295099401	0.196688618	0.679831345	0.447807909	0.059858547
Q04864	0.167353891	0.263544048	0.041755991	0.623995685	0.054500491	0.437415144	-0.419708719	0.059869485
Q9UH92	0.074366763	0.451769362	-0.062045938	0.575373346	0.210286781	0.174192891	-0.13876655	0.059963639
Q09666	0.038646522	0.475490335	0.062918899	0.139213117	0.009296332	0.899562469	0.064247055	0.060063225
Q14651	0.014044851	0.661955553	-0.046364304	0.251906858	0.043574781	0.067678493	0.046289056	0.060071938
Q9H098	-0.041443214	0.622136125	0.053985273	0.459938158	-0.030854652	0.68484335	-0.191546859	0.060088004
O15488	0.27636475	0.077633993	-0.213086379	0.310879781	0.092409055	0.516420292	-0.473895725	0.060153705
Q06124	-0.016274596	0.649831023	-0.026237925	0.552988918	0.040680235	0.118460288	0.094132062	0.060216363
Q9BPX1	0.105384167	0.464766793	0.10081249	0.218896277	0.201687812	0.0821482	0.398385323	0.060248981
Q00266	-0.021052522	0.21303423	-0.086766345	0.257199025	-0.016780633	0.70963606	0.090479683	0.06028704
P31751	-0.044776321	0.736376197	0.131036704	0.287938996	0.056187257	0.646451618	-0.211857663	0.060325317
Q9HAA7	-0.016036997	0.793938251	0.170057582	0.119838828	0.086363059	0.197571246	-0.122562624	0.060421137
O00159	0.125707165	0.456344264	0.068567661	0.37576131	0.070612638	0.384271655	0.083771719	0.060464085
Q9HDC9	-0.079313475	0.297635179	0.027438988	0.593678496	0.044754137	0.175374476	0.098209141	0.060468898
O15514	-0.022007457	0.72336334	0.020783297	0.686066694	-0.114044512	0.026701743	-0.292233899	0.060489842
Q58D62	0.014019499	0.893338555	0.408986464	0.001834452	0.046065995	0.573536521	0.285873933	0.060492675
P30622	0.091812602	0.170648585	0.165907309	0.129994649	0.025589614	0.789069367	-0.265515222	0.060683939
O75116	0.000433471	0.98964375	0.066376634	0.331773896	0.01480307	0.769145707	-0.046288675	0.060741953
Q8IV38	-0.160546303	0.013263265	-0.087268674	0.261821403	-0.00232345	0.974449422	0.121256391	0.06082383
Q9BYD1	-0.026686823	0.418835385	-0.022634182	0.363784131	0.016346054	0.797264323	0.245656101	0.060876329
Q7Z434	0.038632823	0.184870246	-0.033756864	0.252588204	0.122041132	0.002257639	-0.055705311	0.061293216
P78318	-0.010792369	0.784919545	0.082425081	0.030002991	-0.019691935	0.542584907	-0.111428902	0.06131763
Q9UPN3	0.020828149	0.739562656	0.052019303	0.045414372	0.011837059	0.749663606	0.100964552	0.061350371
P63173	-0.01658103	0.840244342	0.023406275	0.259316086	0.042107723	0.1759352	0.103036031	0.061509836
Q96FV9	-0.002791025	0.946031029	-0.000712694	0.98794268	0.015415455	0.666975398	0.087347654	0.061518416
Q9NRX6	0.087249997	0.079510453	-0.073656442	0.189539212	0.10577477	0.009880056	0.071681075	0.061538579
P15144	0.073472536	0.160026247	-0.008850892	0.844316351	0.011783241	0.803617149	0.130971008	0.061581775
Q9NS69	-0.063244646	0.677734771	-0.05058954	0.296424742	-0.082853429	0.122460898	0.081759806	0.061902309
P60981	0.018452062	0.166238345	0.182145564	0.00431673	0.075809436	0.055013974	0.089366539	0.061946199
O14777	-0.043768568	0.233321207	0.131072447	0.08689326	0.076694736	0.468105801	-0.292407397	0.06200359
Q9H4K7	-0.000354615	0.998083169	-0.216809514	0.145961597	0.066633598	0.513556166	0.157508284	0.06201165
Q9Y5K6	0.022291461	0.137027683	-0.05195289	0.011741108	0.075416445	0.085409609	0.050519868	0.062021442
P53992	-0.012012708	0.697028102	-0.014947494	0.711139688	0.020546269	0.644055434	-0.068109386	0.062025242
Q16798	0.077462364	0.387063495	-0.049024159	0.646150366	-0.044869545	0.619181006	0.114209422	0.062050685
Q14451	-0.028531026	0.525341896	-0.079896124	0.324815672	0.123830969	0.175329275	-0.174703272	0.062074136
P56211	-0.046287481	0.647525197	-0.005048356	0.964958153	0.007066868	0.935668997	-0.194728973	0.062149454
P42167	0.002105965	0.965447665	0.025927966	0.624147078	0.047480941	0.189296439	0.15905074	0.062186669
P35606	0.02733516	0.330582035	-0.039683587	0.066114885	0.070368822	0.008293958	0.071210573	0.062228619
Q3ZBD7	0.111919855	0.063268353	0.049850679	0.200621504	0.066016666	0.570262522	0.098254968	0.062236364
Q5K4L6	0.120490217	0.317348032	-0.091843448	0.236950472	0.034144039	0.740768765	-0.223613126	0.062270897
Q9BUL9	0.020871921	0.807385631	0.045930162	0.774639193	-0.076725886	0.429110561	-0.190248131	0.062357005
Q9BYJ9	-0.035720699	0.361799699	-0.029295092	0.483959158	0.109369466	0.002752094	0.140067952	0.062407718
Q28107	-0.433218442	0.001149451	0.971613248	0.000235009	-0.601458234	0.003681513	0.543241395	0.062440858
A6NDG6	0.001545031	0.965403479	-0.006769482	0.873563545	0.032986425	0.457436929	-0.138748285	0.062460263
P51571	0.044957806	0.222349848	0.068152523	0.215665963	0.132548792	0.02133582	0.116370614	0.06250929
Q9Y5J7	0.065959578	0.483376946	-0.13778231	0.178409589	-0.021911561	0.728592823	-0.194114626	0.062514281
P13804	0.039506118	0.083780924	-0.000374026	0.983426464	0.041545088	0.181350249	0.083159017	0.062585535
Q16635	0.117630756	0.264662132	0.111731502	0.480235526	-0.056712131	0.675812774	-0.361177341	0.062624317
O60936	0.065335432	0.475010483	-0.035144955	0.158160985	-0.01268253	0.838367068	-0.126435447	0.062644317
Q8WWQ0	-0.094896068	0.510450887	-0.016288443	0.847885858	-0.098206022	0.406403126	-0.227761261	0.062716988
O96000	-0.053405207	0.598872576	0.054183732	0.486704049	-0.014612476	0.901344789	-0.214014566	0.062725576
P46821	-0.105962271	0.577456252	1.89267942	0.059740778	0.204195024	0.029646015	0.37370316	0.062732339
Q10471	0.032565853	0.06710792	0.145757544	0.000108485	0.034021703	0.154563902	0.071876468	0.062770993
Q8TBP6	0.069370169	0.443418059	0.020814189	0.787101634	0.049066347	0.644288929	-0.234505653	0.062910378
Q16706	0.030822416	0.076605322	-0.017620504	0.243557498	0.051690335	0.093466664	-0.06102743	0.062960751
Q14155	0.074532639	0.05071715	0.126705629	0.213048756	0.057801613	0.39985619	-0.121201849	0.063048703
Q96HY7	0.138284672	0.00911805	-0.003797899	0.951120246	0.037602335	0.363496218	-0.078474508	0.063077333
P32321	-0.169353591	0.346876044	-0.055441792	0.149752556	0.014663584	0.779079993	0.169021258	0.063151805
Q9NZZ3	0.004753341	0.808680649	0.050726579	0.362206903	0.059487613	0.385296884	-0.128718507	0.063218317
O43795	-0.006512087	0.744870265	-0.026626864	0.333873467	0.07569099	0.151425066	0.118871698	0.063232912
Q92620	-0.133801267	0.030961184	-0.037807601	0.372994883	0.017620705	0.7345435	-0.184402218	0.063286739
Q6PKG0	-0.063203581	0.180036209	0.08088823	0.058989622	0.046954238	0.284958035	0.058544333	0.063476242
Q01130	-0.045901083	0.368336396	0.171857735	0.078419372	-0.089079369	0.036665371	0.060286015	0.063479697
P20585	0.09824088	0.182770165	0.032351866	0.841498937	0.084068581	0.446612148	-0.329135813	0.063536974
Q8WWM7	-0.079779675	0.115568251	-0.064731507	0.187718076	0.050637258	0.293109409	0.073639353	0.063581723
Q9C035	-0.082239511	0.49083602	0.154548062	0.320085237	0.054313867	0.088846774	-0.246580985	0.063624084
Q7Z7H5	-0.135398244	0.196536405	0.02220622	0.758752306	-0.253367308	0.098726595	-0.325046371	0.063635747
Q14966	-0.020503292	0.326636209	-0.030772107	0.597337121	0.012711688	0.85565609	0.089091412	0.063671722
Q4J6C6	-0.139802608	0.134682281	0.091421741	0.461533655	-0.046488119	0.595504687	-0.262580665	0.064170738
Q15633	0.077107561	0.742731647	-0.011756489	0.907388538	-0.064232207	0.652620463	0.587247303	0.064179266
Q13131	-0.005636471	0.84472704	-0.033002323	0.501800086	-0.002605201	0.964131849	-0.09374477	0.064202032
Q8IWJ2	0.002234871	0.890728425	0.019033182	0.507968747	-0.024789694	0.417344816	0.100646119	0.064379439
P63244	-0.038939867	0.394549096	0.056563726	0.205139466	0.020561545	0.360764215	0.079211016	0.064389731
P49916	0.035122701	0.062851636	0.045562217	0.281919315	0.075928588	0.284963051	0.101810542	0.064457821
Q9NRX2	0.035385074	0.415276493	0.000481706	0.994773625	0.027629323	0.611394531	0.117787348	0.064528545
P16401	-0.322497631	0.473836457	1.382291434	0.351415619	-0.169906606	0.687876953	1.538084483	0.064660675
Q96B77	0.026548534	0.731531657	-0.081207649	0.360284488	0.120025705	0.042537746	-0.109142196	0.064751892
O14548	-0.050584158	0.436687196	0.10222271	0.089085343	0.016146655	0.782931559	0.068131669	0.064790342
Q9BQG2	0.000277867	0.994731624	0.116040275	0.075745443	-0.013697984	0.749204416	-0.22716642	0.064847447
Q12905	0.010867118	0.480262209	-0.012291279	0.784003043	0.078013675	0.171962788	0.101079281	0.065002901
P42704	-0.115493442	0.018403056	0.021676762	0.661479223	0.000657421	0.986935369	-0.051324433	0.065022635
P54652	-0.053429431	0.504454659	-0.050212659	0.583560966	0.028034369	0.690696309	0.131435389	0.065350755
Q96DE0	0.058063383	0.233234794	0.029672061	0.724122861	0.096303903	0.195622235	-0.110213272	0.065444542
P20700	-0.042799696	0.015040592	0.099629902	0.032987572	0.015394631	0.750512054	0.050340741	0.065604246
Q9HB21	0.175638776	0.148872193	0.070891975	0.434713443	0.091385299	0.166631465	0.179440427	0.065605737
O14672	-0.00840444	0.890251996	-0.04545174	0.182289994	0.067562812	0.29110914	0.162147017	0.065624862
Q13618	0.00884719	0.836912949	-0.066956088	0.449602167	0.012213535	0.583467676	-0.103491381	0.065631284
P23246	-0.13481349	0.097409867	0.171335893	0.207306947	-0.021519097	0.748714244	-0.140119222	0.065764123
Q69YQ0	0.032613801	0.60362804	0.006103709	0.830030201	0.051548925	0.193138587	0.106278559	0.065828838
P21741	-0.309463789	0.231730749	-0.09989234	0.589676672	0.261054629	0.222561532	-0.699860171	0.066029825
Q96H55	0.052342805	0.768702517	0.062364532	0.742628775	-0.172630734	0.290338867	-0.481896918	0.066067614
O75843	0.005736237	0.941348704	9.35307E-05	0.998266475	0.04189877	0.459499079	-0.201707589	0.066089557
Q6PCB5	0.066456984	0.457324378	0.017429378	0.73665365	-0.115952328	0.146230168	-0.218634826	0.066127795
Q15369	-0.008109329	0.859603014	0.022567382	0.507367909	0.01440296	0.655447715	-0.06670232	0.066193747
Q9HD34	0.008382224	0.737029247	-0.004834407	0.909156337	0.040206841	0.251907078	0.090772066	0.066203119
Q4G0F5	0.031478751	0.670146462	-0.130342401	0.021579209	0.063265799	0.000327422	-0.180293104	0.06624161
Q8TDD1	-0.096175778	0.250235209	0.018427562	0.792446763	-0.031758788	0.654775776	-0.237934336	0.066305909
P52630	-0.087305687	0.532435681	-0.119509799	0.233410172	-0.064444379	0.311105441	-0.230627286	0.066480687
Q9Y6Q5	0.003310939	0.912924496	-0.089785144	0.05982317	0.052846873	0.27798794	-0.095660812	0.066509122
Q5U3C3	0.023542872	0.729301531	-0.014366007	0.755842031	0.017937767	0.739381576	-0.121082438	0.066542555
P27816	0.014803316	0.471137936	0.052174053	0.106399809	0.076444125	0.03010585	0.06423782	0.066596122
Q5JSH3	-0.034270042	0.557113749	0.04074141	0.49732069	0.021163148	0.815925595	0.601325052	0.066838476
Q9NZR1	-0.013077568	0.95030825	1.214066662	0.046800113	-0.230217698	0.61981114	0.725192005	0.06690397
Q96PC3	0.102730081	0.407706784	0.015033606	0.757711416	0.171757266	0.071157468	-0.092301418	0.066931685
Q4KMP7	0.014902243	0.817997655	0.092194757	0.267628102	0.044001894	0.402448939	-0.099214743	0.066958404
Q8IX12	-0.016587335	0.736330462	-0.060978715	0.386506791	0.017932928	0.686901089	0.095883447	0.067075282
Q9BZV2	0.247553554	0.222503164	0.027034049	0.884999597	0.181939863	0.439654897	0.369764063	0.067217469
Q8NC74	-0.035080867	0.70625588	-0.052662876	0.530464367	0.134569564	0.324665243	-0.290537563	0.067241635
Q9P219	-0.007444128	0.975514407	0.124162056	0.140516209	-0.328201881	0.325470772	0.227580864	0.067288676
Q9Y5A9	0.136955148	0.031997674	0.1008545	0.106646372	0.028020001	0.703319462	-0.39934737	0.067296099
O95757	-0.010960449	0.576562527	0.054533301	0.268069375	0.047043676	0.453648464	0.066257403	0.067426713
Q9NX08	0.077697024	0.419035997	-0.165672787	0.116481538	0.089096403	0.644445365	-0.318167387	0.067532779
Q13404	-0.000176936	0.994467191	-0.030864731	0.390648782	0.027919405	0.465961329	0.060990653	0.067595074
Q13509	0.026504654	0.462306701	-0.034964935	0.188464201	0.091210118	0.124535481	0.155317931	0.067607077
Q96P11	-0.180745622	0.159753881	-0.108495554	0.159477445	-0.035428113	0.455153299	0.083736794	0.067607435
Q9NX02	-0.037281275	0.328360172	-0.067837108	0.129174065	0.072399404	0.256422484	-0.08186659	0.067631054
Q8TB96	0.125020622	0.108780593	0.085756038	0.234654718	0.120707827	0.326396038	0.138612491	0.067704691
Q9BXS1	0.030658109	0.54971127	0.009214006	0.848564816	0.107962592	0.031838636	-0.066547703	0.067737693
Q13200	-0.025601201	0.011463704	0.015739614	0.55779375	0.013367554	0.525501215	0.062224398	0.067916302
P46977	0.032453926	0.576054495	0.034394709	0.639854576	0.008826261	0.918801262	0.143233657	0.068005019
Q9UBI6	0.081699389	0.061192615	0.059890446	0.130774578	0.068481254	0.041794312	0.16661482	0.068237157
P52788	0.024702378	0.355647319	-0.011405184	0.719065105	0.016646481	0.484073118	-0.059713147	0.06828149
Q9UFW8	0.123780741	0.365088145	-0.015219983	0.896799845	-0.024107031	0.772435895	-0.381791137	0.06837147
Q15904	-0.002295523	0.933671082	-0.003947347	0.912341914	0.115455279	0.088844021	-0.044068252	0.068407514
Q96HY6	-0.085291476	0.258587016	0.114897991	0.044817004	-0.151799697	0.037714964	0.113868968	0.068512752
Q9ULD0	0.066115801	0.040592635	-0.039714608	0.644629586	0.176127026	0.180116827	-0.19121186	0.068697356
Q9Y4E1	-1.49954E-05	0.999416934	0.053271725	0.414910301	-0.015763891	0.618363469	0.036164446	0.068800485
P30484	-0.020513731	0.387629465	0.065565633	0.190459304	-0.015844542	0.424166984	-0.119833498	0.068814121
Q8WVB6	-0.075819519	0.809375529	-0.043558396	0.887283719	0.044778321	0.829786307	-0.47692142	0.06883108
P61106	0.022355295	0.617435215	0.067909475	0.065271517	0.060421038	0.229516973	0.103328933	0.068906552
Q9Y3D2	0.161842531	0.095704275	0.129880119	0.027432404	0.153267265	0.167552596	-0.151866616	0.068951431
Q8NC42	0.113831509	0.220762613	0.028751324	0.655195272	0.057025396	0.595563795	0.215469804	0.068973627
Q9Y2W6	-0.692885525	0.161492107	0.456732015	0.070889956	-0.89646483	0.08776206	0.200085338	0.069080334
Q96FQ6	-0.01788779	0.895767376	0.125991384	0.39034768	0.069528356	0.431224817	0.217585734	0.069111695
P21333	0.050610415	0.342049607	0.194941733	0.01385149	0.097771406	0.132170497	0.110130499	0.069186799
O43852	0.114979255	0.032260102	0.090943842	0.068248108	0.040046662	0.610409263	0.063741644	0.069234806
Q8TCT9	-0.06587325	0.262643556	-0.024127009	0.24159475	0.079002196	0.036860168	0.108454671	0.069450969
Q96EU6	-0.076335848	0.595752083	0.01877763	0.841941606	-0.251258019	0.01403114	-0.140224636	0.06948645
Q9BRZ2	-0.078033999	0.166903546	0.154820217	0.094300907	-0.082397702	0.298892367	0.093568295	0.069540201
Q9NQT4	0.048972618	0.519636229	-0.061745581	0.194609381	0.034522465	0.330670651	0.113590797	0.069553217
Q92599	-0.008310456	0.877873342	0.048888193	0.340565057	0.055377498	0.130823413	0.099743506	0.069581523
O75663	0.068620376	0.033801951	0.061816922	0.170251366	0.027497881	0.700194034	-0.194476675	0.069622616
P21127	0.014557765	0.571176377	-0.002055853	0.973870975	-0.043636207	0.315933914	-0.092843052	0.069633759
Q8WUM0	-0.048918084	0.103934897	0.094863276	0.092456834	0.024326423	0.559028139	0.05640324	0.069635089
P42858	-0.068456192	0.022091081	0.00165205	0.951485396	0.041657401	0.028878481	-0.050619596	0.0696948
P51570	0.083986469	0.045346905	0.037371103	0.278518719	-0.003440974	0.866005647	-0.148341308	0.069814488
Q9UJ83	0.029125771	0.574411585	-0.031287924	0.555947282	0.017522001	0.845109505	0.05454286	0.069854697
Q14004	-0.067310168	0.361295826	0.102015645	0.281350415	0.014617959	0.858375983	-0.219809217	0.069885023
Q8WUM4	0.01423234	0.501185524	0.0279781	0.043096836	0.036905621	0.062368789	-0.062096342	0.069955891
Q01968	0.012799358	0.790452308	-0.003955656	0.933758241	0.00607255	0.859679908	-0.140621202	0.070092471
O00488	-0.17798358	0.084578085	0.090326765	0.17768392	0.023251445	0.663437585	0.236295888	0.070134245
P08727	0.008554952	0.905928204	0.153091328	0.223344944	0.096335855	0.161963294	0.139097924	0.070135443
P36507	0.085156379	0.340872623	0.087713983	0.285434416	0.056907111	0.278669133	-0.199255371	0.070141535
P61960	0.003439931	0.914484331	-0.107985169	0.008086115	0.010651303	0.798290446	-0.147745531	0.070785258
Q9H1A4	-0.063486053	0.038043563	0.158321598	0.055618678	-0.01126107	0.888236491	-0.190914122	0.070914416
Q8TD19	-0.006901237	0.869735542	0.035062895	0.422826267	0.069558225	0.234357751	-0.111238702	0.070918995
Q96S59	0.142314563	0.13456769	0.048143029	0.382967931	-0.008115942	0.91816507	-0.243826614	0.070933366
O15400	-0.054088573	0.232938707	0.002441072	0.883697295	0.00106018	0.984602927	0.146353171	0.071006454
Q9Y2L5	0.035212138	0.555264895	-0.025605859	0.59232951	0.07003748	0.056765487	0.297580818	0.071081043
P81605	-0.587410323	0.119394096	-0.1414433	0.761912139	0.066678656	0.752191805	1.070563698	0.071096745
Q9Y6A9	-0.022947454	0.279047938	-0.017345009	0.746503055	0.07265891	0.314980371	0.175256179	0.07112781
Q9Y617	-0.09179339	0.069153639	0.24743903	0.004767022	-0.012715057	0.776344838	-0.124559977	0.071264902
O60493	-0.028048534	0.598289291	0.007591933	0.861122341	0.016320581	0.503099505	-0.164679931	0.071366968
P43487	-0.036259031	0.276190137	0.02490565	0.566235049	0.000773568	0.987094259	-0.060774321	0.071394389
P83731	-0.042980496	0.198026447	-0.036837085	0.311755831	0.050995792	0.3401842	-0.188952342	0.07146244
Q16877	-0.060686697	0.284128713	0.0940251	0.450569652	-0.059531682	0.227339721	-0.2587733	0.07149337
Q9UKF6	0.009322234	0.591998697	-0.044119518	0.46827076	0.001994245	0.972980338	-0.128656304	0.071506738
P13688	0.155051246	0.072152626	0.02675171	0.750991668	0.141385477	0.266584413	-0.468233442	0.071665181
P01892	-0.001632655	0.984448871	-0.033135595	0.669656831	-0.04992842	0.545088078	-0.160956398	0.07182393
Q9NVD7	0.028411862	0.403546677	0.07162403	0.103681852	0.03207637	0.08143404	-0.051443622	0.071850004
Q96BM9	0.076933147	0.132888524	0.105165549	0.070952099	0.128199468	0.229669013	-0.116862789	0.071930299
Q9NYM9	-0.123548189	0.262993793	-0.018209934	0.864433657	-0.115206786	0.412859245	0.212380747	0.072321432
Q9HAV0	0.022885328	0.846880463	0.058207948	0.629236877	0.23759565	0.35413506	0.260606491	0.072358552
O75323	0.016310582	0.755991952	-0.035434672	0.557174896	0.045177242	0.431793942	0.130164301	0.072379083
O15014	0.138426701	0.10455394	-0.037084677	0.670738975	0.102110422	0.417578723	0.238919267	0.072437351
Q69YU5	0.326326706	0.077146682	-0.100523271	0.618815271	0.281988371	0.122480324	-0.2102619	0.072605713
Q8IXI2	0.03104282	0.53894746	0.064798378	0.033509787	0.164526841	0.114053817	-0.398745028	0.072712364
Q92805	0.012516593	0.921235199	0.072612742	0.494755624	-0.1677586	0.155525921	-0.233609021	0.072838553
P38432	0.000348898	0.995322289	-0.05195514	0.43878706	0.044645402	0.493291233	-0.04503674	0.07285709
Q9UH65	0.05288853	0.293408143	0.030599695	0.349281121	0.054340875	0.11811591	-0.148956306	0.072931347
Q9BT78	0.001561327	0.908427938	0.047705981	0.050537	0.019145193	0.17599281	0.050418953	0.072959518
Q9UNI6	-0.119926582	0.210873909	0.199410049	0.072774712	0.095196927	0.27233236	0.155676249	0.072997647
P56556	-0.108115035	0.00225665	0.016692978	0.723889828	0.051007176	0.256144779	-0.145716701	0.073110089
O43639	-0.046992666	0.461231772	-0.111380349	0.161013138	0.022736582	0.724070457	0.223992348	0.07321745
Q5T4S7	0.033753624	0.235463845	0.01092864	0.53760762	0.057177861	0.146965739	0.057929589	0.073227663
Q96RQ3	-0.03158135	0.239827183	-0.021012495	0.730791982	-0.072161702	0.312348978	-0.150439313	0.073475421
Q13098	0.002227948	0.898534858	0.063781212	0.303856193	0.036733492	0.226610104	0.061448519	0.0735102
P48059	-0.063087171	0.119034359	-0.013961654	0.608287621	0.01045348	0.768760401	-0.052249542	0.073532443
Q05682	0.048226692	0.283274134	0.256574169	0.018149391	0.006247205	0.957095608	0.193888425	0.07362589
O75223	-0.056966701	0.074102221	-0.007107128	0.884716363	0.036378439	0.56010011	-0.105929915	0.073722649
Q15418	0.036198287	0.188138849	0.001797457	0.935827764	0.063855074	0.006243163	-0.038716775	0.073722997
O15530	-0.007084383	0.927117451	0.022301607	0.707246707	-0.095828797	0.223971335	-0.336842695	0.073767947
Q15021	-0.071534895	0.114434467	0.113314155	0.020178377	0.0425611	0.413688697	-0.104649002	0.073805251
O95905	-0.248442443	0.04959897	-0.122952992	0.481200692	0.131730013	0.307709676	-0.348207256	0.073837041
Q8IWE2	0.16433097	0.137379632	0.036023934	0.459785538	0.085509699	0.574362168	0.123424928	0.074025535
O00471	0.032215524	0.19150278	-0.011457467	0.698455135	0.082814432	0.002385404	0.077015112	0.074039737
P08559	-0.002895085	0.772343111	0.041673653	0.020828228	0.021818212	0.348415388	0.054536648	0.074135062
P06731	0.096089531	0.078821598	-0.134918991	0.099738886	0.103937335	0.343688518	0.200205717	0.074194856
Q9UBC5	-0.039842046	0.444177075	-0.068909778	0.291039399	0.081633016	0.147256285	0.092297097	0.074317445
P60709	-0.065089435	0.406896444	-0.036103946	0.630713752	-0.05727038	0.472270961	0.126066631	0.074372814
Q9TT36	0.021749789	0.908364718	1.111238103	0.039885982	-0.027005992	0.856757411	0.628268306	0.07457715
Q9NXN4	-0.002337101	0.967108966	-0.082242006	0.250303044	0.094238455	0.163677028	-0.244012762	0.074590034
Q9UQ35	-0.062274369	0.037708659	0.026301519	0.535793486	0.013674169	0.741039288	0.041132608	0.074624456
Q9NVC3	-0.148558052	0.275039145	-0.132463177	0.423144751	-0.291338749	0.016136348	-0.109154729	0.074810484
Q5MNZ6	0.128646969	0.121155868	-0.19645101	0.122760228	0.037222967	0.77906432	0.249205744	0.074851085
P35869	-0.148116105	0.278289644	-0.110728304	0.636254555	0.022309749	0.912990626	0.351911077	0.074871047
Q9H6S3	0.047320289	0.241282997	-0.002039317	0.898628077	0.002454592	0.959399287	-0.089298827	0.074920003
P49585	-0.045142686	0.317803312	0.024878729	0.597271529	0.035008575	0.429970696	0.068218391	0.075051835
P80217	-0.046447073	0.011327448	-0.081111535	0.019640558	0.024664923	0.343317279	-0.1208839	0.07510006
Q13416	0.020749342	0.782936108	-0.012059846	0.717610652	0.102821663	0.097661368	-0.15821733	0.075102127
Q5T8D3	0.058462378	0.386111294	0.029757176	0.58871078	0.047506552	0.175973457	0.117875249	0.075183395
Q96AY3	-0.028287804	0.147794841	0.170721678	0.008614777	-0.047281726	0.197249343	-0.084660315	0.075249195
P54652	0.033466839	0.650094358	0.180465942	0.147785484	0.12048852	0.181571254	-0.252130144	0.07528053
P78345	-0.115860283	0.156149855	0.102376678	0.096321062	-0.147914316	0.10499293	0.406498857	0.075303159
Q13206	-0.199967584	0.043882734	0.047129564	0.262230012	0.116477912	0.201943555	0.308483462	0.075327834
Q9NYF8	-0.032376422	0.226804073	0.024458145	0.132131852	0.066964058	0.346210166	0.050453586	0.075343804
Q13442	-0.025846346	0.532210271	-0.005145539	0.87422486	0.074270937	0.066929141	-0.074408987	0.075410767
Q8IUE6	0.132734847	0.122984367	-0.082177277	0.158765792	0.119299767	0.172091146	-0.126712617	0.075415677
P52732	0.025283442	0.357468472	0.264985779	0.009577495	-0.213084836	0.043026754	-0.274194732	0.075434608
Q9H3H3	0.129133605	0.106660157	-0.128698127	0.09949309	0.134790316	0.019325573	0.087192042	0.075525739
Q16666	-0.031959739	0.815227819	0.227301683	0.230558922	0.21117504	0.241400572	-0.295017802	0.075534388
Q969T4	0.071491617	0.749530017	-0.102449128	0.133167413	0.217026856	0.128054336	-0.306472175	0.075617794
P82912	-0.00732744	0.862765852	-0.092343149	0.328122546	0.086254637	0.273785264	0.104362954	0.075763512
Q99808	-0.159756315	0.039496319	0.038643271	0.629198334	-0.038533756	0.702364809	0.226830167	0.075770995
Q16555	-0.007731838	0.889379118	0.00647894	0.901208705	0.021288349	0.296639242	0.120683198	0.07577114
P09001	-0.012338368	0.913281761	-0.012142081	0.770978981	0.110052728	0.294603518	-0.155018678	0.075772554
Q9BVT8	0.03450784	0.463279485	0.127398101	0.054144485	-0.073690055	0.123347003	0.107894937	0.075812945
Q96F07	-0.183542012	0.36212223	0.197193821	0.402152793	-0.581356558	0.230295741	0.240761721	0.075826415
Q96D71	0.139984153	0.156686399	-0.065933509	0.453723369	0.119307411	0.398755037	0.111132072	0.075844393
P36405	0.005421368	0.864231405	0.072149848	0.10603706	0.032553123	0.461198672	-0.086844881	0.07590238
Q8IWU2	-0.09941032	0.071338611	0.020714359	0.782831936	-0.065784099	0.281753587	0.22241562	0.076106026
O00506	-0.029791936	0.583090407	0.044541993	0.403362966	0.052222278	0.501092195	0.143435353	0.076415525
P49915	-0.062768335	0.020352103	0.001837142	0.899876191	0.077134546	0.125584459	0.050927111	0.076613522
Q9Y5X3	-0.038119809	0.041343206	-0.010524731	0.728328171	0.046952232	0.168119212	-0.059409487	0.076718998
Q16762	0.021842626	0.365623754	0.017008096	0.684908744	0.049868648	0.27911066	0.077123718	0.076754718
Q8N8V4	-0.086390356	0.112059277	-0.070620994	0.273936996	0.027979843	0.495838836	-0.110165023	0.076834055
Q9UBP6	0.053497632	0.66894048	0.092428866	0.387895324	0.083610419	0.084559096	0.181294586	0.076854944
Q7Z3B4	0.05743403	0.216754824	-0.010262996	0.783515062	0.08929033	0.019630928	0.058190809	0.076909228
O15031	0.018738455	0.404049378	0.0371184	0.140549909	0.054567347	0.091017134	0.125650084	0.077109632
Q7L0Y3	-0.051893779	0.009667309	0.005635121	0.883843888	0.012011416	0.806790607	0.07548084	0.077584953
Q8N1G4	0.013548355	0.340359297	0.004521174	0.896253172	0.031056089	0.324962044	-0.058130109	0.077894257
Q9H2J4	-0.090938196	0.409849802	-0.035036712	0.635006101	-0.005874962	0.915270751	-0.118579619	0.077965304
P10155	-0.001939756	0.954759804	0.022074349	0.345338573	0.020515513	0.419766741	-0.027862238	0.07801939
O14929	-0.169218007	0.107754869	0.144446112	0.032366032	-0.07188754	0.247226654	-0.142756196	0.078730423
Q8NDF8	-0.07511447	0.607355905	-0.019358129	0.912923657	0.004849637	0.971304691	-0.278494986	0.078736218
Q13509	0.001692566	0.966158986	0.0030004	0.896594199	0.002853848	0.950489677	0.072859395	0.078790054
Q8TCC3	-0.015887137	0.810226307	0.062987336	0.311099392	0.004674446	0.944025552	0.184931195	0.078836596
Q04695	0.070033323	0.119570491	0.349668804	0.147258255	-0.146394772	0.032625029	0.37284366	0.079039412
Q9Y6M1	-0.069499983	0.041881655	-0.091893045	0.043351432	0.036866486	0.49029773	-0.141710038	0.079114667
O94888	-0.019843988	0.714633364	0.018767253	0.468033207	-0.07034278	0.018382934	-0.066250619	0.079168888
P00966	0.060592227	0.128971831	0.002900975	0.866568174	0.036946116	0.399803513	-0.081915231	0.079173384
Q5T0Z8	0.010497483	0.826043089	-0.060903523	0.205239689	0.102163242	0.165265075	0.165759118	0.079194579
Q5T0F9	-0.042326755	0.290962229	-0.029596675	0.50868913	0.038688115	0.612417685	0.121577924	0.079195534
Q52LJ0	-0.07406731	0.013334447	0.02870201	0.271643508	0.055964527	0.245906182	0.082130604	0.079260058
Q14517	-0.105330907	0.290981844	0.015252365	0.90783634	-0.091218685	0.331503532	0.356658591	0.079426176
P61026	0.025721546	0.657160474	0.026808186	0.555592777	0.107517869	0.020329681	0.130420297	0.079426506
Q14558	-0.044688458	0.407155019	0.056871969	0.292514318	0.064114666	0.107906637	-0.093386334	0.079603481
P51659	-0.024924752	0.063379528	-0.012699956	0.577804226	0.041126998	0.120851306	0.026602382	0.079616332
Q14353	-0.086912579	0.160950705	-0.019222486	0.736470137	0.031880427	0.685768434	-0.239680631	0.07961867
P31939	-0.018623162	0.068449628	-0.036785078	0.012921139	0.035849641	0.026708716	0.02550385	0.079622153
Q96DX5	-0.082225339	0.65390003	-0.15238377	0.203024121	-0.138466266	0.257000057	0.358917156	0.079633301
P12763	-0.180321978	0.503811349	0.873015999	0.059646004	-0.043066473	0.836920728	0.920490058	0.079662962
O94901	0.019400133	0.755880432	-0.016860683	0.508141056	0.240919657	0.293111574	0.050181153	0.079707838
Q8NBN7	0.059380304	0.538113344	0.020989275	0.723231136	0.025114176	0.694021393	0.205822898	0.079749293
P35610	-0.090159391	0.153796164	0.04160938	0.501866436	-3.11591E-05	0.999679846	-0.11998575	0.079893778
Q96TC7	0.014712593	0.628303126	0.014294087	0.711008524	0.028404681	0.301055492	0.036877402	0.079956662
Q9Y3E0	0.024225626	0.709753156	0.200503883	0.033529932	-0.082386507	0.276301499	0.135150705	0.080031939
P35527	-0.399297594	0.188901384	-0.396624277	0.433991572	0.340426413	0.361074804	1.720506171	0.080242172
Q15459	-0.03391686	0.321868005	0.022416295	0.365504504	0.012842873	0.755898836	0.092974922	0.080432834
Q8N5I4	0.010066361	0.917338228	-0.010721443	0.940501756	0.089160807	0.466138152	0.146302832	0.080459905
Q29RF7	-0.040049175	0.089929031	0.004476828	0.923344202	0.025022738	0.487526838	0.051558273	0.080575067
P57105	0.024458413	0.390213654	0.020376526	0.697878241	-0.024129788	0.146172415	-0.073086139	0.080638595
Q9UKA9	-0.020330176	0.627256115	0.084270789	0.330456618	0.09622442	0.250872204	0.224859058	0.08074255
P03928	0.011903829	0.805632573	-0.067233011	0.216268081	0.230553671	0.01281945	0.208316008	0.080778363
Q9UG63	-0.056973862	0.258316777	0.098340722	0.116971458	-0.009465786	0.826451197	-0.119894039	0.080783317
Q99653	-0.003345121	0.955161143	0.05910273	0.433901435	-0.058684026	0.363529463	0.09036732	0.080996681
Q16773	0.060750045	0.152171251	0.127284554	0.027047049	0.087249346	0.24450414	-0.107171269	0.081045422
Q9HA64	0.009102661	0.727215028	-0.042292333	0.053097476	0.0335252	0.583267985	0.176872955	0.08110266
P51668	-0.032846611	0.692485863	-0.08986842	0.118885587	-0.008337477	0.924566618	0.230013635	0.081113536
Q9UIJ7	0.026355893	0.714613065	0.121823604	0.002750922	0.075697456	0.044531081	0.137405082	0.081274859
P60953	0.022107519	0.837444813	0.118833497	0.699286822	-0.072790306	0.574496751	0.618532439	0.081276357
P04075	0.135230426	0.334734448	0.1346406	0.108755355	0.163529956	0.135156873	0.155515719	0.081340084
Q9NW68	0.082163229	0.05571643	-0.010834415	0.841114174	0.096200329	0.19299456	0.087195359	0.08142398
Q08722	-0.002142193	0.954045555	0.327231869	0.009289543	0.241041382	0.04794065	0.351679527	0.08144911
Q9NZD2	0.023877887	0.656148232	-0.070959831	0.187230836	0.068151217	0.115375418	-0.064990693	0.081485846
O96006	0.022167406	0.757120151	0.03094717	0.708169486	-0.074543693	0.261779705	-0.226747256	0.08162063
Q92485	0.044172647	0.438372155	0.015036786	0.753877866	0.026470616	0.564491089	0.109953054	0.081628468
Q96TA2	-0.042671319	0.476810894	0.048216921	0.414691008	-0.128752964	0.067141195	-0.124609058	0.081775581
Q7Z5J4	0.071638821	0.140328056	0.020898445	0.409544393	0.096315233	0.473723308	0.574269204	0.08181774
O43681	-0.007827801	0.846708463	0.052496264	0.087673821	0.07366395	0.004276242	-0.098594357	0.081921493
Q99470	0.047250877	0.523915767	-0.004223487	0.961564155	0.089779921	0.162978339	0.087488803	0.081928666
[truncated: 4,382 more rows]
