# Supplementary material for: Re-analysis of SARS-CoV-2-infected host cell proteomics time-course data by impact pathway analysis and network analysis: a potential link with inflammatory response
Source: Aging (Albany NY). 2020 Jun 23;12(12):11277–86. doi: 10.18632/aging.103524 (PMC7343490; doi:10.18632/aging.103524)
Supplement: Supplementary Table 2 [file aging-12-103524-s002..csv]

entity	name	countDE (2h vs. mock)	countAll (2h vs. mock)	pv_fdr (2h vs. mock)	countDE (6h vs. mock)	countAll (6h vs. mock)	pv_fdr (6h vs. mock)	countDE (10h vs. mock)	countAll (10h vs. mock)	pv_fdr (10h vs. mock)	countDE (24h vs. mock)	countAll (24h vs. mock)	pv_fdr (24h vs. mock)
8370	Transcriptional misregulation in cancer										5	38	0.042917944
8707	Proteoglycans in cancer				1	96	0.339916468				6	96	0.042917944
8192	Axon guidance							1	64	0.517562955	3	64	0.045320429
8616	Linoleic acid metabolism										2	3	0.045320429
8166	Neomycin, kanamycin and gentamicin biosynthesis										2	3	0.045320429
8196	Neuroactive ligand-receptor interaction				1	5	0.26525351	1	5	0.121362345	2	5	0.045320429
8554	Cholesterol metabolism				1	25	0.220510374				4	25	0.056955903
8420	PPAR signaling pathway				1	33	0.332743645				4	33	0.116735195
8490	ECM-receptor interaction				1	29	0.261949557				4	29	0.117196865
8399	Starch and sucrose metabolism										3	19	0.123056919
8168	alpha-Linolenic acid metabolism										2	7	0.123056919
8654	Complement and coagulation cascades				3	12	0.01006976				3	12	0.123056919
8480	Vascular smooth muscle contraction										5	44	0.123056919
8730	Systemic lupus erythematosus	1	21	0.074363626				1	21	0.147031046	3	21	0.123056919
8485	Hedgehog signaling pathway										2	15	0.160561809
8526	Insulin secretion				1	21	0.199307398	1	21	0.121362345	1	21	0.166853536
8704	Pathways in cancer				5	172	0.210531709	2	172	0.162764409	7	172	0.166853536
8531	Thyroid hormone synthesis										3	26	0.166853536
8356	Other glycan degradation										2	10	0.167569184
8624	Lysosome										5	78	0.232500814
8538	Cortisol synthesis and secretion										2	19	0.232500814
8671	Pancreatic secretion				1	29	0.210531709	1	29	0.121362345	3	29	0.232500814
8607	Pyrimidine metabolism										3	32	0.234295593
8412	Arachidonic acid metabolism										2	14	0.243108628
8552	Fat digestion and absorption										2	14	0.243108628
8201	Type II diabetes mellitus										2	18	0.249052061
8410	Ether lipid metabolism										2	16	0.288447494
8736	Fluid shear stress and atherosclerosis				3	61	0.168778021				5	61	0.289187209
8181	Ras signaling pathway				1	74	0.196667316	1	74	0.121731959	4	74	0.289187209
8705	Viral carcinogenesis	1	95	0.074363626	1	95	0.188775307	1	95	0.121362345	1	95	0.436973843
8719	Small cell lung cancer				2	38	0.181448927				2	38	0.522179058
8734	Dilated cardiomyopathy (DCM)				2	27	0.181448927				1	27	0.522179058
8611	Drug metabolism - other enzymes				2	39	0.181448927				2	39	0.522179058
8489	Focal adhesion				2	89	0.168778021				4	89	0.556223391
8650	Retrograde endocannabinoid signaling				1	62	0.181448927	1	62	0.121731959	1	62	0.570377019
8700	Kaposi sarcoma-associated herpesvirus infection				2	75	0.181448927	1	75	0.121362345	1	75	0.585361895
8732	Hypertrophic cardiomyopathy (HCM)				2	27	0.180354377				1	27	0.597960692
8398	Glutathione metabolism				2	36	0.181448927				1	36	0.695884458
8451	Chemokine signaling pathway				1	63	0.186727564	2	63	0.121362345	1	63	0.932046647
8524	Regulation of actin cytoskeleton				1	102	0.210531709	1	102	0.121362345	1	102	0.993630289
8706	Chemical carcinogenesis				2	28	0.180354377
8728	Autoimmune thyroid disease				1	2	0.168778021
8473	Allograft rejection				1	2	0.168778021
8735	Viral myocarditis				3	19	0.094372915
8355	Metabolism of xenobiotics by cytochrome P450				2	27	0.180354377
8375	Synthesis and degradation of ketone bodies	1	9	0.074363626				1	9	0.121362345
8632	Calcium signaling pathway				2	43	0.186727564	1	43	0.121362345
8519	GABAergic synapse				1	23	0.181448927	1	23	0.121362345
8656	Hematopoietic cell lineage				3	12	0.01006976
8659	Intestinal immune network for IgA production							1	3	0.121362345
8411	Graft-versus-host disease				1	2	0.168778021
8669	Type I diabetes mellitus				1	4	0.181448927
8419	Butanoate metabolism	1	18	0.074363626				1	18	0.141599079
8430	Drug metabolism - cytochrome P450				2	22	0.168778021
8436	Platinum drug resistance				2	40	0.181448927
8182	Cytokine-cytokine receptor interaction							1	7	0.121362345
8443	DNA replication	1	29	0.081690191
8191	Cardiac muscle contraction				2	32	0.181448927
