# Supplementary material for: Re-analysis of SARS-CoV-2-infected host cell proteomics time-course data by impact pathway analysis and network analysis: a potential link with inflammatory response
Source: Aging (Albany NY). 2020 Jun 23;12(12):11277–86. doi: 10.18632/aging.103524 (PMC7343490; doi:10.18632/aging.103524)
Supplement: Supplementary Table 3 [file aging-12-103524-s001..csv]

pName	countDE	countAll	pv_fdr	pAcc_fdr	pComb_fdr	pORA_fdr
Transcriptional misregulation in cancer	5	38	0.0429179441747638	0.374312843578211	0.0294896303532119	0.0661861206446957
Proteoglycans in cancer	6	96	0.0429179441747638	0.139930034982509	0.0294896303532119	0.187283205376769
Axon guidance	3	64	0.045320428604425	0.0559720139930035	0.0326640370494134	0.57449108408509
Neomycin, kanamycin and gentamicin biosynthesis	2	3	0.045320428604425			0.0661861206446957
Linoleic acid metabolism	2	3	0.045320428604425			0.0661861206446957
Neuroactive ligand-receptor interaction	2	5	0.045320428604425	0.374312843578211	0.0467106258008798	0.0951029266784928
Cholesterol metabolism	4	25	0.0569559031991378	0.374312843578211	0.0547894823412565	0.0661861206446957
PPAR signaling pathway	4	33	0.116735195072599			0.10376461784231
ECM-receptor interaction	4	29	0.117196864880417	0.377602243654292	0.120791860735644	0.0828981813230503
Starch and sucrose metabolism	3	19	0.123056919216075			0.129625465734162
alpha-Linolenic acid metabolism	2	7	0.123056919216075			0.136935087742862
Complement and coagulation cascades	3	12	0.123056919216075	0.8474821412823	0.146221608310438	0.0661861206446957
Vascular smooth muscle contraction	5	44	0.123056919216075	0.717141429285357	0.146221608310438	0.0729959580356237
Systemic lupus erythematosus	3	21	0.123056919216075			0.136935087742862
Hedgehog signaling pathway	2	15	0.160561809437369	0.374312843578211	0.171971742564098	0.288035794175119
Insulin secretion	1	21	0.166853535940167	0.242545393969682	0.171971742564098	0.712735382674506
Pathways in cancer	7	172	0.166853535940167	0.374312843578211	0.171971742564098	0.437700912849382
Thyroid hormone synthesis	3	26	0.166853535940167	0.374312843578211	0.171971742564098	0.187283205376769
Other glycan degradation	2	10	0.167569183758162			0.187283205376769
Lysosome	5	78	0.232500813620025			0.247331985850352
Cortisol synthesis and secretion	2	19	0.232500813620025	0.374312843578211	0.251043823295242	0.36665639842498
Pancreatic secretion	3	29	0.232500813620025	0.374312843578211	0.251043823295242	0.231335879399471
Pyrimidine metabolism	3	32	0.234295592575833			0.269439931462208
Arachidonic acid metabolism	2	14	0.243108627680264			0.276259804182118
Fat digestion and absorption	2	14	0.243108627680264			0.276259804182118
Type II diabetes mellitus	2	18	0.249052061372561	0.374312843578211	0.296621514403639	0.344650589733455
Ether lipid metabolism	2	16	0.288447494471159			0.311523294028852
Fluid shear stress and atherosclerosis	5	61	0.289187208792993	0.928381962864721	0.33538772484139	0.136935087742862
TGF-beta signaling pathway	3	24	0.289187208792993	0.851803983065938	0.33538772484139	0.178461580114112
Ras signaling pathway	4	74	0.289187208792993	0.374312843578211	0.33538772484139	0.426098370890344
Glycerophospholipid metabolism	3	40	0.289187208792993			0.344650589733455
HIF-1 signaling pathway	3	51	0.289187208792993	0.374312843578211	0.33538772484139	0.466268632966766
Rheumatoid arthritis	2	18	0.289187208792993			0.344650589733455
Carbohydrate digestion and absorption	2	15	0.289187208792993	0.424728812064556	0.33538772484139	0.288035794175119
Alcoholism	3	49	0.292865352584714	0.374312843578211	0.33538772484139	0.437700912849382
Galactose metabolism	2	21	0.352568834797021			0.423082601756425
Human papillomavirus infection	4	128	0.422398085679932	0.374312843578211	0.487909444262179	0.676868338646055
Aldosterone synthesis and secretion	1	29	0.436973842938105	0.374312843578211	0.487909444262179	0.720316516531594
Viral carcinogenesis	1	95	0.436973842938105	0.374312843578211	0.487909444262179	0.899856668234064
Basal cell carcinoma	1	9	0.471361268643121	0.374312843578211	0.518208216815014	0.57449108408509
Central carbon metabolism in cancer	2	37	0.492913887405155	0.374312843578211	0.537166936405502	0.57449108408509
Fructose and mannose metabolism	2	28	0.492913887405155			0.544799559763592
Inflammatory mediator regulation of TRP channels	2	29	0.509940588459171			0.548186132593609
Ubiquinone and other terpenoid-quinone biosynthesis	1	7	0.522179058183967			0.57449108408509
Amoebiasis	2	33	0.522179058183967	0.374312843578211	0.537717256050562	0.57449108408509
TNF signaling pathway	2	40	0.522179058183967	0.374312843578211	0.537717256050562	0.57449108408509
Fc epsilon RI signaling pathway	2	26	0.522179058183967	0.562118940529735	0.537717256050562	0.494742367683273
Toxoplasmosis	3	49	0.522179058183967	0.649569951866172	0.537717256050562	0.437700912849382
African trypanosomiasis	1	10	0.522179058183967	0.374312843578211	0.537717256050562	0.57449108408509
Ribosome biogenesis in eukaryotes	3	65	0.522179058183967			0.57449108408509
Huntington disease	4	126	0.522179058183967	0.374312843578211	0.537717256050562	0.672937469975261
Phagosome	3	66	0.522179058183967			0.57449108408509
Adrenergic signaling in cardiomyocytes	1	46	0.522179058183967	0.374312843578211	0.537717256050562	0.779875512316376
Human immunodeficiency virus 1 infection	1	109	0.522179058183967	0.374312843578211	0.537717256050562	0.920879442847217
MAPK signaling pathway	3	96	0.522179058183967	0.374312843578211	0.537717256050562	0.71061235585361
Small cell lung cancer	2	38	0.522179058183967	0.377602243654292	0.537717256050562	0.57449108408509
Leishmaniasis	1	20	0.522179058183967	0.374312843578211	0.537717256050562	0.71061235585361
Amino sugar and nucleotide sugar metabolism	2	37	0.522179058183967			0.57449108408509
Mucin type O-glycan biosynthesis	1	10	0.522179058183967			0.57449108408509
Estrogen signaling pathway	2	51	0.522179058183967	0.374312843578211	0.537717256050562	0.676868338646055
Dilated cardiomyopathy (DCM)	1	27	0.522179058183967	0.374312843578211	0.537717256050562	0.720316516531594
VEGF signaling pathway	1	30	0.522179058183967	0.374312843578211	0.537717256050562	0.720316516531594
Drug metabolism - other enzymes	2	39	0.522179058183967			0.57449108408509
Hippo signaling pathway	1	47	0.522179058183967	0.374312843578211	0.537717256050562	0.779875512316376
Renin-angiotensin system	1	11	0.522179058183967			0.57449108408509
Vitamin digestion and absorption	1	11	0.522179058183967			0.57449108408509
One carbon pool by folate	1	11	0.522179058183967			0.57449108408509
Antigen processing and presentation	1	28	0.522179058183967	0.374312843578211	0.537717256050562	0.720316516531594
Insulin signaling pathway	2	73	0.522179058183967	0.374312843578211	0.537717256050562	0.720316516531594
Long-term depression	1	27	0.522179058183967	0.374312843578211	0.537717256050562	0.720316516531594
Phospholipase D signaling pathway	3	48	0.522179058183967	0.855127991559776	0.537717256050562	0.437700912849382
Renin secretion	1	21	0.522179058183967	0.374312843578211	0.537717256050562	0.712735382674506
mTOR signaling pathway	1	68	0.522179058183967	0.374312843578211	0.537717256050562	0.819483905381211
Necroptosis	2	66	0.522179058183967	0.374312843578211	0.537717256050562	0.720316516531594
Acute myeloid leukemia	1	26	0.522179058183967	0.374312843578211	0.537717256050562	0.720316516531594
Toll-like receptor signaling pathway	1	32	0.522179058183967	0.374312843578211	0.537717256050562	0.746573827955118
Protein processing in endoplasmic reticulum	1	113	0.522179058183967	0.374312843578211	0.537717256050562	0.922641700322641
Glycolysis / Gluconeogenesis	2	45	0.522179058183967			0.656052365014999
Serotonergic synapse	1	29	0.522179058183967	0.374312843578211	0.537717256050562	0.720316516531594
Antifolate resistance	1	20	0.522179058183967	0.374312843578211	0.537717256050562	0.71061235585361
Retinol metabolism	1	14	0.522179058183967			0.656052365014999
Collecting duct acid secretion	1	14	0.522179058183967			0.656052365014999
Endocrine resistance	1	38	0.522179058183967	0.374312843578211	0.537717256050562	0.778547100244819
GnRH signaling pathway	2	35	0.522179058183967	0.647460053756905	0.537717256050562	0.57449108408509
Ovarian steroidogenesis	1	15	0.522179058183967	0.441286603075274	0.537717256050562	0.661555108747208
Cytosolic DNA-sensing pathway	1	25	0.522179058183967	0.374312843578211	0.537717256050562	0.720316516531594
Amyotrophic lateral sclerosis (ALS)	1	25	0.522179058183967	0.374312843578211	0.537717256050562	0.720316516531594
Insulin resistance	1	50	0.522179058183967	0.374312843578211	0.537717256050562	0.781087946525421
Metabolic pathways	19	743	0.522179058183967			0.661555108747208
T cell receptor signaling pathway	1	42	0.522179058183967	0.374312843578211	0.537717256050562	0.778547100244819
Breast cancer	1	36	0.527205490142807	0.374312843578211	0.537717256050562	0.778547100244819
p53 signaling pathway	1	25	0.527205490142807	0.374312843578211	0.537717256050562	0.720316516531594
Biosynthesis of unsaturated fatty acids	1	16	0.527205490142807			0.672937469975261
Neurotrophin signaling pathway	1	50	0.527205490142807	0.374312843578211	0.537717256050562	0.781087946525421
Vibrio cholerae infection	1	29	0.527205490142807	0.374312843578211	0.537717256050562	0.720316516531594
Choline metabolism in cancer	2	40	0.537824450977092	0.647460053756905	0.54093499264913	0.57449108408509
Autophagy - animal	1	75	0.538224403673574	0.374312843578211	0.54093499264913	0.836523545141833
Glutamatergic synapse	1	33	0.538224403673574	0.374312843578211	0.54093499264913	0.75563124357036
Sphingolipid metabolism	1	18	0.541941117935583			0.686001415108332
Terpenoid backbone biosynthesis	1	18	0.541941117935583			0.686001415108332
Focal adhesion	4	89	0.556223390923531	0.906746626686657	0.564976973229343	0.548186132593609
RNA transport	2	125	0.556223390923531	0.374312843578211	0.564976973229343	0.815896845261309
Gastric cancer	1	45	0.561722147960473	0.374312843578211	0.566549404989325	0.779875512316376
Fc gamma R-mediated phagocytosis	1	47	0.561722147960473	0.374312843578211	0.566549404989325	0.779875512316376
Mineral absorption	1	20	0.561722147960473			0.71061235585361
RNA polymerase	1	21	0.570026824385161			0.712735382674506
Epithelial cell signaling in Helicobacter pylori infection	1	38	0.570026824385161	0.374312843578211	0.568277471444699	0.778547100244819
Oxidative phosphorylation	3	100	0.570026824385161			0.71753846313159
Platelet activation	2	50	0.570026824385161	0.634349491920706	0.568277471444699	0.672937469975261
Rap1 signaling pathway	3	67	0.570026824385161	0.855127991559776	0.568277471444699	0.57449108408509
Cell cycle	1	59	0.570377018752992	0.374312843578211	0.568277471444699	0.80999210552876
Thermogenesis	3	143	0.570377018752992	0.374312843578211	0.568277471444699	0.779875512316376
Retrograde endocannabinoid signaling	1	62	0.570377018752992	0.374312843578211	0.568277471444699	0.812670991300711
AMPK signaling pathway	1	61	0.570377018752992	0.374312843578211	0.568277471444699	0.811931014784903
Wnt signaling pathway	2	41	0.570377018752992	0.80203800538755	0.568277471444699	0.586465898941127
Parkinson disease	2	100	0.570377018752992	0.374312843578211	0.568277471444699	0.779875512316376
Non-alcoholic fatty liver disease (NAFLD)	2	96	0.57472213466016	0.377165263522085	0.570412698067617	0.779875512316376
Kaposi sarcoma-associated herpesvirus infection	1	75	0.585361894594208	0.374312843578211	0.57879266788546	0.836523545141833
Parathyroid hormone synthesis, secretion and action	2	38	0.591171786142583	0.861016300360458	0.582880103108252	0.57449108408509
Human cytomegalovirus infection	3	102	0.591171786142583	0.612538801022024	0.587994529873137	0.720316516531594
Arginine and proline metabolism	1	26	0.591171786142583			0.720316516531594
Ferroptosis	1	26	0.591171786142583			0.720316516531594
PI3K-Akt signaling pathway	4	103	0.594000335983814	0.906746626686657	0.590613397943921	0.57449108408509
Hypertrophic cardiomyopathy (HCM)	1	27	0.597960692020629			0.720316516531594
Ubiquitin mediated proteolysis	2	71	0.61088026785212			0.720316516531594
Osteoclast differentiation	2	40	0.61088026785212	0.896135265700483	0.614976625761815	0.57449108408509
Cell adhesion molecules (CAMs)	1	30	0.624649479179742			0.720316516531594
Synaptic vesicle cycle	1	30	0.624649479179742			0.720316516531594
AGE-RAGE signaling pathway in diabetic complications	2	38	0.644253118913578	0.975948389441643	0.656383122633339	0.57449108408509
Glutathione metabolism	1	36	0.695884458313647			0.778547100244819
Oxytocin signaling pathway	2	53	0.72936156967479	0.868449985533549	0.746039664686874	0.686001415108332
Inositol phosphate metabolism	1	40	0.732781421412727			0.778547100244819
Cushing syndrome	2	48	0.73455392031323	0.932866899883392	0.754250720134134	0.661555108747208
Fatty acid metabolism	1	42	0.74335573685566			0.778547100244819
Leukocyte transendothelial migration	2	48	0.74335573685566	0.975948389441643	0.774577379413542	0.661555108747208
Carbon metabolism	2	95	0.74335573685566			0.779875512316376
Adherens junction	1	44	0.74335573685566			0.779875512316376
NOD-like receptor signaling pathway	2	68	0.74335573685566	0.827441700836329	0.774577379413542	0.720316516531594
Epstein-Barr virus infection	2	91	0.767668309389859	0.700367764835531	0.796949869337244	0.778547100244819
Phosphatidylinositol signaling system	1	48	0.768841100599149			0.780341296342602
PD-L1 expression and PD-1 checkpoint pathway in cancer	1	41	0.768841100599149	0.717141429285357	0.804781311683738	0.778547100244819
Endocytosis	3	154	0.768841100599149			0.781087946525421
Pertussis	1	23	0.78870802943738	0.906746626686657	0.824432045390228	0.720316516531594
Cellular senescence	1	65	0.798833195413048	0.649569951866172	0.832003989384672	0.815896845261309
Oocyte meiosis	1	58	0.807398303759134	0.700367764835531	0.839599488340502	0.80999210552876
Purine metabolism	1	57	0.807398303759134			0.80999210552876
MicroRNAs in cancer	1	60	0.822074699030464			0.811040139311934
Mitophagy - animal	1	36	0.824119641137185	0.855127991559776	0.85598923941264	0.778547100244819
cAMP signaling pathway	1	55	0.824119641137185	0.751130607535738	0.85598923941264	0.809717543822605
C-type lectin receptor signaling pathway	1	42	0.824584203159106	0.8474821412823	0.85598923941264	0.778547100244819
Alzheimer disease	3	116	0.826004352626309	0.92547785513184	0.85598923941264	0.720316516531594
Pathogenic Escherichia coli infection	1	38	0.830513369192025	0.861016300360458	0.85598923941264	0.778547100244819
Tuberculosis	2	66	0.830513369192025	0.975948389441643	0.85598923941264	0.720316516531594
Colorectal cancer	1	40	0.835259534759478	0.861016300360458	0.858094970250251	0.778547100244819
Bacterial invasion of epithelial cells	1	51	0.852664146298538	0.851803983065938	0.873186029951783	0.783915440926534
cGMP-PKG signaling pathway	1	59	0.898180508766343	0.861016300360458	0.916915562323433	0.80999210552876
Tight junction	2	86	0.919443683830383	0.987506246876562	0.932886613672522	0.778547100244819
Progesterone-mediated oocyte maturation	1	41	0.919443683830383	0.975948389441643	0.932886613672522	0.778547100244819
Chemokine signaling pathway	1	63	0.932046646618392	0.906746626686657	0.940072939010615	0.813266095308142
Sphingolipid signaling pathway	1	56	0.932046646618392	0.928381962864721	0.940072939010615	0.80999210552876
Apoptosis	1	68	0.952426591541688	0.928381962864721	0.957844746161724	0.819483905381211
Hepatitis B	1	70	0.974260912631135	0.975948389441643	0.977007129761748	0.824204075235367
Regulation of actin cytoskeleton	1	102	0.993630289256634	0.987506246876562	0.993630289256634	0.911712389800955
